# Supplementary material for: Brain-Specific Rescue of Clock Reveals System-Driven Transcriptional Rhythms in Peripheral Tissue
Source: PLoS Genet. 2012 Jul 26;8(7):e1002835. doi: 10.1371/journal.pgen.1002835 (PMC3405989; doi:10.1371/journal.pgen.1002835)
Supplement: Table S1 — JTK_Cycle statistics of the top cycling genes in wildtype, tetO::Clock H2O, and tetO::Clock DOX datasets (JTK_Cycle p-value<0.1; key circadian genes shown in bold). (XLSX) [file pgen.1002835.s003.xlsx]

## Sheet: Sheet1
			Wildtype					tetO::Clock H2O					tetO::Clock DOX
Probe.Set.ID	Gene.Symbol	mRNA.Accession	q-value	p-value	Period	Lag	JTK.AMP	q-value	p-value	Period	Lag	JTK.AMP	q-value	p-value	Period	Lag	JTK.AMP
6854826	Cbs	NM_144855	2.15461e-06	9.23459e-11	24	4	46135.1	1	1	28.4	13.145	9756.17	0.741167	0.00454255	30	7	22290.6
6760680	Per2	NM_011066	4.78007e-06	4.09744e-10	24	15	2561.78	0.00559603	4.79687e-06	24	13	1387.7	0.373964	0.00107387	28	13.5	659.059
6871627	Dtx4	NM_172442	6.34841e-06	8.28192e-10	24	1	3083.62	1	0.345572	22	1	1837.77	0.924807	0.00776882	30	4.5	1962.65
6775674	Cry1	NM_007771	6.34841e-06	1.63254e-09	24	20	3759.33	0.36786	0.0130072	24.6667	17.3333	1931.04	0.0341771	7.32408e-06	28.6667	1	2848.13
6872791	Slc16a12	NM_172838	6.34841e-06	1.63254e-09	24	13	19424.3	0.946178	0.0842688	26	12	2746.69	0.307197	0.00078998	26	22	7671.9
6934938	Por	NM_008898	6.34841e-06	1.63254e-09	24	14	84095.8	0.0434602	0.000216072	24	13	34613.7	1	0.0100785	28	23	44971.2
6870028	Elovl3	NM_007703	1.04776e-05	3.14347e-09	24	1	83056.1	1	1	28.4	18.815	18948	1	0.128645	30	3.5	91543.7
6872878	Ppp1r3c	NM_016854	1.38149e-05	5.92101e-09	24	23	8641.27	0.540748	0.0271394	24	21	2384.15	1	0.0271394	32	0	2150.17
6918694	Mthfr	NM_010840	1.38149e-05	5.92101e-09	24	23	843.791	0.0990341	0.00107387	24	20	172.675	0.842323	0.00595676	30	1	833.255
6989922	Clpx	NM_011802	1.38149e-05	5.92101e-09	24	23	31146	0.00122784	6.12947e-08	24	23	16203.8	0.373964	0.00107387	28	7	16016.2
6822946	Nr1d2	NM_011584	1.96066e-05	1.09243e-08	24	10.5	17180.2	0.0376854	0.000153442	24	8	4053.7	0.842323	0.00595676	32	18	4070.04
6869796	Marveld1	BC054384	1.96066e-05	1.09243e-08	24	15	4262.16	0.016353	2.45309e-05	24	13	2678.1	1	0.15798	28	14	1265.08
6885412	BC029214	BC029214	1.96066e-05	1.09243e-08	24	0	4543.8	1	1	28.4	14.56	212.157	1	0.15798	34	4	510.107
6792691	Tbc1d16	NM_172443	3.07457e-05	1.97662e-08	22	10	448.094	0.24129	0.00595676	22	13	108.046	1	0.15798	22	4	111.086
6877398	Upp2	NM_029692	3.07457e-05	1.97662e-08	24	12.5	66183.4	0.211129	0.00454255	22	11	18018.7	0.56112	0.00259733	32	18	18441.2
6748837	Npas2	NM_008719	3.72379e-05	3.5112e-08	24	1	280.863	0.0376854	0.000153442	24	22	451.276	0.0341771	4.79687e-06	30	4.5	707.955
6775258	Pdxk	NM_172134	3.72379e-05	3.5112e-08	24	16	6795.79	1	0.597883	26	13	1860.4	1	1	28.4	15.585	219.123
6832132	Tef	NM_017376	3.72379e-05	3.5112e-08	24	12	14795.6	0.00557779	3.10781e-06	24	13	3028.75	0.373964	0.00107387	28	23	3382.45
6845553	Adprh	NM_007414	3.72379e-05	3.5112e-08	24	1	351.432	1	1	28.4	10.39	28.2963	1	1	28.4	12.57	36.1805
6867609	Chka	NM_013490	3.72379e-05	3.5112e-08	24	23	4584.31	0.279725	0.00776882	24	19	2063.69	0.307197	0.00078998	30	4	2600.67
6983163	Rfxank	NM_011266	3.72379e-05	3.5112e-08	24	22	861.044	1	0.345572	24	20	345.351	1	1	28.4	12.285	202.026
6998893	Tmie	NM_146260	3.72379e-05	3.5112e-08	24	23	2005.71	1	1	28.4	17.555	368.302	1	0.0432758	25.3333	8.33333	993.579
6791282	Nr1d1	NM_145434	4.93147e-05	6.12947e-08	26	7	6267.58	0.0376854	0.000153442	24	6	848.033	0.155657	0.000153442	27	17	2778.12
6837812	Tymp	NM_138302	4.93147e-05	6.12947e-08	24	1.5	3244.42	0.15381	0.00259733	22	4	1555.21	1	0.128645	28	9	2170.75
6864696	Apbb3	NM_146085	4.93147e-05	6.12947e-08	24	13	301.793	0.13439	0.00194684	22	13	269.054	1	1	28.4	13.985	106.409
6926225	Alpl	NM_007431	4.93147e-05	6.12947e-08	22	17	832.972	0.0845496	0.00078998	24	15	343.088	1	1	28.4	12.75	118.473
6963558	Arntl	NM_007489	4.93147e-05	6.12947e-08	24	23	4371.48	0.0190961	3.60118e-05	24	21	2351.48	0.924807	0.00776882	30	5	2844.34
6964364	Hsd3b7	NM_133943	4.93147e-05	6.12947e-08	22	5	30177.8	0.540748	0.0271394	24	4	27258.7	1	0.054277	32	11.5	16713.4
6970846	Gde1	NM_019580	4.93147e-05	6.12947e-08	24	15	9645.64	0.11916	0.00145043	24	14	6283.63	1	0.0130072	27	13.5	4709.97
6937227	Spon2	NM_133903	6.47636e-05	8.32722e-08	22	3	674.58	0.00557779	3.10781e-06	24	1	518.239	1	1	28.4	11.995	79.873
6762353	Adora1	NM_001008533	7.01625e-05	1.0525e-07	26	9	769.261	0.0845496	0.00078998	26	9	487.126	1	1	28.4	17.48	56.7015
6788172	Tcf7	NM_009331	7.01625e-05	1.0525e-07	22	9	151.038	1	0.846691	14	4	73.1856	0.842323	0.00595676	34	15	141.28
6818944	Pnp1	ENSMUST00000048615	7.01625e-05	1.0525e-07	26	24	901.985	0.13439	0.00194684	24	21	449.508	0.445283	0.00145043	27	6	765.867
6960404	Dbp	NM_016974	7.01625e-05	1.0525e-07	24	11	4693.28	0.0434602	0.000216072	24	9	216.728	1	0.175608	30	19	188.232
6963418	Wee1	NM_009516	7.01625e-05	1.0525e-07	24	14	5336.68	0.325243	0.0100785	25	13	1107.82	1	0.0343495	28	22	547.725
6761733	Insig2	NM_133748	9.88367e-05	1.77916e-07	24	0.5	38127.6	1	1	28.4	18.315	2745.8	1	1	28.4	12.49	8711.83
6775451	Tjp3	NM_013769	9.88367e-05	1.77916e-07	26	24	2315.14	1	1	28.4	14.25	169.808	1	0.260609	30	6	886.995
6799524	Rnf144a	NM_001081977	9.88367e-05	1.77916e-07	26	24	888.904	1	0.193236	20	2	287.722	0.924807	0.00776882	34	2	362.322
6848215	Zfp295	NM_175428	9.88367e-05	1.77916e-07	24	21	626.709	0.028443	7.55815e-05	24	17	378.939	0.220187	0.000301988	28	2	682.641
6899520	S100a10	NM_009112	9.88367e-05	1.77916e-07	24	2	65480.6	1	1	28.4	17.055	9038.15	1	1	28.4	10.975	11116.2
6913193	1300002K09Rik	BC111889	9.88367e-05	1.77916e-07	24	2	19432.8	1	1	28.4	16.35	1441.63	1	0.0432758	30	6	10961.4
6942193	Asl	NM_133768	9.88367e-05	1.77916e-07	24	18	58005.6	1	0.285775	24.6667	16.6667	25290.6	1	0.235442	30	27	19861.4
6759642	Mreg	NM_001005423	0.000132951	2.96307e-07	22	2	4531.42	0.0845496	0.00078998	22	2	2079.67	1	1	28.4	11.9	826.6
6764342	Grem2	NM_011825	0.000132951	2.96307e-07	24	11	786.232	1	1	28.4	15.3	20.9487	0.56112	0.00259733	32	19	382.05
6781984	Per1	NM_011065	0.000132951	2.96307e-07	24	13	1125.08	0.0222274	5.23961e-05	22	12	1051.33	1	0.0167025	26	24	523.259
6786045	Ddc	NM_016672	0.000132951	2.96307e-07	24	23	27978.1	0.325243	0.0100785	27.3333	16.6667	5039.93	1	1	28.4	12.245	9528.08
6799205	Lpin1	NM_015763	0.000132951	2.96307e-07	24	13	29594.3	0.11916	0.00145043	22	12	8112.07	1	0.021342	26	24	4429.25
6836358	Ndrg1	NM_008681	0.000132951	2.96307e-07	24	2.5	1949.92	0.0630733	0.000419011	20	5	3772.7	0.924807	0.00776882	28	7	1904.52
6848505	Synj2	NM_001113353	0.000132951	2.96307e-07	24	11	87.8934	0.606236	0.0343495	26	9	143.826	1	0.548847	36	16	85.1357
6868511	BC016495	BC016495	0.000132951	2.96307e-07	26	14	5530.49	0.00422279	1.99086e-06	28	14	1918.52	1	1	28.4	13.805	163.604
6965206	Tspan4	NM_053082	0.000132951	2.96307e-07	24	17	9966.88	1	0.285775	14	11	1831.19	0.155657	0.000108124	28	27	1594.1
6995810	Nrg4	NM_032002	0.000132951	2.96307e-07	24	13	1855.45	1	0.846691	24	10.5	115.718	1	1	28.4	14.795	41.1589
6753179	Ppp1r15b	NM_133819	0.000174642	4.8653e-07	24	16	1480.47	0.182667	0.00344478	24	14	2032.58	1	0.0343495	24	5.5	1753.91
6840115	St6gal1	NM_145933	0.000174642	4.8653e-07	22	7	8460.11	1	0.104334	24	2	2773.27	1	1	28.4	11.305	134.531
6860119	Ankhd1	NM_175375	0.000174642	4.8653e-07	26	15	6008.71	0.0845496	0.00078998	24	13.5	1643.32	1	1	28.4	16.945	361.275
6867972	Ubxn1	NM_146093	0.000174642	4.8653e-07	22	5	3168.26	0.0128763	1.65562e-05	22	5	2828.29	1	0.0100785	28	14	703.359
6873194	Loxl4	NM_053083	0.000174642	4.8653e-07	22	2	377.878	1	0.499811	22	0	176.07	0.244409	0.000419011	30	6	379.716
6882397	Dnmt3b	NM_001003961	0.000174642	4.8653e-07	24	23	470.721	0.24129	0.00595676	24	20.5	138.31	1	0.193236	32	5	244.518
6896428	Slc2a2	NM_031197	0.000174642	4.8653e-07	24	12	61488	0.839358	0.067776	22	10	26849.1	0.220187	0.000301988	28	19	36578
6899572	Rorc	NM_011281	0.000174642	4.8653e-07	24	18	31607.4	0.211129	0.00454255	26	18	5037.99	1	0.067776	24	5	11212.9
6918699	Mad2l2	NM_027985	0.000174642	4.8653e-07	24	2	1670.4	0.0350383	0.000108124	22	3	612.991	1	0.846691	18	0	188.656
6927085	Per3	NM_011067	0.000174642	4.8653e-07	24	13	3119.9	0.0036759	7.88148e-07	24	12.5	448.518	0.924807	0.00776882	28	22	245.437
6936104	Crot	NM_023733	0.000174642	4.8653e-07	22	5	130173	0.0222274	5.23961e-05	22	5	60022.6	1	0.0432758	26.6667	14	43599.7
6977814	Gpt2	NM_173866	0.000174642	4.8653e-07	24	14	22237	0.0222274	5.23961e-05	22	13	16121.5	1	0.104334	26	23	3990.77
6988636	Slc37a4	NM_008063	0.000174642	4.8653e-07	24	14	26030.9	0.0376854	0.000153442	22	13	45466.3	1	0.054277	26	24	7055.79
6775389	Mknk2	NM_021462	0.000238819	7.88148e-07	23	13.5	12980.4	0.420845	0.0167025	24	11	2843.7	1	1	28.4	13.945	403.12
6786516	1110067D22Rik	NM_173752	0.000238819	7.88148e-07	24	22	11292.6	0.00559603	4.79687e-06	24	21	4251.06	1	0.0167025	30	1	2469.64
6790699	Hlf	NM_172563	0.000238819	7.88148e-07	24	14	4981.64	0.00422279	1.99086e-06	24	13	2087.94	1	0.128645	30	24	722.239
6794293	Nampt	NM_021524	0.000238819	7.88148e-07	24	15	13819.1	0.15381	0.00259733	26	13	3123.15	1	1	28.4	16.255	1179.02
6843130	Mrap	NM_029844	0.000238819	7.88148e-07	24	21	8496.67	1	1	28.4	13.855	2525.48	1	0.345572	12	1	6890.54
6856210	Dpp9	NM_172624	0.000238819	7.88148e-07	24	2	2075.78	1	0.235442	24	18.5	850.048	0.307197	0.00078998	30	4	3123.43
6899835	Fmo5	NM_010232	0.000238819	7.88148e-07	22	17	122837	0.0434602	0.000216072	24	15	48502.7	0.56112	0.00259733	26	3	45090.4
6900180	Slc16a1	NM_009196	0.000238819	7.88148e-07	24	0	9310.4	1	0.499811	22	20	2043.4	1	1	28.4	15.74	92.3312
6951412	Pdk4	NM_013743	0.000238819	7.88148e-07	26	23	2342.08	0.279725	0.00776882	22	2	2317.47	1	1	28.4	10.645	297.15
6957185	Cd9	NM_007657	0.000238819	7.88148e-07	24	4	1923.4	1	1	28.4	12.165	646.446	1	1	28.4	11.08	466.283
6963566	A630005I04Rik	NM_177248	0.000238819	7.88148e-07	24	22	1118.01	0.0434602	0.000216072	22	21	405.879	0.627918	0.00344478	30	4	635.123
6969612	Thrsp	NM_009381	0.000238819	7.88148e-07	24	16	90150.6	0.211129	0.00454255	24	15	33198.4	1	0.021342	24	1	17047.9
6749557	Coq10b	NM_001039710	0.000334173	1.26038e-06	24	13	8358.71	0.0434602	0.000216072	24	13	3737.2	1	0.067776	30	23	2045.38
6753192	Etnk2	NM_175443	0.000334173	1.26038e-06	24	12	6765.6	0.0990341	0.00107387	24	11	13969.6	1	1	28.4	13.865	668.903
6764578	Cabc1	NM_023341	0.000334173	1.26038e-06	24	1	34570.1	0.011737	1.1067e-05	22	4	22477.2	1	0.499811	28	11	14399.6
6784787	Arsg	NM_028710	0.000334173	1.26038e-06	22	5	1046.09	1	0.193236	24	3	318.834	1	0.0432758	30	12	200.182
6794294	Gdap10	BC052902	0.000334173	1.26038e-06	24	13	1535.62	0.679025	0.0432758	25.2	13.6	547.272	1	1	28.4	14.33	54.9843
6835045	Ncald	NM_134094	0.000334173	1.26038e-06	24	3	541.856	1	0.104334	20	2	323.572	1	0.285775	32	6.5	399.232
6857809	Abcg5	NM_031884	0.000334173	1.26038e-06	22	11	25133.8	0.0630733	0.000419011	26	6	15084.4	0.627918	0.00344478	26	18	20168.1
6868180	EG240549	BC089619	0.000334173	1.26038e-06	22	5	20151.6	0.15381	0.00259733	22	5	19110.6	1	0.067776	26	16	21217.7
6921208	Gne	NM_015828	0.000334173	1.26038e-06	24	11	14043	1	0.597883	24	5	5837.73	1	1	28.4	13.315	1310.6
6934933	Rhbdd2	NM_146002	0.000334173	1.26038e-06	24	14	3572.37	0.016353	2.45309e-05	26	11	1427.65	1	0.0271394	24	23	1015.26
6968845	Homer2	NM_011983	0.000334173	1.26038e-06	26	13	424.688	1	1	28.4	14.3	146.679	1	0.0167025	26	23.5	218.249
6750532	Pnkd	NM_001039509	0.000459908	1.99086e-06	24	11.5	6386.09	0.474693	0.021342	24	18	2773.56	0.220187	0.000301988	30	3.5	5307.61
6763273	Tor3a	NM_023141	0.000459908	1.99086e-06	26	22	922.845	1	0.345572	16	9	558.402	1	1	28.4	14.725	221.239
6790012	Lgals9	NM_010708	0.000459908	1.99086e-06	24	4	47756.6	1	0.235442	22	6	25014.3	0.220187	0.000301988	26	14	12444.5
6823742	Hacl1	NM_019975	0.000459908	1.99086e-06	24	22.5	71239	0.11916	0.00145043	24	23	15218.4	1	1	28.4	15.055	2913.82
6833387	Tenc1	NM_153533	0.000459908	1.99086e-06	24	9	2641.26	0.279725	0.00776882	26	10	1331.13	1	1	28.4	12.54	177.966
6837604	Celsr1	NM_009886	0.000459908	1.99086e-06	24	21	1238.64	0.0434602	0.000216072	24	18	873.913	0.244409	0.000419011	28	4.5	1095.59
6849595	Cdkn1a	NM_007669	0.000459908	1.99086e-06	25	21	430.769	1	0.416347	24	12	262.054	1	0.499811	28	1.5	567.276
6897337	Ccrn4l	NM_009834	0.000459908	1.99086e-06	24	14	2894.26	0.0845496	0.00078998	22	13	3677.31	0.0430357	1.1067e-05	28	27	1632.71
6913042	Glipr2	NM_027450	0.000459908	1.99086e-06	26	0	175.787	1	0.285775	20	9.33333	14.1657	1	1	28.4	14.125	17.3446
6968027	Lrrc28	NM_175124	0.000459908	1.99086e-06	24	15	2518.15	1	0.345572	24	13	1546.8	1	1	28.4	15.585	192.307
6980364	Col4a1	NM_009931	0.000459908	1.99086e-06	24	4	454.953	1	1	28.4	15.165	13.3746	1	1	28.4	13.69	0
6992431	Scap	NM_001001144	0.000459908	1.99086e-06	22	8	5412.97	0.0845496	0.00078998	26	3	6210.02	1	0.193236	30	14	3870.21
6998643	Slc38a3	NM_023805	0.000459908	1.99086e-06	24	10	82681	0.36786	0.0130072	24	8	66286.5	1	0.0343495	32	14	42993.6
6871471	Fads2	NM_019699	0.000583147	2.54933e-06	24	13	79202.7	1	0.597883	32	10	23727.8	1	1	28.4	16.475	0
6771309	Avpr1a	NM_016847	0.000630533	3.10781e-06	26	24	11762.6	1	0.235442	22	2	4471.53	1	0.193236	28	5.5	1399.58
6813246	Nfil3	NM_017373	0.000630533	3.10781e-06	24	0	7347.69	0.15381	0.00259733	24	22	4294.4	1	0.104334	36	35	689.076
6848677	Park2	NM_016694	0.000630533	3.10781e-06	26	8	123.532	0.0036759	1.26038e-06	26	7	212.839	0.244409	0.000419011	30	16	184.767
6867978	B3gat3	NM_024256	0.000630533	3.10781e-06	24	1	1232.35	1	1	28.4	13.03	0	1	0.0842688	28	4	1156.26
6884750	Itga8	NM_001001309	0.000630533	3.10781e-06	22	6	452.831	1	0.235442	22	7	295.288	1	1	28.4	11.635	73.2955
6892256	Commd7	NM_133850	0.000630533	3.10781e-06	24	1	430.416	0.24129	0.00595676	22	1.5	244.588	1	0.193236	32	5	215.173
6898686	Pdgfc	NM_019971	0.000630533	3.10781e-06	24	0	794.505	0.24129	0.00595676	24	15	448.659	1	1	28.4	11.52	125.474
6907246	Hist2h3c1	NM_178216	0.000630533	3.10781e-06	22	20	496.248	0.839358	0.067776	24.6667	16.6667	532.074	0.924807	0.00776882	26	5	567.665
6934670	Caln1	NM_181045	0.000630533	3.10781e-06	24	16.5	538.957	1	1	28.4	11.575	6.84939	1	0.0271394	30	29	162.564
6946954	St3gal5	NM_011375	0.000630533	3.10781e-06	24	14.5	52168.1	0.028443	7.55815e-05	24	11	23577.1	1	0.0130072	28	23	22053.4
6958058	Gys2	NM_145572	0.000630533	3.10781e-06	24	14	38042.9	0.606236	0.0343495	18	9	9006.7	1	0.0432758	26	17	3412
6965192	Eps8l2	NM_133191	0.000630533	3.10781e-06	22	4	2520.69	0.13439	0.00194684	22	4	2226.11	1	0.0100785	32	7	1565.11
6988604	Usp2	NM_198092	0.000630533	3.10781e-06	24	13	6019.11	0.0190961	3.60118e-05	24	13	991.434	0.201655	0.000216072	28	26	466.761
6772104	Rab32	NM_026405	0.000902585	4.79687e-06	26	24.5	2343.92	1	1	28.4	10.37	407.217	1	1	28.4	11.15	180.436
6817978	Tnnc1	NM_009393	0.000902585	4.79687e-06	24	17	485.429	1	0.285775	20	19	20.0818	1	1	28.4	14.955	10.649
6907638	Atp1a1	NM_144900	0.000902585	4.79687e-06	24	14.5	24262.2	0.0190961	3.60118e-05	24	13	17329.1	1	0.235442	30	23	15196.9
6918029	Tmco4	NM_029857	0.000902585	4.79687e-06	22	9	668.428	0.325243	0.0100785	26	3	791.96	1	0.597883	30	13.5	562.362
6925149	Mfsd2	NM_029662	0.000902585	4.79687e-06	24	14	15567.3	0.0990341	0.00107387	24	12.5	18492.9	1	0.597883	26	1	10083.9
6930845	Slc34a2	NM_011402	0.000902585	4.79687e-06	22	2	647.215	1	0.846691	26	19	289.207	1	1	28.4	12.805	118.867
6966903	Atf5	NM_030693	0.000902585	4.79687e-06	24	3	5999.8	0.474693	0.021342	20	3	2033.36	1	0.104334	34	3	4950.03
6967211	E2f8	NM_001013368	0.000902585	4.79687e-06	24	23	368.403	1	0.193236	24	21	9.40452	1	1	28.4	15.845	62.5747
6999645	Cdcp1	NM_133974	0.000902585	4.79687e-06	24	23	287.722	1	1	28.4	15.885	78.3602	1	0.597883	12	2	149.836
6751264	Psmd1	NM_027357	0.00122939	7.32408e-06	24	0	105.076	1	1	28.4	11.91	8.83954	1	1	28.4	9.67	28.449
6780438	Rnf145	NM_028862	0.00122939	7.32408e-06	24	12	2521.26	1	0.597883	30	10	733.128	1	1	28.4	17.735	470.729
6806831	Rnf144b	NM_146042	0.00122939	7.32408e-06	24	23	2515.82	1	1	28.4	18.345	1601.31	1	1	28.4	15.83	1583.73
6837318	Tob2	NM_020507	0.00122939	7.32408e-06	24	13	1182.14	0.420845	0.0167025	22	10	397.394	1	1	28.4	11.045	63.6354
6839078	Mgrn1	NM_029657	0.00122939	7.32408e-06	24	10	2454.79	0.0732044	0.000577302	28	5	1926.02	1	0.345572	26	21	402.132
6849567	Mapk14	NM_011951	0.00122939	7.32408e-06	24	16	6006.38	0.0845496	0.00078998	24	14.5	4240.38	1	0.597883	24	6	2729.57
6850507	Gpr110	NM_133776	0.00122939	7.32408e-06	22	7	995.182	1	1	28.4	12.3	539.211	1	1	28.4	10.315	613.633
6885901	Fpgs	NM_010236	0.00122939	7.32408e-06	24	23	13655.3	1	1	28.4	12.4	1381.22	1	1	28.4	11.455	2433.68
6901745	Adh4	NM_011996	0.00122939	7.32408e-06	24.6667	3	26966.7	0.839358	0.067776	26	0	31355.1	1	0.712712	10	3	2636.31
6926498	Efhd2	NM_025994	0.00122939	7.32408e-06	26	11	2538.3	0.606236	0.0343495	24	12.5	825.795	1	0.0100785	24	1	1010.67
6943168	Slc46a3	NM_027872	0.00122939	7.32408e-06	20	16	13867.1	1	0.846691	22	14	1460.46	1	1	28.4	16.45	3115.45
6955376	Abtb1	NM_030251	0.00122939	7.32408e-06	22	8	1287.01	0.13439	0.00194684	24	4	1079.47	1	0.0167025	30	15	866.277
6963534	Mical2	NM_177282	0.00122939	7.32408e-06	26	23	813.738	1	1	28.4	12.045	166.799	1	1	28.4	13.355	280.207
6972418	Osbpl5	NM_024289	0.00122939	7.32408e-06	24	14	166.17	1	1	28.4	16.265	5.57377	1	1	28.4	12.555	5.68726
6984993	Gfod2	NM_027469	0.00122939	7.32408e-06	24	23	291.399	1	1	28.4	12.23	37.2638	1	0.193236	25	6	259.685
6754138	Rgs16	NM_011267	0.00162399	1.1067e-05	24	9.5	1219.97	1	1	28.4	15.165	79.4958	1	0.597883	28	15	206.051
6763777	Mpzl1	NM_001083897	0.00162399	1.1067e-05	24	0	750.735	0.0732044	0.000577302	22	2	357.513	1	0.128645	30	6	200.182
6771920	Mthfd1l	NM_172308	0.00162399	1.1067e-05	22	15	132.088	1	1	28.4	11.37	4.36108	1	1	28.4	15.1	9.37447
6797707	Glrx5	NM_028419	0.00162399	1.1067e-05	24	16	5099.87	1	1	28.4	12.155	1996.78	1	0.054277	30	23.5	3089.14
6817287	Nid2	NM_008695	0.00162399	1.1067e-05	24	0	508.693	1	1	28.4	13.495	63.1871	1	1	28.4	10.93	92.7226
6823068	Anxa7	NM_009674	0.00162399	1.1067e-05	24	12	2429.19	0.474693	0.021342	24	6	1837.42	1	1	28.4	13.65	899.06
6834013	Tars	NM_033074	0.00162399	1.1067e-05	24	0	10011.8	0.679025	0.0432758	24	22	1767.63	1	0.193236	36	1	2500.54
6842940	Bach1	NM_007520	0.00162399	1.1067e-05	24	11	736.947	1	1	28.4	18.175	170.523	1	1	28.4	14.54	14.9854
6864837	Fgf1	NM_010197	0.00162399	1.1067e-05	24	18	13539.8	0.606236	0.0343495	26	18	9087.52	1	0.597883	24	5.5	3634.6
6870897	Grk5	NM_018869	0.00162399	1.1067e-05	24	1	887.419	0.839358	0.067776	22	1	437.841	1	0.0271394	33	4	1149.47
6879054	Lrp4	NM_172668	0.00162399	1.1067e-05	24	14	1437.62	1	0.128645	27	12	173.312	1	1	28.4	12.695	30.6891
6884441	Mcm10	NM_027290	0.00162399	1.1067e-05	26	10	371.231	0.679025	0.0432758	22	10	413.445	1	1	28.4	13.39	31.3287
6926376	Klhdc7a	NM_173427	0.00162399	1.1067e-05	24	8	972.838	1	1	28.4	12.94	272.099	1	1	28.4	12.21	149.779
6956509	Srgap3	NM_080448	0.00162399	1.1067e-05	24	0	216.445	0.679025	0.0432758	27	20.5	14.3543	1	0.104334	32	7	70.3571
6956913	Wnt5b	NM_009525	0.00162399	1.1067e-05	23	17.5	508.162	1	0.712712	26	17	52.0431	1	0.193236	30	28	48.154
6969017	2210412D01Rik	NM_133722	0.00162399	1.1067e-05	24	3	4843.68	1	0.712712	18	6	3047.63	1	1	28.4	10.795	1152.95
6970378	St5	NM_001001326	0.00162399	1.1067e-05	24	23	3448.14	0.0222274	5.23961e-05	22	0	2044.88	1	0.285775	34	3	1891.44
6972425	Nadsyn1	NM_030221	0.00162399	1.1067e-05	24	10	481.045	0.679025	0.0432758	24	9	260.781	1	0.0842688	30	16	178.262
6980990	Agpat6	NM_018743	0.00162399	1.1067e-05	24	15	4894.66	1	0.104334	24	14	4941.47	1	0.0167025	26	2	4497.91
6988194	Tmem218	ENSMUST00000034632	0.00162399	1.1067e-05	26	1	1740.05	0.00122784	1.0525e-07	22	2	748.897	0.842323	0.00595676	26	12	560.311
6760289	5033414K04Rik	BC080290	0.00223288	1.65562e-05	26	25	5395.37	1	1	28.4	15.625	538.418	1	1	28.4	11.005	915.587
6823011	Kcnk5	NM_021542	0.00223288	1.65562e-05	24	13	3614.02	0.0630733	0.000419011	22	11	3063.96	1	1	28.4	15.79	91.0457
6848556	Unc93a	NM_199252	0.00223288	1.65562e-05	22	8	338.28	0.540748	0.0271394	22	6	359.705	0.741167	0.00454255	24	17.5	237.022
6854604	Fkbp5	NM_010220	0.00223288	1.65562e-05	26	13	5265.61	1	0.846691	24	11	816.567	1	1	28.4	16.85	281.489
6856202	2310076L09Rik	NM_001077348	0.00223288	1.65562e-05	24	19	2276.04	0.15381	0.00259733	24	13	3946.72	0.842323	0.00595676	26	1	4027.68
6916586	Tesk2	NM_146151	0.00223288	1.65562e-05	22	12	929.916	1	1	28.4	11.695	226.33	1	1	28.4	14.11	72.3724
6947814	Mgll	NM_011844	0.00223288	1.65562e-05	24	14	7987.27	0.763806	0.054277	26	13	2851.76	1	0.597883	26	24	267.286
6955164	Cml5	NM_023493	0.00223288	1.65562e-05	22	19	835.659	1	1	28.4	17.235	12.9485	1	1	28.4	13.055	12.6378
6959265	Cyp2a4	NM_009997	0.00223288	1.65562e-05	24	14.5	55708.3	0.36786	0.0130072	22	12.5	52645.4	1	0.0842688	24	0	7570.14
6964090	Aqp8	NM_007474	0.00223288	1.65562e-05	26	24	56728.3	0.279725	0.00776882	26	24	38178.6	1	1	28.4	10.525	4312.19
6972410	Cars	NM_013742	0.00223288	1.65562e-05	24	5	1079.47	0.24129	0.00595676	25	4.5	1563.52	1	1	28.4	10.89	267.731
6984358	Ces3	NM_053200	0.00223288	1.65562e-05	28	18	36004	1	1	28.4	13.49	6376.37	0.0551841	1.65562e-05	28	26	22861
6998564	Alas1	NM_020559	0.00223288	1.65562e-05	24	14	108954	0.0350383	0.000108124	24	12	136804	1	0.0842688	26	24.5	81315.7
7019818	Tsc22d3	NM_001077364	0.00223288	1.65562e-05	24	17	2336.49	0.0630733	0.000419011	22	13	3013.83	1	0.067776	26	24	1971.84
6769535	Timp3	NM_011595	0.00306072	2.45309e-05	25	13.5	1032.66	1	0.712712	26	13	426.598	1	1	28.4	10.83	36.7685
6784829	Map2k6	NM_011943	0.00306072	2.45309e-05	24	12	757.382	1	1	28.4	11.525	62.7727	1	0.0343495	35	14.5	205.238
6785115	Slc9a3r1	NM_012030	0.00306072	2.45309e-05	22	15	10603.5	1	0.15798	26	13	6137.47	1	1	28.4	15.475	651.43
6817617	Ppif	NM_134084	0.00306072	2.45309e-05	24	14	1460.32	0.946178	0.0842688	24	12	1908.06	1	1	28.4	14.89	97.311
6835759	Enpp2	NM_015744	0.00306072	2.45309e-05	24	13	8785.94	0.0845496	0.00078998	22	11	7695.51	1	0.054277	26	21	5979.22
6868058	Slc15a3	NM_023044	0.00306072	2.45309e-05	24	3	566.746	1	0.499811	26	21	410.122	1	1	28.4	13.195	65.5587
6870617	Nhlrc2	NM_025811	0.00306072	2.45309e-05	24	13	2148.47	1	0.15798	24	13	278.883	1	0.235442	32	25	203.01
6881837	Sec23b	NM_019787	0.00306072	2.45309e-05	12	3	2415.05	0.0990341	0.00107387	24	13	11122.9	1	0.416347	12	0	505.228
6886039	Stom	NM_013515	0.00306072	2.45309e-05	24	4	4530.72	1	1	28.4	13.95	1453.05	1	1	28.4	10.035	925.988
6903753	Ect2	NM_007900	0.00306072	2.45309e-05	24	21	111.652	1	1	28.4	13.905	14.3384	1	1	28.4	14.295	20.0228
6916719	2610528J11Rik	BC022764	0.00306072	2.45309e-05	24	2	1383.17	1	1	28.4	15.71	346.983	0.924807	0.00776882	30	10	1527.42
6949583	Pex26	NM_028730	0.00306072	2.45309e-05	26	12	586.969	0.0376854	0.000153442	24	12.5	270.468	1	1	28.4	14.81	80.6682
6973735	Map2k7	NM_011944	0.00306072	2.45309e-05	24	7	667.862	1	1	28.4	11.76	255.325	1	0.235442	12	2	342.523
6992974	Trak1	NM_175114	0.00306072	2.45309e-05	26	11	1549.34	1	0.193236	26	11	497.732	1	1	28.4	11.625	55.1147
6775206	Adarb1	NR_004429	0.00373699	3.02713e-05	24	12.5	480.338	0.0845496	0.00078998	24	12	137.886	1	1	28.4	16.285	68.0643
6799525	Rsad2	NM_021384	0.00373699	3.02713e-05	22	4	726.764	1	1	28.4	9.075	118.743	1	1	28.4	13.34	173.584
6762197	Pctk3	NM_008795	0.00383665	3.60118e-05	22	14	2307.57	0.13439	0.00194684	24	12	452.902	1	1	28.4	13.33	388.02
6768323	Slc25a16	NM_175194	0.00383665	3.60118e-05	26	12	5154.74	1	0.15798	14	8	2810.18	1	0.846691	24	21.5	329.087
6771884	Esr1	NM_007956	0.00383665	3.60118e-05	24	18	6067.47	1	1	28.4	11.34	329.205	1	0.416347	12	1	1227.82
6783945	Lasp1	NM_010688	0.00383665	3.60118e-05	24	1	13737.1	1	0.846691	40	39	3483.28	1	0.193236	26	9	9468.8
6785369	Slc26a11	NM_178743	0.00383665	3.60118e-05	22	10	280.792	0.606236	0.0343495	27	7	298.046	1	1	28.4	11.51	47.9295
6792756	2310003H01Rik	NM_027980	0.00383665	3.60118e-05	22	8	271.529	1	1	28.4	13.49	29.6645	0.924807	0.00776882	34	10	191.202
6807564	Dapk1	NM_029653	0.00383665	3.60118e-05	24	23	12250.8	0.0845496	0.00078998	22	21	5172.7	1	0.021342	26	9	4300.84
6810782	Pfkp	NM_019703	0.00383665	3.60118e-05	24	2	104.015	1	1	28.4	15.475	18.9872	1	1	28.4	11.28	25.9491
6818707	Fbxo34	NM_030236	0.00383665	3.60118e-05	22	12	231.931	1	1	28.4	10.585	71.5433	1	1	28.4	14.81	31.6787
6819883	Pbk	NM_023209	0.00383665	3.60118e-05	22	1	39.0323	1	1	28.4	12.215	8.09955	1	0.597883	14	8.5	24.4305
6849536	Ppard	NM_011145	0.00383665	3.60118e-05	26	23	790.828	0.839358	0.067776	24	20	243.598	0.155657	0.000153442	32	4	617.941
6850074	Ehmt2	NM_145830	0.00383665	3.60118e-05	22	8	653.791	1	0.345572	26	4	185.898	1	1	28.4	10.745	161.461
6867566	Cpt1a	NM_013495	0.00383665	3.60118e-05	24	11	28338	0.36786	0.0130072	24	7	27490	1	0.0842688	30	16	28384
6868884	Smarca2	NM_011416	0.00383665	3.60118e-05	24	14	1829.29	1	0.597883	14	5	1024.74	1	1	28.4	10.48	194.218
6869893	Abcc2	NM_013806	0.00383665	3.60118e-05	24	9	29754.4	0.211129	0.00454255	25	6.5	18809.3	0.280617	0.000577302	28	17.5	21428.7
6873503	Sh3pxd2a	NM_008018	0.00383665	3.60118e-05	24	2	677.408	1	0.345572	18	6	315.723	1	0.416347	30	4	368.756
6876735	Kynu	NM_027552	0.00383665	3.60118e-05	22	2	23038.9	1	1	28.4	12.78	724.821	0.56112	0.00259733	28	6	22922.3
6908088	Gstm4	NM_026764	0.00383665	3.60118e-05	25	5	2177.92	1	0.345572	28	2.5	5644.97	1	1	28.4	11.415	2096.7
6913020	Npr2	NM_173788	0.00383665	3.60118e-05	24	10.5	2544.31	1	1	28.4	13.335	649.535	1	1	28.4	12.175	500.167
6925885	Wdtc1	NM_199306	0.00383665	3.60118e-05	23	6.5	2773.45	0.24129	0.00595676	22	5	2259.14	1	1	28.4	10.775	746.95
6931529	Atp10d	NR_003966	0.00383665	3.60118e-05	24	13	137.462	1	1	28.4	14.845	14.4349	1	1	28.4	13.585	2.79201
6932240	Slc4a4	NM_018760	0.00383665	3.60118e-05	24	5	4608.07	0.211129	0.00454255	22	5	6349.47	1	0.054277	28	14	4722.48
6933805	Fbxo21	NM_145564	0.00383665	3.60118e-05	22	8	14792.7	0.0376854	0.000153442	24	5	7169.71	1	0.021342	30	16	10470.2
6941710	Cux2	NM_007804	0.00383665	3.60118e-05	24	10	535.209	1	1	28.4	12.315	86.6008	1	1	28.4	11.755	44.2985
6963540	Micalcl	AB359922	0.00383665	3.60118e-05	24	22	138.31	1	1	28.4	13.15	20.5761	1	0.067776	31	15.5	30.4763
6968842	9330120H11Rik	ENSMUST00000098326	0.00383665	3.60118e-05	22	14	4361.29	1	1	28.4	13.745	351.458	1	1	28.4	15.935	309.007
6971490	Fgfr2	NM_010207	0.00383665	3.60118e-05	22	7	1017.46	1	0.597883	21	3.5	198.556	1	1	28.4	10.45	185.864
6971987	Bnip3	NM_009760	0.00383665	3.60118e-05	24	13	9271.3	1	1	28.4	16.955	835.139	0.244409	0.000419011	28	22	5291.42
6985399	Bcar1	NM_009954	0.00383665	3.60118e-05	23	8	1395.19	1	1	28.4	10.64	554.737	1	0.597883	31	14	475.706
6991531	Paqr9	NM_198414	0.00383665	3.60118e-05	24	0	41845.7	0.420845	0.0167025	24	22	26519.9	1	1	28.4	14.05	6399.97
6751709	Bok	NM_016778	0.00507264	5.23961e-05	22	3	457.215	1	0.712712	28	1	340.048	1	1	28.4	11.245	53.3905
6767088	Tspyl4	NM_030203	0.00507264	5.23961e-05	22	1	143.472	1	1	28.4	13.825	2.79272	1	1	28.4	12.27	21.1464
6811714	Slc17a4	NM_177016	0.00507264	5.23961e-05	24	1	6845.64	0.839358	0.067776	20	6	3491.83	1	1	28.4	10.585	566.771
6837819	Chkb	NM_007692	0.00507264	5.23961e-05	22	4	927.017	0.0376854	0.000153442	22	3	708.097	1	0.15798	30	10	403.122
6844819	Cldn1	NM_016674	0.00507264	5.23961e-05	24	0	18013.8	0.24129	0.00595676	22	2	7516.33	0.488427	0.00194684	28	9	7630.81
6852034	Lpin2	NM_022882	0.00507264	5.23961e-05	24	13	12129.6	1	1	28.4	15.17	514.268	1	1	28.4	14.46	1172.62
6855625	Tmem63b	NM_198167	0.00507264	5.23961e-05	26	11	2994.17	1	0.416347	30	9	1549.48	1	0.499811	40	0	373.352
6861576	Nedd4l	NM_031881	0.00507264	5.23961e-05	26	22	5565.14	1	0.193236	24	22	226.416	1	0.054277	28	6	1994.47
6875703	Anapc2	NM_175300	0.00507264	5.23961e-05	24	5	1053.94	1	0.235442	22	7	889.47	1	0.499811	31	14	487.656
6876014	Rapgef1	NM_001039087	0.00507264	5.23961e-05	24	12	1253.49	1	1	28.4	13.155	180.891	1	1	28.4	10.715	200.63
6876205	C230093N12Rik	NM_153560	0.00507264	5.23961e-05	23	13.5	4249.82	0.24129	0.00595676	24	12	1182.07	1	1	28.4	15.425	155.384
6889304	Caprin1	NM_016739	0.00507264	5.23961e-05	24	23	23163.3	1	0.499811	26	20	0	0.627918	0.00344478	30	4	14744.4
6916611	Hectd3	NM_175244	0.00507264	5.23961e-05	22	9	1648.9	1	1	28.4	13.785	346.226	1	0.128645	40	11	957.493
6918720	Srm	NM_009272	0.00507264	5.23961e-05	22	16	2258	0.0350383	0.000108124	24	13.5	2913.56	0.924807	0.00776882	28	27	667.155
6918858	Slc2a5	NM_019741	0.00507264	5.23961e-05	24	11.5	215.173	1	1	28.4	14.235	3.95449	0.220187	0.00025903	33	14	112.996
6924295	Dio1	NM_007860	0.00507264	5.23961e-05	26	14	20070.5	1	1	28.4	13.415	2159.56	1	0.345572	34	20	8383.53
6951302	Tfpi2	NM_009364	0.00507264	5.23961e-05	26	24	17296.8	0.13439	0.00194684	24	0	11301.2	1	1	28.4	14.34	2397.99
6963004	Centd2	NM_001040111	0.00507264	5.23961e-05	24	3	1586.54	0.606236	0.0343495	22	2	1107.4	1	0.499811	40	9	980.191
6969693	Dgat2	NM_026384	0.00507264	5.23961e-05	24	13.5	50895	0.13439	0.00194684	24	12	22212.3	1	1	28.4	16.09	1877.99
6975443	6430573F11Rik	BC052184	0.00507264	5.23961e-05	22	3	328.734	1	0.104334	20	4	402.909	1	1	28.4	10.465	101.48
6979097	Vac14	NM_146216	0.00507264	5.23961e-05	24	16	2055.91	1	1	28.4	13.86	139.43	1	1	28.4	10.115	179.989
6993030	C730027P07Rik	BC113767	0.00507264	5.23961e-05	24	0	1153.93	1	0.15798	20	4	506.218	1	0.0432758	26	10	1179.45
6751339	Neu2	NM_015750	0.00655564	7.55815e-05	24	19.5	450.073	1	0.597883	28	14	62.7911	1	0.712712	28	5	142.482
6783137	Myo19	BC007156	0.00655564	7.55815e-05	24	12	5.9397	1	0.597883	20	13	21.3546	1	1	28.4	12.1	10.5525
6783330	Rnf43	NM_172448	0.00655564	7.55815e-05	22	9	1001.19	1	0.712712	26	9	914.218	1	1	28.4	13.89	167.958
6789450	AI842396	NM_213729	0.00655564	7.55815e-05	23	6.5	1150.11	0.0732044	0.000577302	24	6	1181.65	0.741167	0.00454255	25	18	1583.21
6796768	2310044G17Rik	BC026384	0.00655564	7.55815e-05	24	14	1487.12	0.474693	0.021342	26	13	820.81	1	0.054277	30	26	716.087
6806021	Wrnip1	NM_030215	0.00655564	7.55815e-05	24	0	2454.37	0.00559603	4.79687e-06	22	3	2264.23	1	1	28.4	10.505	534.808
6807609	2010111I01Rik	NM_028079	0.00655564	7.55815e-05	22	15	795.495	1	0.597883	24	12	733.482	1	1	28.4	13.675	79.6004
6831681	Adck5	NM_172960	0.00655564	7.55815e-05	22	3	1253.63	0.839358	0.067776	24	4.5	1146.47	1	0.15798	34	12	791.818
6832532	Pim3	NM_145478	0.00655564	7.55815e-05	24	13	2410.39	0.36786	0.0130072	22	12	2973.24	1	0.0167025	26	24	1131.65
6852753	Abcg8	NM_026180	0.00655564	7.55815e-05	24	9	8535.77	0.0222274	5.23961e-05	26	6	5519.89	0.627918	0.00344478	24.6667	18	1852.81
6854449	9530058B02Rik	BC024332	0.00655564	7.55815e-05	24	17	2269.46	1	0.846691	16	9	459.902	1	1	28.4	13.715	463.289
6870068	Tmem180	NM_029186	0.00655564	7.55815e-05	24	2	232.426	1	1	28.4	12.61	1.41068	1	0.285775	30	4	273.226
6874057	Gfra1	NM_010279	0.00655564	7.55815e-05	24	14	15769.7	1	0.285775	22	13	7715.03	1	1	28.4	16.665	3175.87
6879621	Abtb2	NM_178890	0.00655564	7.55815e-05	26	22	1045.25	0.36786	0.0130072	24	23	644.245	1	0.499811	30	6	608.89
6884281	Dnajc5	NM_016775	0.00655564	7.55815e-05	24	12	625.507	0.679025	0.0432758	24	11.5	449.578	1	1	28.4	12.205	125.328
6897075	Phf17	NM_172303	0.00655564	7.55815e-05	24	8	1596.15	1	0.846691	24	6	422.355	1	0.712712	40	11	552.392
6901334	Pla2g12a	NM_023196	0.00655564	7.55815e-05	22	11	835.376	0.0732044	0.000577302	24	8	594.111	0.741167	0.00454255	25	21	258.377
6921985	D630039A03Rik	BC095953	0.00655564	7.55815e-05	23	6	893.394	1	0.235442	24	5	746.422	1	1	28.4	11.615	129.544
6924832	Plk3	NM_013807	0.00655564	7.55815e-05	24	14	1711.76	0.13439	0.00194684	24	14	1868.11	1	0.15798	26	25	1284.39
6926033	Tmem57	NM_025382	0.00655564	7.55815e-05	24	15	2721.65	0.211129	0.00454255	30	13	1367.76	1	1	28.4	15.655	185.151
6929604	D5Wsu178e	NM_027652	0.00655564	7.55815e-05	24	1	7420.45	1	1	28.4	12.015	644.83	1	1	28.4	12.85	2133.24
6933599	Acacb	NM_133904	0.00655564	7.55815e-05	24	20	9414.42	0.211129	0.00454255	25	21.5	5677.54	1	1	28.4	13.55	812.358
6934122	Pptc7	NM_177242	0.00655564	7.55815e-05	26	11	1369.38	0.11916	0.00145043	22	11	887.49	1	1	28.4	14.245	266.434
6947932	Klf15	NM_023184	0.00655564	7.55815e-05	24	12	5984.53	0.0510579	0.000301988	24	12	7439.89	1	0.067776	28	27	4144.07
6952658	Wdr91	NM_001013366	0.00655564	7.55815e-05	26	25	928.643	1	0.128645	22	4	778.595	1	1	28.4	9.86	351.351
6976901	Lpl	NM_008509	0.00655564	7.55815e-05	26	3	413.375	0.839358	0.067776	22	5	2100.81	1	0.846691	18	3	1207.24
6985006	Slc12a4	NM_009195	0.00655564	7.55815e-05	24	11.5	237.941	0.946178	0.0842688	26	9	185.333	1	1	28.4	11.93	11.2108
6996678	Aqp9	NM_022026	0.00655564	7.55815e-05	22	9	35933.6	0.679025	0.0432758	22	6	33793.8	0.924807	0.00776882	26	17	51912.4
4760044	---	---	0.00861009	0.000108124	24	13	703.783	1	1	28.4	11.86	346.798	1	1	28.4	14.885	19.2878
6751655	Agxt	NM_016702	0.00861009	0.000108124	22	7	11317.9	1	0.846691	28	4	7472.56	1	0.0432758	30	10	3491.55
6753089	Slc45a3	NM_145977	0.00861009	0.000108124	24	21	5986.72	1	1	28.4	12.44	494.417	1	1	28.4	12.77	1397.16
6760446	Ngef	NM_001111314	0.00861009	0.000108124	24	13	1244.58	1	1	28.4	10.785	98.3667	1	1	28.4	10.05	63.8235
6771587	Rdh9	NM_153133	0.00861009	0.000108124	24	12	5207.91	0.946178	0.0842688	26	8	771.029	1	0.0100785	28	23	1907.49
6771637	Apon	NM_133996	0.00861009	0.000108124	26	25	35207.1	1	0.104334	22	2	14704.6	1	0.285775	28	11	21715.7
6796415	4933426M11Rik	BC040401	0.00861009	0.000108124	24	12.5	1640.91	0.839358	0.067776	24	11	665.812	1	1	28.4	14.59	344.133
6813322	4833439L19Rik	BC033445	0.00861009	0.000108124	24	16	13202.7	1	0.416347	24	13.5	3833.23	1	0.846691	28	27	1118.01
6833314	9430023L20Rik	BC016463	0.00861009	0.000108124	23.3333	1.33333	1604.78	1	1	28.4	13.01	1102.91	1	1	28.4	10.41	581.252
6833420	Pcbp2	NM_001103165	0.00861009	0.000108124	26	12	20010	0.839358	0.067776	26	10	18247	1	1	28.4	17.185	1996.98
6835984	Mtss1	NM_144800	0.00861009	0.000108124	24	12	12007.2	0.00138371	1.77916e-07	24	13	15972.2	1	0.0842688	27	25.5	3271.92
6836805	Plec1	NM_201389	0.00861009	0.000108124	26	9	366.493	1	1	28.4	9.7	27.9841	1	1	28.4	11.07	29.6317
6864456	D0H4S114	NM_053078	0.00861009	0.000108124	26	14	7004.74	1	0.235442	30	13	924.259	1	1	28.4	14.345	142.119
6865980	Ppargc1b	NM_133249	0.00861009	0.000108124	24	10.5	245.225	0.839358	0.067776	28	10	153.301	1	1	28.4	9.665	38.1382
6876087	Tor1b	NM_133673	0.00861009	0.000108124	26	13	1982.8	1	1	28.4	11.93	260.62	1	1	28.4	15.89	257.101
6879569	Slc1a2	NM_001077514	0.00861009	0.000108124	24	12	7965.49	0.420845	0.0167025	18	15	8841.8	1	1	28.4	16.515	950.035
6884456	Camk1d	NM_177343	0.00861009	0.000108124	24	0	3829.62	0.0434602	0.000216072	22	2	6150.49	1	0.345572	28	12	2734.66
6905289	Tm4sf1	NM_008536	0.00861009	0.000108124	22	5	1655.83	0.946178	0.0842688	24	4	1332.12	1	0.0100785	24	17	1551.82
6921550	Acnat2	BC010829	0.00861009	0.000108124	24.6667	21.3333	9330.44	0.420845	0.0167025	25	15.5	9689.63	1	0.0130072	28	1	11157.4
6924952	AU022252	BC089614	0.00861009	0.000108124	24	1	2374.46	1	1	28.4	15.985	457.749	1	1	28.4	10.525	1045.18
6934885	Wbscr27	NM_024479	0.00861009	0.000108124	24	5	453.68	0.0376854	0.000153442	24	4	365.221	0.135651	7.55815e-05	30	15	448.447
6937056	Slc5a6	NM_177870	0.00861009	0.000108124	24	11	1007.06	0.0510579	0.000301988	24	11	430.628	1	1	28.4	16.05	93.4831
6985877	Fbxo31	NM_133765	0.00861009	0.000108124	24	13	1465.55	0.182667	0.00344478	23	11	1731.49	1	1	28.4	12.735	223.706
6987586	Eepd1	NM_026189	0.00861009	0.000108124	24	6	550.553	1	1	28.4	13.96	93.8734	1	0.128645	30	13	389.899
4970985	---	---	0.0109484	0.000153442	26	13	5343.18	1	0.712712	26	13	3463.27	1	1	28.4	13.05	1161.49
6768951	Slc19a1	NM_031196	0.0109484	0.000153442	24	12	277.822	0.606236	0.0343495	24	10.5	366.281	1	1	28.4	13.095	50.7339
6780781	3010026O09Rik	BC028428	0.0109484	0.000153442	22	5	855.741	0.606236	0.0343495	24	3	928.926	0.741167	0.00454255	30	12	422.708
6785753	Gck	NM_010292	0.0109484	0.000153442	24	16	8507.91	0.15381	0.00259733	24	13	7594.54	0.741167	0.00454255	26	25	10271.4
6800228	Arl4a	NM_001039515	0.0109484	0.000153442	24	22	949.291	0.0190961	3.60118e-05	22	2	371.585	1	1	28.4	12.855	22.4036
6804526	Akr1c19	NM_001013785	0.0109484	0.000153442	24	15	16487.2	1	1	28.4	14.695	841.188	1	1	28.4	14.96	1421.44
6805381	Hist1h1c	NM_015786	0.0109484	0.000153442	22	21	5943.44	1	1	28.4	14.275	101.454	1	0.846691	28	9	732.138
6819153	Mmp14	NM_008608	0.0109484	0.000153442	22	2	1526.93	1	0.416347	12	8	1425.74	1	0.712712	18	2	1045.25
6825192	Tnfrsf19	NM_013869	0.0109484	0.000153442	22	10	187.525	1	0.193236	26	3	135.906	1	0.0343495	28	16	74.3169
6830770	Trib1	NM_144549	0.0109484	0.000153442	22	15	1815.92	1	0.193236	24	13	2052.52	1	0.0343495	26	1	1667.57
6837815	2010001J22Rik	BC087962	0.0109484	0.000153442	24	3	573.251	1	0.128645	20	8	631.093	1	1	28.4	11.82	70.0283
6851669	Man2a1	NM_008549	0.0109484	0.000153442	24	14	18869.4	0.0128763	1.65562e-05	24	14	13762.8	1	1	28.4	14.57	4795.53
6854462	Decr2	NM_011933	0.0109484	0.000153442	24	13	30262.9	0.420845	0.0167025	26	10	15493.4	0.488427	0.00194684	28	21	27565.9
6859304	Rnf125	NM_026301	0.0109484	0.000153442	22	2	114024	0.0036759	1.26038e-06	22	2	116773	1	0.0130072	24	12	20869.8
6859411	Mapre2	NM_153058	0.0109484	0.000153442	24	16	484.085	1	0.285775	28	13	118.44	1	1	28.4	14.58	37.8316
6860259	Arhgap26	NM_175164	0.0109484	0.000153442	25	3	604.435	1	1	28.4	16.59	112.991	1	0.499811	12	2	62.0133
6873133	Pik3ap1	NM_031376	0.0109484	0.000153442	24	8	3092.89	0.0222274	5.23961e-05	24	9	2323.84	1	1	28.4	12.58	65.6793
6873960	Dclre1a	NM_018831	0.0109484	0.000153442	24	12	773.292	0.606236	0.0343495	26	16	181.161	1	1	28.4	15.345	104.302
6882894	Lpin3	NM_022883	0.0109484	0.000153442	22	8	77.7817	0.763806	0.054277	24	8.5	41.295	1	0.0167025	33	13.75	124.486
6894925	---	GENSCAN00000003979	0.0109484	0.000153442	24	7	8100.12	1	0.15798	24	0	5128.43	1	0.128645	24	18.5	1666.72
6906441	Trim2	NM_030706	0.0109484	0.000153442	26	23	1091.14	1	0.499811	26	18	336.583	1	1	28.4	11.3	195.508
6915843	Ak3l1	NM_009647	0.0109484	0.000153442	24	13	10070.4	1	1	28.4	17.12	405.355	1	0.260609	28	25	410.758
6929850	Add1	NM_001102444	0.0109484	0.000153442	26	2	2530.31	0.325243	0.0100785	22	4	926.522	1	0.285775	30	13	2039.23
6932540	Ccng2	NM_007635	0.0109484	0.000153442	24	22	1381.69	0.0434602	0.000216072	24	0	966.332	1	1	28.4	9.71	75.8531
6933141	Lrrc8d	NM_001122768	0.0109484	0.000153442	24	2	3281.61	1	0.193236	22	2	2231.49	1	0.0271394	28	12	2893.41
6935197	Gpr146	NM_001038703	0.0109484	0.000153442	26	8	3043.81	1	1	28.4	11.955	471.136	1	0.499811	32	13.25	1788.8
6939265	Clock	NM_007715	0.0109484	0.000153442	24	23	3331.96	1	1	28.4	11.525	212.033	1	1	28.4	12.835	573.81
6941049	Ulk1	NM_009469	0.0109484	0.000153442	22	9	3149.52	0.0845496	0.00078998	24	4	747.27	1	0.846691	32	11	1325.26
6959133	Ethe1	NM_023154	0.0109484	0.000153442	24	1	11862.8	1	0.597883	16	7	1881.4	1	1	28.4	10.42	1117.53
6966600	Ccne1	NM_007633	0.0109484	0.000153442	22	13	135.128	1	1	28.4	16.585	6.05602	1	1	28.4	17.13	5.88666
6971017	Gga2	NM_028758	0.0109484	0.000153442	25	21	520.289	0.679025	0.0432758	24.6667	17.3333	420.776	1	0.128645	30	4	434.376
6972491	Ccnd1	NM_007631	0.0109484	0.000153442	24	10	16898.3	1	0.416347	22	11	5859.65	1	0.712712	24	20	3963.62
6995402	Nnmt	NM_010924	0.0109484	0.000153442	22	17	8857.5	1	0.597883	23	15.5	4405.13	1	0.193236	28	5	7331.57
7009782	Wdr45	NM_172372	0.0109484	0.000153442	22	9	4466.44	0.0510579	0.000301988	24	6	5490.54	0.445283	0.00145043	30	16	4911.42
4629309	---	---	0.0137367	0.000216072	24	23	5665.13	1	1	28.4	14.485	1267.71	1	0.416347	38	33	3890.57
5145046	---	---	0.0137367	0.000216072	22	15	31764.4	1	0.116489	22	15	14178.6	1	0.597883	32	24.5	16460.6
6755540	5830417C01Rik	NM_024282	0.0137367	0.000216072	24	21	909.127	1	1	28.4	15.605	42.7142	1	1	28.4	14.565	72.9462
6763537	Prdx6	NM_007453	0.0137367	0.000216072	22	14	28898.2	1	1	28.4	14.86	1028.29	1	1	28.4	9.475	5229.78
6768143	Cbara1	NM_144822	0.0137367	0.000216072	24	5	721.249	1	1	28.4	13.205	225.667	1	1	28.4	10.065	217.459
6768237	Aifm2	NM_001039194	0.0137367	0.000216072	26	13	431.052	0.679025	0.0432758	24	15	562.008	1	1	28.4	14.005	97.9576
6775887	Slc17a8	NM_182959	0.0137367	0.000216072	28	19.5	277.645	1	0.712712	24	22	99.3485	1	0.193236	38	22	78.0646
6776872	Syt1	NM_009306	0.0137367	0.000216072	24	9	1672.38	0.00172836	2.96307e-07	24	6	1440.73	0.135651	7.55815e-05	30	16	2591.48
6781885	Gas7	NM_001109657	0.0137367	0.000216072	24	3	149.836	0.839358	0.067776	22	4	406.94	1	0.0842688	30	11	437.416
6789743	Serpinf2	NM_008878	0.0137367	0.000216072	22	7	61775.7	0.0630733	0.000419011	24	5	64829.6	1	0.193236	26	17	16922.6
6791543	Hdac5	NM_001077696	0.0137367	0.000216072	24	0	554.018	1	0.345572	22	3	1726.61	1	1	28.4	10.395	287.691
6833382	Krt18	NM_010664	0.0137367	0.000216072	24	3	7206.97	1	1	28.4	13.105	2614.47	1	1	28.4	10.59	4493.14
6836366	St3gal1	NM_009177	0.0137367	0.000216072	22	2	5569.24	1	0.345572	24	17.5	133.219	1	0.067776	30	6	6262.7
6838809	Itga5	NM_010577	0.0137367	0.000216072	24	22	722.168	1	1	28.4	11.865	144.002	1	0.285775	27	2.5	933.841
6850192	Flot1	NM_008027	0.0137367	0.000216072	26	9	775.696	1	0.15798	27.3333	5	977.882	0.842323	0.00595676	24	20	511.38
6852836	Epas1	NM_010137	0.0137367	0.000216072	24	12	10432.4	1	0.712712	24	12	257.599	1	1	28.4	13.365	3303.4
6854844	Snf1lk	NM_010831	0.0137367	0.000216072	24	16	1178.18	1	0.597883	27	13	783.085	0.842323	0.00595676	32	2	689.571
6855659	Vegfa	NM_001025250	0.0137367	0.000216072	24	12.5	3146.34	1	1	28.4	16.04	289.765	1	1	28.4	15.34	906.863
6857183	Xdh	NM_011723	0.0137367	0.000216072	24	14	4483.2	1	0.416347	22	14	1749.95	1	1	28.4	10.97	2969.44
6869021	Rcl1	NM_021525	0.0137367	0.000216072	22	9	3384.14	0.279725	0.00776882	26	3	1939.88	1	0.285775	36	12	1633.56
6876357	D730039F16Rik	BC021771	0.0137367	0.000216072	22	1	1570.48	1	0.15798	20	4	1123.45	1	0.846691	12	1	483.802
6883329	Cebpb	NM_009883	0.0137367	0.000216072	22	15	1532.23	1	1	28.4	12.1	398.653	1	1	28.4	11.775	63.7506
6888720	Ptpmt1	NM_025576	0.0137367	0.000216072	28	15	1969.29	1	0.235442	24	11	3488.51	1	1	28.4	13.13	235.849
6890926	RP23-100C5.8	NM_197945	0.0137367	0.000216072	24	6	199.404	1	1	28.4	15.3	77.7298	1	1	28.4	9.565	106.774
6892308	Pxmp4	NM_021534	0.0137367	0.000216072	24	22.5	9219.89	1	1	28.4	12.44	230.213	1	0.128645	32	1	7177.13
6899574	Lingo4	NM_177250	0.0137367	0.000216072	24	16.5	313.779	1	1	28.4	16.22	31.5423	1	1	28.4	13.52	23.7429
6907869	Mov10	NM_008619	0.0137367	0.000216072	22	8	1530.39	0.00559603	4.79687e-06	26	4	1606.26	1	0.054277	30	14	1404.24
6919396	Cyp7a1	NM_007824	0.0137367	0.000216072	24	14.5	89372.9	1	0.416347	36.6667	17	36887.3	0.280617	0.000577302	32	19	63322.1
6923059	Adfp	NM_007408	0.0137367	0.000216072	22	4	50493.7	1	0.416347	20	5	28658.9	1	1	28.4	12	5653.99
6934164	P2rx4	NM_011026	0.0137367	0.000216072	23	10.5	5720.78	0.0630733	0.000419011	28	4	6586.06	1	0.0100785	26	18	3262.24
6941866	Pitpnm2	NM_011256	0.0137367	0.000216072	24	11	837.285	1	1	28.4	12.495	82.9747	1	0.846691	24	23	276.832
6948913	Bhlhb2	NM_011498	0.0137367	0.000216072	22	15	3808.9	0.946178	0.0842688	22	13	3855.15	1	0.0432758	24	4.5	952.579
6953128	Epha1	NM_023580	0.0137367	0.000216072	22	12	1572.04	1	1	28.4	11.855	225.875	1	1	28.4	10.48	55.8837
6959457	Hnrnpl	NM_177301	0.0137367	0.000216072	24	7	3702.69	0.11916	0.00145043	24	2	3298.58	1	0.712712	30	12.5	2657.77
6967060	Saa4	NM_011316	0.0137367	0.000216072	20	16	21021.6	0.24129	0.00595676	22	13	21898.4	1	1	28.4	11.46	5069.44
6967862	Klf13	NM_021366	0.0137367	0.000216072	24	12	892.227	0.13439	0.00194684	26	12	875.327	1	0.712712	28	24	117.875
6975367	Ppp1r3b	NM_177741	0.0137367	0.000216072	24	18.5	83510.9	0.0510579	0.000301988	24	14	28021.8	1	0.128645	31	26.5	30737.6
6978923	Cdh1	NM_009864	0.0137367	0.000216072	24	1	2370.65	1	1	28.4	10.055	898.863	1	1	28.4	10.405	319.76
6983879	Calr	NM_007591	0.0137367	0.000216072	24	3	44547.2	0.606236	0.0343495	24	18	21817.4	0.627918	0.00344478	28	4.5	44379.3
6998645	Gnat1	NM_008140	0.0137367	0.000216072	24	9.5	150.967	1	0.597883	12	0	139.512	1	1	28.4	11.21	41.1289
6844291	Med15	NM_033609	0.0164231	0.00025903	24	4.5	455.059	1	1	28.4	9.55	167.98	1	0.235442	34	5	388.838
5132309	---	---	0.0179287	0.000301988	24	15	1309.92	1	1	28.4	13.195	256.58	1	1	28.4	11.065	670.21
6760642	Col6a3	AF064749	0.0179287	0.000301988	26	2	72.337	1	1	28.4	11.385	1.47043	1	1	28.4	10.83	19.3885
6768126	Pla2g12b	NM_023530	0.0179287	0.000301988	22	4	3670.38	1	0.345572	34	17.5	2188.14	1	1	28.4	11.47	88.441
6777583	Rassf3	NM_138956	0.0179287	0.000301988	24	8	1933.58	1	1	28.4	12.68	484.987	1	1	28.4	12.565	383.377
6790531	Ypel2	NM_001005341	0.0179287	0.000301988	24	22.5	4428.47	0.0222274	5.23961e-05	22	2	5603.47	1	0.15798	28	8.5	3282.39
6795904	Dact1	NM_021532	0.0179287	0.000301988	26	11	415.213	1	0.285775	28	10	143.26	1	1	28.4	16.6	38.2085
6800934	Nfkbia	NM_010907	0.0179287	0.000301988	22	12	1609.3	1	1	28.4	10.97	432.143	1	1	28.4	11.98	265.245
6805397	Slc17a3	NM_134069	0.0179287	0.000301988	24	21	20522.8	0.0376854	0.000153442	26	16	13606.2	0.488427	0.00194684	26	5	7931.33
6805797	Agtr1a	NM_177322	0.0179287	0.000301988	22	6	16661.1	0.0376854	0.000153442	24	4	8937.9	0.244409	0.000419011	28	14	9105.98
6810688	Net1	NM_019671	0.0179287	0.000301988	24	22.5	1910.67	0.36786	0.0130072	24	23	968.312	1	1	28.4	9.055	255.744
6825638	Slc25a37	NM_026331	0.0179287	0.000301988	22	14	469.802	0.540748	0.0271394	14	9	756.18	1	0.846691	30	25	744.583
6836806	Plec1	BC024074	0.0179287	0.000301988	24	7	490.449	1	1	28.4	12.115	113.152	1	1	28.4	10.915	77.1033
6863434	Npc1	NM_008720	0.0179287	0.000301988	24	9	5623.55	1	0.104334	24	5	2355.44	0.842323	0.00595676	28	15	6589.46
6872051	Gda	NM_010266	0.0179287	0.000301988	22	17	4050.24	0.839358	0.067776	24	16	969.373	1	1	28.4	15.2	175.558
6876210	St6galnac6	NM_016973	0.0179287	0.000301988	22	1	1871.85	1	1	28.4	13.265	0	1	1	28.4	11.12	541.064
6877909	Dhrs9	NM_175512	0.0179287	0.000301988	22	2	533.159	0.606236	0.0343495	24	22	132.936	1	0.0100785	33	4	625.295
6887522	Abcb11	NM_021022	0.0179287	0.000301988	24	2	66231.3	0.0510579	0.000301988	21	4.5	19542.4	1	0.0271394	28	10	20971.7
6943126	Lnx2	NM_080795	0.0179287	0.000301988	26	23	1220.25	1	1	28.4	11.005	92.1038	1	1	28.4	12.37	495.473
6950160	Gabarapl1	NM_020590	0.0179287	0.000301988	22	7	19536.9	0.0376854	0.000153442	24	4	16773.2	1	0.0130072	27	16.5	11043
6957346	Fkbp4	NM_010219	0.0179287	0.000301988	24	19	15968.2	0.0128763	1.65562e-05	24	16	14256.5	0.111137	5.23961e-05	26	4	24457.5
6958256	Bhlhb3	NM_024469	0.0179287	0.000301988	24	10	44.0528	1	1	28.4	13.805	2.17966	1	1	28.4	15.055	0.586192
6959221	Atp5sl	NM_025504	0.0179287	0.000301988	24	11	1385.72	1	1	28.4	12.84	401.007	1	1	28.4	10.72	221.562
6977861	Lonp2	NM_025827	0.0179287	0.000301988	24	5	18355.3	1	0.128645	20	6	4072.16	1	0.0100785	30	13	10356.5
6981621	Leprotl1	NM_026609	0.0179287	0.000301988	24	1	2335.5	1	1	28.4	12.015	365.475	1	1	28.4	11.19	431.937
6992306	Gmppb	NM_177910	0.0179287	0.000301988	12	2	1154.21	0.028443	7.55815e-05	24	13	1444.55	1	1	28.4	15.135	396.099
4839113	---	---	0.0212941	0.000360499	16	14	21.7082	1	1	28.4	12.16	7.96591	1	1	28.4	13.16	0.958483
6748877	Map4k4	NM_008696	0.0212941	0.000360499	22	2	281.004	0.540748	0.0271394	20	4	183.777	1	0.0943014	35	2.5	110.91
6754681	Sell	NM_011346	0.0223205	0.000419011	24	5	71.5592	0.932083	0.0760224	23	2.5	97.3686	1	0.345572	24	17	133.219
6759718	Tns1	BC055076	0.0223205	0.000419011	22	15	2770.44	0.0128763	1.65562e-05	24	12	1656.96	1	0.128645	24	3.5	1469.37
6763626	Fmo2	NM_018881	0.0223205	0.000419011	26	13	5238.95	1	1	28.4	11.525	554.619	1	0.846691	26	25	2161.34
6775355	Gamt	NM_010255	0.0223205	0.000419011	26	14	14776.3	0.325243	0.0100785	24	11	17142.5	1	0.054277	24	23	0
6779162	Spred2	NM_033523	0.0223205	0.000419011	24	6	395.768	1	0.846691	16	7	66.6095	1	0.067776	36	4	396.263
6784042	Thra	NM_178060	0.0223205	0.000419011	26	3	576.716	0.211129	0.00454255	18	5	684.197	1	1	28.4	10.135	200.11
6785538	Narf	NM_026272	0.0223205	0.000419011	24	11	1093.33	1	0.416347	24	11	1303.76	1	1	28.4	14.43	130.21
6787614	Adra1b	NM_007416	0.0223205	0.000419011	26	23	3381.6	1	0.416347	18	3	576.009	1	1	28.4	11.04	1479.54
6792455	Mif4gd	NM_027162	0.0223205	0.000419011	24	22	771.453	1	1	28.4	17.83	128.114	1	1	28.4	13.36	381.14
6798313	Crip2	NM_024223	0.0223205	0.000419011	24	0	5232.94	1	0.285775	18	9	3021.33	1	1	28.4	13.915	588.367
6803219	Serpina6	NM_007618	0.0223205	0.000419011	24	14	40443.2	1	0.416347	26	8	63040.4	1	1	28.4	11.36	2739.23
6822167	Mbnl2	NM_175341	0.0223205	0.000419011	22	14	2479.68	1	0.499811	24	13	2146.85	1	1	28.4	15.78	486.541
6838257	Slc38a2	NM_175121	0.0223205	0.000419011	22	12	11439	0.13439	0.00194684	22	11	6885.81	1	0.235442	26	24	9462.57
6840491	Bdh1	NM_175177	0.0223205	0.000419011	22	9	13913.7	1	0.193236	20	9	8225.91	1	0.054277	32	15	7172.82
6843923	Litaf	NM_019980	0.0223205	0.000419011	26	24	10183.8	1	0.193236	20	3	0	1	0.0432758	32	4	4669.31
6849698	Zfand3	NM_148926	0.0223205	0.000419011	22	8	1627.12	1	1	28.4	11.925	160.114	1	1	28.4	10.215	440.116
6849779	Pde9a	NM_008804	0.0223205	0.000419011	24	23	1121.97	1	0.15798	20	6	482.388	1	1	28.4	9.945	134.68
6850537	Cyp39a1	NM_018887	0.0223205	0.000419011	24	18	3934.06	1	1	28.4	15.725	794.66	1	1	28.4	14.625	576.593
6860256	Ndfip1	NM_022996	0.0223205	0.000419011	24	12.5	11072.6	1	0.597883	22	9	7152.6	1	0.143312	33	15.75	12613.6
6872584	Gldc	NM_138595	0.0223205	0.000419011	24	23	13544.1	1	1	28.4	12.02	1210.9	1	0.067776	28	6	10062.4
6875901	Rxra	NM_011305	0.0223205	0.000419011	24	10	6785.26	1	1	28.4	12.815	346.543	1	1	28.4	9.25	2228.97
6885489	Agpat2	NM_026212	0.0223205	0.000419011	24	21	39683.5	0.606236	0.0343495	27	14.5	28502.7	1	1	28.4	13.7	7567.87
6885868	Uck1	NM_011675	0.0223205	0.000419011	24	20.5	1999.1	1	1	28.4	16.725	945.068	1	1	28.4	11.77	397.224
6890440	Shf	NM_001013829	0.0223205	0.000419011	24	7	274.499	1	0.104334	26	4	133.855	1	0.285775	20	19	0
6897441	Foxo1	NM_019739	0.0223205	0.000419011	24	13	2596.85	1	0.193236	22	12	1148.77	1	0.285775	30	27.5	750.523
6902213	Uox	NM_009474	0.0223205	0.000419011	22	12	38456.6	1	1	28.4	16.505	14471.6	1	0.499811	37.3333	12.6667	45521.2
6913560	Slc44a1	NM_133891	0.0223205	0.000419011	26	24	2935.91	1	0.128645	18	5	3280.69	1	1	28.4	9.62	786.436
6919944	Ripk2	NM_138952	0.0223205	0.000419011	22	11	675.216	1	0.285775	24	13	261.771	1	1	28.4	14.75	73.9026
6926041	Tmem50a	NM_027935	0.0223205	0.000419011	24	13.5	18406.6	0.420845	0.0167025	24	10	7012.31	1	0.260609	26	21	10740.5
6926928	Pex14	NM_019781	0.0223205	0.000419011	22	8	1146.64	1	1	28.4	11.18	205.382	1	1	28.4	11.105	201.895
6926936	Pgd	NM_001081274	0.0223205	0.000419011	24	21	2493.05	1	1	28.4	13.14	72.2147	1	1	28.4	10.305	834.996
6944293	Mdfic	NM_175088	0.0223205	0.000419011	24	3	795.071	0.679025	0.0432758	24	0	149.836	1	1	28.4	10.98	470.801
6947679	Gfpt1	NM_013528	0.0223205	0.000419011	12	3	1890.17	0.11916	0.00145043	24	12	2540.35	1	1	28.4	16.58	1283.81
6964635	2310007H09Rik	NM_029609	0.0223205	0.000419011	23	10	3892.69	0.946178	0.0842688	24	11	5854.84	1	1	28.4	13.53	0
6973221	Saps1	NM_172894	0.0223205	0.000419011	24	5	1360.47	1	1	28.4	16.35	239.002	1	1	28.4	9.62	909.746
6977795	Dhps	NM_001039514	0.0223205	0.000419011	24.6667	13.3333	335.192	1	0.235442	24	12	89.2369	1	1	28.4	15.155	105.368
6978314	Herpud1	NM_022331	0.0223205	0.000419011	24	12	46397.9	0.13439	0.00194684	22	11	32795.9	0.488427	0.00194684	28	22	29740.3
6978355	Gpr97	NM_173036	0.0223205	0.000419011	24	4	238.79	1	1	28.4	12.15	34.003	1	0.712712	14	10	161.008
6984572	Slc38a7	NM_172758	0.0223205	0.000419011	24	7	861.68	0.36786	0.0130072	38	36	961.877	1	1	28.4	13.98	142.42
6991192	Nt5e	NM_011851	0.0223205	0.000419011	22	1	4945.08	1	1	28.4	12.535	0	1	1	28.4	15.875	257.937
6998907	Rtp3	ENSMUST00000084922	0.0223205	0.000419011	22	21	8161.71	1	0.846691	26	18	2690.26	0.445283	0.00145043	28	5	3229.36
7011907	Nsdhl	NM_010941	0.0223205	0.000419011	22	11	18250.2	1	1	28.4	16.77	3280.36	1	1	28.4	15.04	4130.97
7019867	Acsl4	NM_207625	0.0223205	0.000419011	24	16	7008.7	1	0.285775	30	13	2897.65	1	1	28.4	12.795	984.567
4320454	---	---	0.0281791	0.000577302	26	23	1728.1	1	0.416347	20	5	3699.51	1	1	28.4	9.84	633.51
6754014	Ivns1abp	NM_054102	0.0281791	0.000577302	24	14.5	16927.2	0.0630733	0.000419011	24	13	8083.15	1	1	28.4	17.17	4399.22
6756473	Irf6	NM_016851	0.0281791	0.000577302	26	25	2963.27	0.15381	0.00259733	22	2	2903.38	1	0.712712	26	8	1398.59
6759782	Tuba4a	NM_009447	0.0281791	0.000577302	26	25	10295.5	0.763806	0.054277	24	17	7106	0.56112	0.00259733	32	2	11409.7
6763706	Atp1b1	NM_009721	0.0281791	0.000577302	20	14	2383.37	1	0.499811	24	10.5	1636.7	1	0.345572	12	1	1366.55
6764721	Capn2	NM_009794	0.0281791	0.000577302	24	2	1348.45	1	1	28.4	12.98	61.3861	1	1	28.4	10.055	240.831
6769448	Rfx4	NM_001024918	0.0281791	0.000577302	24	2	316.43	0.15381	0.00259733	22	3	625.295	0.627918	0.00344478	30	11	383.181
6769878	Hal	NM_010401	0.0281791	0.000577302	24	3	61664.5	1	0.846691	28	3	24915.3	1	0.0842688	27	13	16009.3
6775319	Med16	NM_198107	0.0281791	0.000577302	25	8.5	293.909	1	1	28.4	13.99	110.707	1	0.499811	24	20	113.561
6787100	Rhbdf1	NM_010117	0.0281791	0.000577302	22	10	161.645	0.36786	0.0130072	26	5	127.138	1	0.067776	24	19	67.3166
6788312	Slc22a4	NM_019687	0.0281791	0.000577302	24	9	205.98	0.420845	0.0167025	22	10	284.752	1	1	28.4	12.55	82.3854
6788741	Tom1l2	NM_153080	0.0281791	0.000577302	26	8	450.993	1	0.104334	27	7	235.396	1	1	28.4	9.51	100.668
6792601	Tk1	NM_009387	0.0281791	0.000577302	24	16	292.813	1	1	28.4	13.07	92.7091	1	1	28.4	10.995	136.245
6792794	Notum	NM_175263	0.0281791	0.000577302	22	10	958.342	1	0.235442	28	6	1107.4	1	0.499811	36	14	630.174
6793961	Cmpk2	NM_020557	0.0281791	0.000577302	24	2	324.421	1	0.712712	18	7	14.0007	1	1	28.4	12.99	16.3663
6796704	Flvcr2	NM_145447	0.0281791	0.000577302	22	6	191.131	1	0.712712	24	4.5	180.63	1	0.597883	22	20	25.8801
6824321	Gch1	NM_008102	0.0281791	0.000577302	22	10	11278.6	0.182667	0.00344478	24	5	6093.92	1	0.0100785	33	14	6622.16
6824763	Slc7a8	NM_016972	0.0281791	0.000577302	24	4	344.856	1	1	28.4	11.745	0	1	1	28.4	10.77	38.3079
6831613	Mapk15	NM_177922	0.0281791	0.000577302	24	1	293.025	0.182667	0.00344478	23	1.5	173.453	1	0.067776	28	8	142.058
6869561	Tmem20	NM_175507	0.0281791	0.000577302	24	13	3949.69	0.679025	0.0432758	22	13	1108.11	0.155657	0.000153442	30	25	2318.89
6870931	Lrp5	NM_008513	0.0281791	0.000577302	24	2	2494.74	1	0.193236	16	4	978.636	1	1	28.4	9.835	608.925
6875727	Fbxw5	NM_013908	0.0281791	0.000577302	22	8	274.428	1	1	28.4	13.7	80.8152	1	1	28.4	11.4	118.963
6876173	5830434P21Rik	BC055116	0.0281791	0.000577302	22	9	1285.87	1	1	28.4	9.73	226.852	1	1	28.4	9.775	256.56
6897691	Tm4sf4	NM_145539	0.0281791	0.000577302	22	6	13440	1	1	28.4	14.005	3161.06	1	1	28.4	13.065	1784.52
6899679	Arnt	NM_001037737	0.0281791	0.000577302	22	18	2433.72	0.36786	0.0130072	22	20	429.709	1	1	28.4	12.3	737.273
6906834	Zbtb7b	NM_009565	0.0281791	0.000577302	26	2	974.464	1	0.597883	30	9	331.562	1	0.416347	30	4	978.212
6910668	St6galnac3	NM_011372	0.0281791	0.000577302	22	6	57.8413	1	1	28.4	12.82	3.04798	1	1	28.4	10.77	9.83161
6911719	E130016E03Rik	NM_001039556	0.0281791	0.000577302	26	19	10.748	1	1	28.4	11.575	5.9998	1	1	28.4	11.66	0.823072
6921074	Oprs1	NM_011014	0.0281791	0.000577302	26	25	21459.3	0.182667	0.00344478	18	6	17119.7	1	1	28.4	10.655	4588.42
6921929	Epb4.1l4b	NM_019427	0.0281791	0.000577302	22	11	6391.11	1	0.597883	26	10.5	3215.85	1	1	28.4	11.53	678.784
6932951	Arhgap24	NM_029270	0.0281791	0.000577302	26	23	602.95	0.839358	0.067776	24	22.5	167.301	1	0.128645	34	5	354.048
6940841	Tgfbr3	NM_011578	0.0281791	0.000577302	22	11	608.607	0.474693	0.021342	26	6	430.699	1	0.285775	34	14	271.317
6942956	2210010N04Rik	BC025567	0.0281791	0.000577302	24	2	110.097	1	0.285775	16	6	37.0524	1	1	28.4	11.1	34.9318
6945090	2410127E18Rik	BC060132	0.0281791	0.000577302	22	15	885.51	0.679025	0.0432758	26	12	172.746	1	1	28.4	14.81	13.0168
6947596	Tgfa	NM_031199	0.0281791	0.000577302	24	8	1069.92	1	0.128645	22	8	863.66	1	1	28.4	11.295	57.3039
6962444	Fzd4	NM_008055	0.0281791	0.000577302	24	14	3305.72	1	1	28.4	11.665	201.752	1	1	28.4	15.645	89.1432
6968828	Cpeb1	NM_007755	0.0281791	0.000577302	24	9	89.1662	1	1	28.4	15.125	16.9087	1	1	28.4	10.13	9.88924
6978823	Elmo3	NM_172760	0.0281791	0.000577302	22	9	799.101	0.36786	0.0130072	28	5	701.803	0.741167	0.00454255	28	17	243.952
6979701	Tcf25	NM_025804	0.0281791	0.000577302	24	12	5169.59	0.325243	0.0100785	26	10	4346.87	1	1	28.4	13.975	1511.96
7018664	Slc16a2	NM_009197	0.0281791	0.000577302	22	9	4761.09	1	1	28.4	11.495	1947.41	1	1	28.4	12.915	2050.52
6970840	Tmc7	NM_172476	0.0333	0.000683641	24	13	469.66	0.474693	0.021342	24	13	59.9627	1	0.712712	26.6667	25	139.135
4312050	---	---	0.0359295	0.00078998	26	12	640.992	0.540748	0.0271394	24	12.5	229.35	1	0.846691	22	3	276.974
5003258	---	---	0.0359295	0.00078998	24	13	8262.26	1	1	28.4	12.865	1540.49	1	1	28.4	16.035	2067.72
6763591	5630401D24Rik	BC014872	0.0359295	0.00078998	26	10	165.18	0.0845496	0.00078998	26	11	204.92	1	1	28.4	11.12	41.207
6765327	G0s2	NM_008059	0.0359295	0.00078998	24	21	5977.03	1	1	28.4	16.205	2409.99	1	0.235442	32	29	4623.63
6771558	Dctn2	NM_027151	0.0359295	0.00078998	22	10	1628.4	1	0.128645	24	7.5	2109.09	1	0.499811	24	21	1074.31
6784765	Axin2	NM_015732	0.0359295	0.00078998	26	2	122.471	1	0.285775	26	0	104.298	1	0.499811	36	4	106.773
6792113	Abca8b	NM_013851	0.0359295	0.00078998	24	4	5028.38	0.325243	0.0100785	24	2	2139	1	1	28.4	10.955	596.856
6802433	0610007P14Rik	BC004591	0.0359295	0.00078998	22	11	12414	1	0.416347	26	2	17583.2	0.280617	0.000577302	24	19	11156.1
6814150	Pols	NM_198600	0.0359295	0.00078998	24	13.5	721.107	0.211129	0.00454255	24	13	850.72	1	1	28.4	14.525	52.3478
6825436	Esco2	NM_028039	0.0359295	0.00078998	26	23	32.8805	1	1	28.4	16.53	3.12647	1	1	28.4	11.755	2.74994
6837827	Arsa	NM_009713	0.0359295	0.00078998	22	9	1278.24	0.839358	0.067776	38	35.75	749.728	1	1	28.4	11.485	247.116
6838999	1200013P24Rik	NM_029090	0.0359295	0.00078998	22	15	8088.45	1	0.416347	26	13	1570.98	1	1	28.4	16.35	1098.88
6849342	Clcn7	NM_011930	0.0359295	0.00078998	26	8	1255.96	0.36786	0.0130072	24	11	763.18	1	1	28.4	12.675	288.554
6850060	Agpat1	NM_018862	0.0359295	0.00078998	22	15	579.969	0.0190961	3.60118e-05	26	12	523.047	1	1	28.4	13.705	49.4579
6872250	Tjp2	NM_011597	0.0359295	0.00078998	24	0.5	1430.76	1	0.416347	22	2	521.633	1	0.345572	30	8	1089.09
6878713	Slc43a3	NM_021398	0.0359295	0.00078998	26	14	1447.31	0.679025	0.0432758	24	11	1452.4	1	0.597883	24	0.5	864.367
6887367	A230059G12Rik	AK054148	0.0359295	0.00078998	16	8	16.9706	1	1	28.4	14.975	0.250669	1	1	28.4	16.315	1.0451
6892806	D930001I22Rik	NM_173397	0.0359295	0.00078998	26	14	3728.22	1	0.285775	24	12.5	365.645	1	1	28.4	15.04	564.667
6893186	Ube2v1	NM_023230	0.0359295	0.00078998	26	14	1652.23	1	0.345572	26	13	3732.32	1	0.0271394	24	5	4012.05
6898772	Fga	NM_010196	0.0359295	0.00078998	26	2	86927.8	1	1	28.4	12.355	19784.9	1	1	28.4	11.85	9717.56
6933341	Fgfrl1	NM_054071	0.0359295	0.00078998	22	11	832.901	0.211129	0.00454255	24	6	577.777	0.445283	0.00145043	24	19	655.983
6935150	BC004044	NM_030565	0.0359295	0.00078998	22	12.5	770.11	1	1	28.4	12.04	105.688	1	0.597883	30	5	905.238
6947985	Hdac11	NM_144919	0.0359295	0.00078998	22	8	1517.03	1	1	28.4	12.365	133.7	1	1	28.4	11.565	199.739
6959274	Cyp2g1	NM_013809	0.0359295	0.00078998	20	12	15.8392	0.763806	0.054277	24	6	32.0319	1	1	28.4	14.265	10.2753
6962065	Whdc1	NM_001004185	0.0359295	0.00078998	24	9	139.371	1	1	28.4	11.885	94.8294	1	1	28.4	10.05	153.981
6963049	Rrm1	NM_009103	0.0359295	0.00078998	24	22	338.068	1	1	28.4	11.175	35.297	1	0.128645	12	1	202.657
6963881	Acsm5	NM_178758	0.0359295	0.00078998	22	10	9129.95	0.182667	0.00344478	22	7	3829.34	0.627918	0.00344478	25	20.5	2455.61
6970916	Dcun1d3	NM_173408	0.0359295	0.00078998	26	14	473.408	0.211129	0.00454255	22	13	786.161	1	1	28.4	15.105	102.299
6974582	Defb1	NM_007843	0.0359295	0.00078998	22	5	80.3273	0.36786	0.0130072	20	7	134.845	1	1	28.4	11.98	15.16
6983226	Mast3	BC024265	0.0359295	0.00078998	24	12	264.529	0.839358	0.067776	22	11	95.1766	1	1	28.4	9.975	44.9925
6984484	Ciapin1	NM_134141	0.0359295	0.00078998	24	13	309.501	1	1	28.4	15.165	175.382	1	0.712712	22	0	611.506
6987342	A230050P20Rik	NM_175687	0.0359295	0.00078998	24	0	3071.18	1	1	28.4	16.545	235.859	1	0.0271394	34	2.5	1464.35
6990664	Gclc	NM_010295	0.0359295	0.00078998	26	0	36805.8	0.763806	0.054277	22	4	26009.9	1	1	28.4	12.71	3520.5
7013015	Chic1	NM_009767	0.0359295	0.00078998	22	2	865.428	1	1	28.4	13.345	83.4457	1	1	28.4	12.77	0
6780707	Olfr56	NM_010999	0.0422208	0.000931927	22	4	2.47487	1	0.260609	24	1	3.39411	1	1	28.4	11.27	0.756958
6993739	Tyk2	NM_018793	0.0422208	0.000931927	22	8	113.844	1	0.285775	26	4	178.262	1	1	28.4	11.57	95.312
4316355	---	---	0.0434993	0.00107387	22	16	9259.63	0.24129	0.00595676	26	13	2110.5	1	1	28.4	16.45	976.351
4733707	---	---	0.0434993	0.00107387	22	7	61.5183	1	1	28.4	10.995	8.27633	1	1	28.4	11.325	18.692
4942963	---	---	0.0434993	0.00107387	24	15	9504.29	1	1	28.4	12.31	1435.8	1	1	28.4	11.15	1090.72
5058247	---	---	0.0434993	0.00107387	24	20	250.033	1	1	28.4	17.355	106.437	1	0.067776	18	6	269.549
6757994	Rev1	NM_019570	0.0434993	0.00107387	24	13.5	980.757	1	0.116489	24	12	199.051	1	1	28.4	12.99	100.459
6763623	Fmo1	NM_010231	0.0434993	0.00107387	24	19	31639.1	1	1	28.4	12.56	0	1	1	28.4	16.85	5935.81
6763631	Fmo3	NM_008030	0.0434993	0.00107387	24	17	61066.4	0.279725	0.00776882	30	23	10937	1	1	28.4	13.235	2284.96
6765474	Cnksr3	NM_172546	0.0434993	0.00107387	22	4	257.245	1	0.416347	22	3	305.329	1	0.285775	20	18	139.159
6767463	Ostm1	NM_172416	0.0434993	0.00107387	24	13	462.448	1	0.779701	24	11	277.539	1	1	28.4	13.73	55.358
6773545	Foxo3a	NM_019740	0.0434993	0.00107387	22	13	2385.28	1	1	28.4	13.18	525.221	1	1	28.4	13.31	123.492
6774264	Ddit4	NM_029083	0.0434993	0.00107387	22	20	592.909	1	1	28.4	13.255	59.1986	1	1	28.4	11.185	62.4566
6775373	Tcfe2a	NM_011548	0.0434993	0.00107387	22	9	291.823	1	1	28.4	14.925	44.1051	1	0.15798	40	0	115.329
6781487	Map2k3	NM_008928	0.0434993	0.00107387	25	13.5	1087.78	1	0.128645	40	12	1107.68	1	1	28.4	10.375	374.781
6788014	Sqstm1	NM_011018	0.0434993	0.00107387	24	3	20332.4	0.763806	0.054277	24	1.5	15572	1	1	28.4	15.405	0
6789964	Slc13a2	NM_022411	0.0434993	0.00107387	28	22	164.897	1	1	28.4	13.71	30.4682	0.627918	0.00344478	27.3333	5.66667	217.624
6792107	BC029169	BC029169	0.0434993	0.00107387	23	4.5	1240.76	1	1	28.4	8.915	212.901	1	0.0271394	35	4	858.145
6792310	Cdc42ep4	NM_020006	0.0434993	0.00107387	24	11	309.501	1	1	28.4	12.46	9.37129	1	1	28.4	10.825	153.773
6812214	Tubb2a	NM_009450	0.0434993	0.00107387	22	2	7956.51	0.540748	0.0271394	26	19	1403.18	1	0.0130072	32	2	3963.4
6815599	Pik3r1	NM_001077495	0.0434993	0.00107387	24	13	3408.33	0.839358	0.067776	24	14	6181.39	1	1	28.4	16.815	1241.39
6816703	Abhd6	NM_025341	0.0434993	0.00107387	24	18	7333.97	1	0.285775	25	15	2145.96	1	1	28.4	15.74	868.028
6817053	Atxn7	NM_139227	0.0434993	0.00107387	24	12	643.538	1	0.846691	26	13	340.189	1	1	28.4	14.645	39.4099
6820381	Tsc22d1	NM_207652	0.0434993	0.00107387	24	3.5	42.3557	1	1	28.4	11.95	13.5839	1	1	28.4	15.255	4.17971
6822173	Rap2a	NM_029519	0.0434993	0.00107387	22	17	1163.9	1	0.128645	26	15	451.558	1	1	28.4	15.765	109.871
6833394	Soat2	NM_146064	0.0434993	0.00107387	24	6	909.269	0.182667	0.00344478	24	6	2613.75	0.0341771	3.10781e-06	26	18	3188.91
6839699	Top3b	NM_011624	0.0434993	0.00107387	24	23	860.125	1	1	28.4	11.62	90.2526	1	1	28.4	9.97	204.019
6844316	Prodh	NM_011172	0.0434993	0.00107387	22	17	8311.83	1	1	28.4	16.865	945.55	1	1	28.4	13.875	1650.44
6847952	Rcan1	NM_001081549	0.0434993	0.00107387	22	17	2797.67	0.15381	0.00259733	24	13	3474.65	1	0.021342	29	26.5	2396.38
6848513	Tulp4	NM_054040	0.0434993	0.00107387	24	12	1394.41	0.279725	0.00776882	24	13	392.939	1	1	28.4	15.905	271.918
6849775	Slc37a1	NM_153062	0.0434993	0.00107387	31	2	142.623	1	0.235442	31	1	125.264	1	1	28.4	11.445	19.8669
6852874	Ttc7	NM_028639	0.0434993	0.00107387	26	9	1782.26	1	1	28.4	11.24	202.593	1	1	28.4	9.155	242.89
6866693	Lipg	NM_010720	0.0434993	0.00107387	24	12.5	1857.36	0.36786	0.0130072	22	12	1712.61	1	1	28.4	13.89	154.588
6867846	Atg2a	NM_194348	0.0434993	0.00107387	22	9	1179.03	0.011737	1.1067e-05	26	5	825.476	1	1	28.4	11.32	192.599
6868049	Vwce	BC043473	0.0434993	0.00107387	26	8	465.276	0.540748	0.0271394	30	6	276.549	1	1	28.4	10.33	158.314
6869786	0610010D20Rik	BC016430	0.0434993	0.00107387	26	9	3755.8	0.0190961	3.60118e-05	26	7	9708.79	0.445283	0.00145043	24	21	4176.03
6876342	Hspa5	NM_022310	0.0434993	0.00107387	12	3	92693.7	0.0376854	0.000153442	24	13	81835.3	1	0.235442	30	27	79072.8
6887286	Cobll1	NM_177025	0.0434993	0.00107387	22	11	3146.55	1	1	28.4	13.475	298.108	1	1	28.4	11.29	319.914
6901680	Ddit4l	NM_030143	0.0434993	0.00107387	28	24	74.6705	1	1	28.4	11.49	0.947877	1	1	28.4	14.185	7.52114
6913269	Col15a1	NM_009928	0.0434993	0.00107387	26	24	517.814	1	1	28.4	16.57	103.688	1	1	28.4	13.52	40.6427
6918028	Rnf186	NM_025786	0.0434993	0.00107387	24	10	715.733	0.679025	0.0432758	18	5	577.211	1	0.0842688	22	19	601.819
6918717	Frap1	NM_020009	0.0434993	0.00107387	22	9	1874.54	0.211129	0.00454255	24	5	1026.08	1	0.0842688	34	14	1013.35
6918999	Plekhg5	NM_001004156	0.0434993	0.00107387	24	8.5	33.9411	1	0.285775	26	4	76.7918	1	1	28.4	9.865	11.3056
6919012	Acot7	NM_133348	0.0434993	0.00107387	26	15	842.942	0.946178	0.0842688	24	15	715.521	1	1	28.4	14.88	178.851
6926881	Fbxo6	NM_015797	0.0434993	0.00107387	23	4	2131.04	1	0.345572	22	6	1739.48	1	0.104334	26	15	227.406
6929849	Sh3bp2	NM_011893	0.0434993	0.00107387	26	8	335.451	0.0990341	0.00107387	28	6	416.769	1	1	28.4	12.44	185.087
6933602	Mvk	NM_023556	0.0434993	0.00107387	24	7	623.244	1	1	28.4	11.585	181.647	1	1	28.4	11.885	274.773
6941672	Trafd1	NM_172275	0.0434993	0.00107387	25	5	1213.75	1	0.712712	24	1	950.564	1	1	28.4	10.505	300.256
6942124	Stx2	NM_007941	0.0434993	0.00107387	26	21	735.108	0.763806	0.054277	26	17	205.697	0.488427	0.00194684	28	4	409.698
6947939	Slc41a3	NM_027868	0.0434993	0.00107387	24	12	210.506	0.946178	0.0842688	24	10	30.9006	1	0.285775	30	17	94.4695
6958910	Strn4	NM_133789	0.0434993	0.00107387	22	9	551.19	1	1	28.4	11.24	97.6603	1	1	28.4	10.05	270.826
6963608	Pde3b	NM_011055	0.0434993	0.00107387	25	13.5	6451.22	0.211129	0.00454255	24	15	3664.72	1	1	28.4	15.26	545.512
6968796	Crtc3	NM_173863	0.0434993	0.00107387	26	1	149.836	0.420845	0.0167025	20	3	147.644	1	1	28.4	9.655	111.072
6969838	P2ry2	NM_008773	0.0434993	0.00107387	24	12	673.166	0.15381	0.00259733	26	12	590.788	1	0.712712	24	5	402.768
6975658	Slc7a2	NM_007514	0.0434993	0.00107387	24	10	37575.7	1	0.104334	24	9	23131.9	1	0.15798	34	10.5	30268.1
6979941	1810063B05Rik	BC038634	0.0434993	0.00107387	24	16	1386.42	1	1	28.4	15.2	247.456	1	1	28.4	16.57	338.093
6985697	---	GENSCAN00000018050	0.0434993	0.00107387	22	5	7507.92	0.763806	0.054277	20	6	2946.94	0.924807	0.00776882	30	12	6075.04
6990509	Onecut1	BC023444	0.0434993	0.00107387	24	19	1009.75	0.540748	0.0271394	26	14	1071.34	1	0.128645	26	4	1174.29
6992374	Slc26a6	NM_134420	0.0434993	0.00107387	26	24	141.563	1	0.345572	26	14	54.7301	1	1	28.4	11.355	33.6996
6994942	Tbcel	NM_173038	0.0434993	0.00107387	24	7.5	2909.39	1	1	28.4	14.25	360.487	1	0.345572	12	2	292.884
6998667	Rnf123	NM_032543	0.0434993	0.00107387	26	8	701.026	1	0.712712	14	7	695.652	1	1	28.4	8.495	319.38
7015425	Hdac6	NM_010413	0.0434993	0.00107387	22	8	474.681	1	0.345572	26	3	356.276	1	0.235442	30	13	185.474
7020156	Maged2	ENSMUST00000112700	0.0434993	0.00107387	22	6	155.634	1	0.193236	28	5.5	86.1963	1	0.846691	32	15	23.7588
6780696	Trim7	NM_053166	0.0510374	0.00126215	24	18	112.854	1	1	28.4	16.295	20.0723	1	1	28.4	15.18	29.5016
4726558	---	---	0.0550269	0.00145043	24	14	2272.08	0.279725	0.00776882	22	13	2194.51	1	0.416347	32	23	2006.27
5401488	---	---	0.0550269	0.00145043	24	5.5	2192.31	1	0.846691	20	8	1564.62	0.488427	0.00194684	26	14	3412.78
6758325	Uxs1	NM_026430	0.0550269	0.00145043	26	20	1544.96	0.606236	0.0343495	24.6667	13.3333	1799.8	1	1	28.4	15.635	278.34
6765551	Syne1	NM_001079686	0.0550269	0.00145043	26	0	1574.23	0.279725	0.00776882	24	1.5	738.785	1	0.104334	26	11	672.246
6768232	Ppa1	NM_026438	0.0550269	0.00145043	22	20	14187.6	1	0.285775	24	17	1.02898e-11	1	0.0130072	30.6667	2.66667	12915.2
6785106	Gprc5c	NM_001110337	0.0550269	0.00145043	26	6	1916.12	0.679025	0.0432758	27	5.5	2529.71	1	1	28.4	10.08	595.022
6786659	Ahsa2	NM_172391	0.0550269	0.00145043	22	19	1792.66	0.0732044	0.000577302	24	15	944.483	1	0.345572	26	4	1733.26
6794202	Lamb1-1	NM_008482	0.0550269	0.00145043	24	3	55.72	1	0.345572	22	2	98.3586	1	0.15798	12	1	15.4149
6802098	Actn1	NM_134156	0.0550269	0.00145043	24	9	1077.7	1	0.416347	25	6	377.029	1	0.067776	32	14	311.056
6802485	Angel1	NM_144524	0.0550269	0.00145043	26	3	130.956	1	1	28.4	11.6	53.942	1	0.285775	26	14	132.865
6830651	2410187C16Rik	BC051524	0.0550269	0.00145043	26	3	415.072	1	1	28.4	13.565	160.54	1	0.499811	32	12	662.135
6837368	Naga	NM_008669	0.0550269	0.00145043	26	5	908.844	1	0.597883	26	6	631.588	1	0.0842688	30	16	75.0947
6838397	Arf3	NM_007478	0.0550269	0.00145043	23	8.5	4290.76	0.00559603	4.79687e-06	26	6	3017.86	1	0.846691	38.6667	12.3333	1656.94
6844310	Slc25a1	NM_153150	0.0550269	0.00145043	23.3333	13	8245.36	1	0.712712	26	7	9456.42	1	1	28.4	14.32	1553.32
6849612	BC004004	BC058575	0.0550269	0.00145043	24	3	4562.18	0.325243	0.0100785	22	2	2850.98	1	0.597883	12	1	1552.1
6870429	Mxi1	NM_001008542	0.0550269	0.00145043	30	13	234.83	1	0.345572	10	2	76.8625	1	0.846691	32	29	164.897
6870989	Ssh3	NM_198113	0.0550269	0.00145043	24	6.5	242.608	1	1	28.4	13.415	87.1283	1	1	28.4	11.365	48.9594
6872783	Lipa	NM_021460	0.0550269	0.00145043	26	23	22660.3	0.36786	0.0130072	20	6	14229.3	1	1	28.4	14.405	5464.21
6878712	Slc43a1	NM_001081349	0.0550269	0.00145043	22	17	207.112	1	0.235442	24	13	750.382	1	0.712712	14	1	64.4174
6881146	Stk35	NM_183262	0.0550269	0.00145043	22	13	1610.01	0.0990341	0.00107387	24	13	227.83	1	0.846691	28	26	56.5685
6882669	Manbal	NM_026968	0.0550269	0.00145043	22	6	355.958	1	1	28.4	14.645	22.6401	1	1	28.4	11.825	48.5874
6887053	Wdsub1	NM_028118	0.0550269	0.00145043	22	8	240.275	1	0.104334	20	6.5	219.203	1	1	28.4	10.86	42.3005
6888928	Accs	NM_183220	0.0550269	0.00145043	22	7	122.612	1	0.416347	24	6.5	84.2164	0.627918	0.00344478	32	13	127.633
6913013	Rgp1	NM_172866	0.0550269	0.00145043	22	10	1085.97	1	0.15798	22	10	873.843	1	1	28.4	11.935	115.455
6939695	Ugt2b34	NM_153598	0.0550269	0.00145043	24	16	31726	0.540748	0.0271394	27	13	27382.1	1	1	28.4	16.915	6881.65
6942455	---	AB073973	0.0550269	0.00145043	30	11	53.528	1	1	28.4	15.155	12.6972	1	1	28.4	10.07	6.58811
6943476	Rbm47	NM_178446	0.0550269	0.00145043	24	13	3354.59	1	0.285775	28	14	4202.34	1	0.846691	14	2	1093.33
6956974	Atp6v1e1	NM_007510	0.0550269	0.00145043	24	12	6258.88	1	1	28.4	12.875	1186.49	1	1	28.4	13.885	1142.11
6959250	Cyp2b10	NM_009999	0.0550269	0.00145043	24	20	17324.5	1	1	28.4	13.115	6756.45	1	1	28.4	13.605	288.199
6965980	Hnrnpul1	NM_144922	0.0550269	0.00145043	22	8	1628.04	1	1	28.4	13.63	592.517	1	0.416347	28	13	805.89
6969940	Trim21	NM_009277	0.0550269	0.00145043	22	4	231.507	1	1	28.4	12.65	0	1	1	28.4	9.19	79.6054
6974743	Fgfr1	NM_010206	0.0550269	0.00145043	24	10	131.451	1	0.712712	22	11	41.8607	1	1	28.4	9.83	20.8724
6978327	Arl2bp	NM_024191	0.0550269	0.00145043	22	9	825.052	0.24129	0.00595676	24	6	716.087	1	0.0842688	24	19	234.477
6978369	Mmp15	NM_008609	0.0550269	0.00145043	24	12	1016.4	1	1	28.4	11.845	153.759	1	1	28.4	13.925	321.477
6978818	Hsf4	NM_011939	0.0550269	0.00145043	26	11	156.836	1	1	28.4	14.55	49.9359	1	0.846691	16	0	47.164
6988592	Pvrl1	NM_021424	0.0550269	0.00145043	24	0	2003.37	1	0.846691	14	9	1061.79	1	1	28.4	10.865	254.108
6990673	Elovl5	NM_134255	0.0550269	0.00145043	24	2	62038.1	0.182667	0.00344478	22	4	52939.6	1	0.499811	26	14	27653.2
6992346	Usp19	NM_027804	0.0550269	0.00145043	24	5	605.566	1	0.499811	18	9	646.861	1	1	28.4	9.19	294.505
5039967	---	---	0.0670956	0.00194684	20	13	24.8194	1	1	28.4	10.755	15.4298	1	1	28.4	12.885	24.2584
5576438	---	---	0.0670956	0.00194684	26	13	1040.65	1	1	28.4	12.225	179.602	1	1	28.4	12.305	40.0148
6754900	Rxrg	NM_009107	0.0670956	0.00194684	26	25	179.181	1	1	28.4	16.205	38.2895	1	1	28.4	10.435	33.4628
6759664	Igfbp5	NM_010518	0.0670956	0.00194684	22	18	263.327	1	1	28.4	16.215	27.4753	1	1	28.4	8.85	51.5615
6760911	D1Ertd622e	BC023951	0.0670956	0.00194684	22	13	582.515	1	0.15798	24	11	46.0327	1	1	28.4	15.09	54.2517
6764351	Fh1	NM_010209	0.0670956	0.00194684	24	16	16194.7	1	0.416347	14	11	21101.6	1	1	28.4	15.05	3882.27
6771620	Prim1	NM_008921	0.0670956	0.00194684	24	22	112.784	1	1	28.4	10.82	26.9199	1	1	28.4	10.285	30.5435
6771985	Map3k7ip2	NM_138667	0.0670956	0.00194684	22	3	5930.72	0.0434602	0.000216072	24	1	4094.22	1	0.712712	30	8	3072.03
6774336	Sgpl1	NM_009163	0.0670956	0.00194684	22	2	7095.46	1	1	28.4	11.435	375.387	1	1	28.4	12.295	1281.41
6776875	EG368203	NM_203660	0.0670956	0.00194684	18	5	32.8805	1	1	28.4	13.14	2.97515	1	1	28.4	15.52	0
6782610	Myo18a	NM_011586	0.0670956	0.00194684	28	8	965.696	1	1	28.4	8.065	129.902	1	1	28.4	10.04	131.63
6784062	Igfbp4	NM_010517	0.0670956	0.00194684	24	13	47747.3	0.211129	0.00454255	26	12	19390.5	1	0.104334	24	4	2.05795e-11
6785399	Baiap2	NM_130862	0.0670956	0.00194684	24	21	1451.48	1	1	28.4	10.58	265.007	1	1	28.4	11.09	291.4
6788739	Srebf1	NM_011480	0.0670956	0.00194684	26	12	17430.4	1	0.128645	25	13	19255.4	1	0.193236	12	1	12433.1
6790549	Rad51c	NM_053269	0.0670956	0.00194684	22	19	150.472	0.474693	0.021342	28	13	40.1401	1	0.0271394	28	1	28.7085
6803319	Clmn	NM_053155	0.0670956	0.00194684	26	9	4797.3	1	1	28.4	11.835	799.799	1	1	28.4	11.135	697.589
6807154	Sfxn1	NM_027324	0.0670956	0.00194684	22	19	10476.9	1	1	28.4	10.835	3532.35	1	1	28.4	11.66	2602.15
6807214	Fgfr4	NM_008011	0.0670956	0.00194684	24	4	929.633	1	1	28.4	11.21	314.803	1	1	28.4	11.815	708.832
6812178	Serpinb1a	NM_025429	0.0670956	0.00194684	22	4	175.716	1	1	28.4	15.365	140.68	1	0.712712	30	9	209.94
6815305	Hmgcr	NM_008255	0.0670956	0.00194684	22	14	68822.6	1	0.846691	34	14	21765.2	1	1	28.4	13.605	1658.54
6817763	Wnt5a	NM_009524	0.0670956	0.00194684	24	0	39.0323	1	1	28.4	13.27	7.82732	1	0.712712	12	2	70.9935
6823149	Ap3m1	NM_018829	0.0670956	0.00194684	24	13	389.687	0.763806	0.054277	22	13	3209.06	1	1	28.4	16.565	433.525
6824799	Ap1g2	NM_007455	0.0670956	0.00194684	22	9	163.695	1	0.285775	24	7	93.6209	1	1	28.4	11.93	13.5379
6825688	Slc39a14	NM_144808	0.0670956	0.00194684	24	12	6844.09	0.13439	0.00194684	24	13	8358.43	1	0.235442	22	3	8301.29
6833919	Skp2	NM_145468	0.0670956	0.00194684	22	18	170.837	0.946178	0.0842688	26	12	48.154	1	1	28.4	15.15	29.492
6835149	Slc25a32	NM_172402	0.0670956	0.00194684	24	13	2293.93	0.946178	0.0842688	22	10	1411.03	1	1	28.4	13.575	496.435
6837046	Card10	NM_130859	0.0670956	0.00194684	26	7	217.86	1	1	28.4	11.77	65.5675	1	0.597883	14	3	82.6608
6838386	Adcy6	NM_007405	0.0670956	0.00194684	26	9	363.877	0.679025	0.0432758	24	5	118.44	1	1	28.4	11.285	13.8094
6843184	Ifngr2	NM_008338	0.0670956	0.00194684	22	8	4494.23	1	0.104334	22	6	2333.17	0.56112	0.00259733	32	16	2411.38
6851232	Uhrf1	NM_010931	0.0670956	0.00194684	22	19	176.635	1	1	28.4	10.9	13.9243	1	0.143312	36	24	26.6579
6855737	Ubr2	NM_146078	0.0670956	0.00194684	24	14	745.291	1	0.712712	27	13.5	1102.17	1	1	28.4	15.115	398.247
6857501	Arl6ip2	NM_178050	0.0670956	0.00194684	24	16	11235.1	0.474693	0.021342	24	12.5	9194.23	1	1	28.4	16.21	748.886
6867593	1810055G02Rik	BC019471	0.0670956	0.00194684	24	12.5	1718.06	0.00559603	4.79687e-06	22	10	1808.57	1	0.104334	26	21	908.137
6867854	Sf1	NM_001110791	0.0670956	0.00194684	26	5	1764.44	1	1	28.4	11	169.194	1	1	28.4	11.38	601.094
6878038	Rapgef4	NM_019688	0.0670956	0.00194684	24	12	8444.69	1	1	28.4	11.785	1287.73	1	1	28.4	15.69	1655.58
6882880	Plcg1	NM_021280	0.0670956	0.00194684	26	9	869.953	1	0.15798	23	6.5	381.343	1	1	28.4	12.11	196.504
6884709	Pfkfb3	NM_133232	0.0670956	0.00194684	24	12	1373.91	0.0350383	0.000108124	24	12	955.867	1	0.15798	28	25	157.756
6892699	Mafb	NM_010658	0.0670956	0.00194684	26	11	929.987	0.24129	0.00595676	24	12	1107.47	1	0.067776	22	4	149.412
6894274	BC006779	NM_183162	0.0670956	0.00194684	26	24	3820.71	1	1	28.4	11.17	113.317	1	1	28.4	11.8	995.456
6899252	Pmvk	NM_026784	0.0670956	0.00194684	30	20	4789.45	1	0.345572	21	10.5	2549.65	1	1	28.4	13	1367.4
6901634	Slc39a8	NM_026228	0.0670956	0.00194684	24	1	2525.22	1	1	28.4	13.915	299.178	1	1	28.4	10.775	155.031
6911089	Pklr	NM_013631	0.0670956	0.00194684	24	16	29196.9	0.763806	0.054277	24	13.5	4693.21	1	0.15798	30	22	12237.1
6912213	1110007M04Rik	BC028764	0.0670956	0.00194684	22	16	3284.51	1	0.15798	24	14	3274.97	1	1	28.4	16.105	623.455
6921163	Gba2	NM_172692	0.0670956	0.00194684	24	10.5	871.262	0.36786	0.0130072	26	7	567.595	1	0.0842688	34	14	622.042
6929298	Abcb8	NM_029020	0.0670956	0.00194684	22	9	575.656	1	1	28.4	10.005	188.29	1	1	28.4	11.185	173.391
6932517	2011-09-11	NM_001009818	0.0670956	0.00194684	24	1	1385.65	1	0.846691	24	19	0	1	0.416347	12	1	323.784
6934216	Setd1b	BC038367	0.0670956	0.00194684	25	8	276.479	1	1	28.4	11.72	55.4195	1	1	28.4	12.19	52.5748
6939320	Ppat	BC023841	0.0670956	0.00194684	24	12.5	4068.62	0.13439	0.00194684	24	12.5	5047.15	1	1	28.4	15.92	1624.86
6943387	N4bp2l1	NM_133898	0.0670956	0.00194684	24	13	1026.29	1	0.193236	26	6	1191.47	1	0.416347	24	18	492.217
6948906	Itpr1	NM_010585	0.0670956	0.00194684	24	16	1666.44	0.679025	0.0432758	26	13	725.633	1	1	28.4	13.15	224.439
6950092	Clec2h	NM_053165	0.0670956	0.00194684	24	7	914.501	0.606236	0.0343495	26	5	1260.35	1	0.0271394	26	20	1062.92
6957261	9630033F20Rik	BC147705	0.0670956	0.00194684	26	13	470.58	0.679025	0.0432758	22	14	341.674	1	0.104334	30	26	485.287
6966024	Egln2	NM_053208	0.0670956	0.00194684	22	10	2192.31	1	0.846691	14	8	434.659	1	1	28.4	13.38	382.734
6966274	Lrfn3	NM_175478	0.0670956	0.00194684	22	2	136.118	1	1	28.4	10.55	37.7821	1	1	28.4	11.4	170.054
6967210	Csrp3	NM_013808	0.0670956	0.00194684	21	6	603.374	0.0732044	0.000577302	24	3	911.036	0.924807	0.00776882	24	19.5	400.717
6969253	l7Rn6	NM_026304	0.0670956	0.00194684	27	21.5	1706.32	0.325243	0.0100785	27	16	606.167	1	1	28.4	13.55	39.6821
6969765	Neu3	NM_016720	0.0670956	0.00194684	24	20	246.568	1	1	28.4	15.175	86.069	1	0.712712	26	1	80.8223
6978968	Wwp2	NM_025830	0.0670956	0.00194684	24	4	284.257	1	0.193236	22	4	93.3381	1	0.712712	12	2	102.389
6980578	Rasa3	NM_009025	0.0670956	0.00194684	26	7	191.202	1	0.597883	20	7	98.1464	1	0.0432758	36	12	220.759
6981185	4930444A02Rik	BC027296	0.0670956	0.00194684	18	5	295.783	1	1	28.4	11.08	20.2416	1	1	28.4	11.545	69.0606
6992367	Prkar2a	NM_008924	0.0670956	0.00194684	24	20	4157.65	0.606236	0.0343495	24	16.5	2113.54	1	1	28.4	12.725	2160.07
7014115	Cldn2	NM_016675	0.0670956	0.00194684	26	25	1739.41	1	0.345572	24	23	608.253	1	1	28.4	11.135	630.183
6907224	Car14	NM_011797	0.0781893	0.00227209	22	2	4159.06	1	0.128645	24	14	7801.37	1	1	28.4	16.045	1139.19
4625113	---	---	0.0827882	0.00259733	26	5	1740.76	1	0.712712	20	9.5	937.341	1	0.416347	36	12.25	1982.87
4658899	---	---	0.0827882	0.00259733	24	14	15456.8	0.839358	0.067776	32	11	4332.23	1	1	28.4	16.525	1784.11
4889543	---	---	0.0827882	0.00259733	23.3333	15.6667	4896.27	1	0.846691	28	10	2472.26	1	1	28.4	16.89	1411.81
5471211	---	---	0.0827882	0.00259733	28	22.5	3055.55	1	1	28.4	19.14	2135.35	1	1	28.4	16.17	824.545
6748646	Cnnm3	ENSMUST00000097776	0.0827882	0.00259733	26	0	525.38	0.946178	0.0842688	18	5	422.991	1	0.0432758	34	4	346.694
6761692	Steap3	NM_001085409	0.0827882	0.00259733	26	0	1488.46	0.946178	0.0842688	21	3.5	1740.54	1	1	28.4	10.485	425.891
6764562	Ahctf1	NM_026375	0.0827882	0.00259733	25	21	5744.43	1	1	28.4	13.17	85.5299	1	1	28.4	14.995	552.952
6765734	Zc3h12d	NM_172785	0.0827882	0.00259733	24	2	291.894	1	0.597883	23	3.5	366.14	0.741167	0.00454255	28	11	268.983
6774343	X99384	NM_013753	0.0827882	0.00259733	22	7	142.199	0.839358	0.067776	26	3	80.6809	1	1	28.4	10.625	5.57129
6774738	1700040L02Rik	BC087900	0.0827882	0.00259733	24	9	248.053	0.839358	0.067776	26	5	370.948	0.488427	0.00194684	30	16	268.63
6779834	Mpg	NM_010822	0.0827882	0.00259733	22	10	78.9838	1	1	28.4	15.62	8.3481	1	1	28.4	10.75	30.827
6782704	Poldip2	NM_026389	0.0827882	0.00259733	24	12	4833.5	0.0434602	0.000216072	24	10.5	4317.24	1	0.416347	24	23	879.287
6800427	Dnajb9	NM_013760	0.0827882	0.00259733	12	2	18840.5	1	0.285775	20	12	18550.1	1	1	28.4	17.52	10400.9
6805468	Dcdc2a	NM_177577	0.0827882	0.00259733	24	23	104.086	1	0.285775	24	12.5	61.6597	1	1	28.4	10.435	13.2042
6812250	1300014I06Rik	NM_025831	0.0827882	0.00259733	26	24	2459.53	0.763806	0.054277	18	7	0	1	1	28.4	11.175	241.69
6818956	Ang	NM_007447	0.0827882	0.00259733	24	10	23283.4	1	1	28.4	13.36	12144.6	1	1	28.4	14.575	5366.12
6824142	Tspan14	NM_145928	0.0827882	0.00259733	24	1	1722.87	1	1	28.4	11.705	61.9892	1	1	28.4	9.48	419.211
6824229	Ddhd1	NM_001042719	0.0827882	0.00259733	24	23	3342.28	1	1	28.4	18.16	194.372	1	1	28.4	14.415	667.838
6840637	Itgb5	NM_010580	0.0827882	0.00259733	22	3	2973.1	1	1	28.4	15.51	504.547	1	1	28.4	10.015	827.171
6841019	Zbtb20	NM_019778	0.0827882	0.00259733	22	15	2585.11	1	0.193236	20	5	918.037	1	1	28.4	10.15	820.975
6843340	Dopey2	NM_027293	0.0827882	0.00259733	22	16	1966.46	1	0.285775	26	14	2544.31	1	0.067776	34	2	1030.75
6852130	Ypel5	NM_027166	0.0827882	0.00259733	22	13	6068.89	1	1	28.4	11.34	76.0242	1	1	28.4	15.535	579.53
6854335	Amdhd2	NM_172935	0.0827882	0.00259733	26	11.5	745.008	0.540748	0.0271394	24	10	553.523	1	0.345572	20	3.5	372.822
6855801	Foxp4	NM_001110824	0.0827882	0.00259733	24	8	248.265	1	0.846691	24	11	0	1	1	28.4	10.58	83.4372
6871837	Vps13a	NM_173028	0.0827882	0.00259733	24	14.5	492.429	0.606236	0.0343495	28	15	434.022	1	1	28.4	16.2	82.3596
6875094	Pter	NM_008961	0.0827882	0.00259733	24	1	31503.8	0.0990341	0.00107387	24	22	8627.62	1	0.067776	26	9	24483.7
6875748	Bmyc	NM_023326	0.0827882	0.00259733	32	0	232.78	1	1	28.4	15.65	28.0272	1	1	28.4	9.285	79.5637
6878031	Itga6	NM_008397	0.0827882	0.00259733	22	1	143.826	1	0.416347	16	9	402.909	1	1	28.4	14.465	29.0709
6885530	Vav2	NM_009500	0.0827882	0.00259733	25	8.5	551.685	1	1	28.4	9.295	87.6515	1	1	28.4	11.13	95.1769
6887282	Grb14	NM_016719	0.0827882	0.00259733	23	5.5	2602.75	0.946178	0.0842688	22	5	2703.91	1	1	28.4	11.02	831.607
6888016	Zfp385b	NM_178723	0.0827882	0.00259733	24	12	391.171	1	1	28.4	16.565	12.263	1	1	28.4	11.545	218.277
6890597	Fbn1	NM_007993	0.0827882	0.00259733	24	3	113.42	1	1	28.4	13.16	23.6513	1	1	28.4	11.045	16.5739
6892286	Snta1	NM_009228	0.0827882	0.00259733	26	14	267.145	1	1	28.4	14.115	110.028	1	1	28.4	11.355	27.971
6892376	Gss	NM_008180	0.0827882	0.00259733	22	11	2616.72	0.679025	0.0432758	26	9	2395.54	1	1	28.4	17.66	432.698
6893147	B4galt5	NM_019835	0.0827882	0.00259733	22	14	3403.8	0.0434602	0.000216072	24	13	1912.37	1	1	28.4	16.385	537.515
6906564	9930021J17Rik	NM_172682	0.0827882	0.00259733	24	2	172.746	1	0.345572	22	2	181.373	1	0.285775	28	8.5	48.9318
6907124	Zfp687	NM_030074	0.0827882	0.00259733	26	4	492.853	1	1	28.4	12.575	97.708	1	1	28.4	11.345	38.3365
6910289	Prkacb	NM_011100	0.0827882	0.00259733	24	13	2338.4	1	0.193236	26	5	689.005	1	1	28.4	14.255	467.435
6912887	Nfx1	NM_023739	0.0827882	0.00259733	24	8	2152.79	0.0732044	0.000577302	24	6	2338.33	1	0.021342	30	16	2148.19
6912945	Galt	NM_016658	0.0827882	0.00259733	24	2	2416.47	1	1	28.4	13.675	348.076	1	1	28.4	10.425	841.181
6924181	Prkaa2	NM_178143	0.0827882	0.00259733	26	13	4060.98	1	0.104334	30	12.5	2116.34	1	1	28.4	14.825	40.8499
6925654	Serinc2	NM_172702	0.0827882	0.00259733	24	5	641.134	1	0.499811	27	8	399.02	1	1	28.4	12.945	182.096
6926504	Tmem51	NM_145402	0.0827882	0.00259733	26	6	111.157	1	1	28.4	11.005	18.0927	1	1	28.4	9.82	4.16451
6928457	Cdk6	NM_009873	0.0827882	0.00259733	24	9	1191.05	1	0.193236	24	6	1265.58	1	0.104334	36	14	3223.63
6929647	Mapre3	NM_133350	0.0827882	0.00259733	22	7	756.675	1	1	28.4	16.89	199.5	1	1	28.4	10.615	157.196
6934645	2410018M08Rik	NM_183088	0.0827882	0.00259733	14	8	281.216	1	1	28.4	13.815	79.3066	1	0.235442	36	17	114.551
6935039	Fis1	NM_025562	0.0827882	0.00259733	28	13	2419.72	1	1	28.4	13.76	237.837	1	1	28.4	15.52	869.27
6935118	Cnpy4	NM_178612	0.0827882	0.00259733	26	23	536.977	0.679025	0.0432758	26	17	154.503	1	0.0130072	27.5	5.25	245.932
6954638	Tgoln1	NM_009443	0.0827882	0.00259733	26	24	3029.53	1	1	28.4	13.925	1053.55	1	1	28.4	16.59	224.034
6962155	Stard5	NM_023377	0.0827882	0.00259733	26	13	15766.1	1	1	28.4	12.185	1107.87	1	0.0343495	36	18	4469.37
6963137	Trim34	NM_030684	0.0827882	0.00259733	22	4	189.363	0.279725	0.00776882	22	3	61.5183	1	0.345572	31	10	116.637
6966910	Tbc1d17	NM_001042655	0.0827882	0.00259733	23	6.5	1279.44	0.279725	0.00776882	27	3	1589.68	1	1	28.4	11.14	263.63
6979451	Hsd17b2	NM_008290	0.0827882	0.00259733	24	2	25134.4	1	0.193236	18	12	4955.33	1	0.712712	26	20	28124.5
7009793	Otud5	NM_138604	0.0827882	0.00259733	22	7	1019.86	0.36786	0.0130072	22	5	238.649	1	1	28.4	10.63	102.017
4327968	---	---	0.102256	0.00344478	26	0	56.3564	1	1	28.4	15.995	17.9715	1	1	28.4	11.56	13.1748
4655790	---	---	0.102256	0.00344478	26	12	952.119	1	1	28.4	10.425	151.231	1	1	28.4	12.025	70.0163
4950808	---	---	0.102256	0.00344478	12	10	10.748	1	1	28.4	15.28	0.455023	1	0.458079	28	10	16.5463
5480995	---	---	0.102256	0.00344478	26	13	7241.69	1	1	28.4	13.045	1677.94	1	1	28.4	17.205	1846.05
5598471	---	---	0.102256	0.00344478	30	9	150.472	1	1	28.4	12.55	74.615	1	1	28.4	13.045	10.6798
6752980	Yod1	NM_178691	0.102256	0.00344478	26	13	330.148	0.679025	0.0432758	20	13	541.22	1	1	28.4	16.055	117.897
6760711	Hdac4	NM_207225	0.102256	0.00344478	26	11	299.955	1	1	28.4	10.38	37.5226	1	1	28.4	11.43	46.6036
6783063	Acaca	NM_133360	0.102256	0.00344478	24	14	8068.02	1	0.597883	30	17	5478.95	1	1	28.4	14.08	493.902
6788271	Leap2	NM_153069	0.102256	0.00344478	26	22	7374.49	1	0.846691	16	7	176.282	1	0.846691	32	1	3611.34
6788676	Zkscan17	NM_172941	0.102256	0.00344478	22	9	835.659	0.0434602	0.000216072	24.6667	3	360.059	1	0.15798	26	19	62.084
6791048	Ngfr	NM_033217	0.102256	0.00344478	20	6	267.074	1	1	28.4	13.37	78.8046	1	1	28.4	10.155	74.2169
6791428	Acly	NM_134037	0.102256	0.00344478	24	20	45467.1	1	1	28.4	14.625	5389.58	1	1	28.4	13.175	4433.09
6791437	Dhx58	NM_030150	0.102256	0.00344478	24	3	339.553	1	1	28.4	13.675	0	1	0.345572	29	12	152.629
6796184	Hspa2	NM_008301	0.102256	0.00344478	22	17	77.6403	1	1	28.4	10.085	16.5937	1	0.846691	26	22	48.7904
6805450	BC005537	NM_024473	0.102256	0.00344478	24	17	18956	1	0.104334	34	18	6851.02	1	1	28.4	16.185	2489.91
6822959	Ube2e2	NM_144839	0.102256	0.00344478	22	10	1564.83	1	0.345572	26	8	0	1	0.067776	24	21	1061.37
6825704	Bmp1	NM_009755	0.102256	0.00344478	24	21.5	4656.79	1	1	28.4	12.145	640.472	1	1	28.4	15.335	136.531
6828005	Tmtc4	NM_028651	0.102256	0.00344478	24	12	265.66	1	0.345572	22	6	251.518	1	0.193236	35.3333	14.6667	290.809
6837301	Rangap1	NM_011241	0.102256	0.00344478	26	13	1846.4	0.24129	0.00595676	26	12	2223.71	1	1	28.4	16.035	492.926
6838392	Rnd1	NM_172612	0.102256	0.00344478	26	23	618.223	0.839358	0.067776	20	3.5	213.9	1	1	28.4	9.975	259.229
6843833	Carhsp1	NM_025821	0.102256	0.00344478	24	5	1842.79	1	0.15798	20	7	3476.77	1	0.345572	33	15	2640.97
6869545	Pde6c	NM_033614	0.102256	0.00344478	24	9	18.6676	1	0.193236	26	7	7.63675	1	0.0487764	24	21	10.9602
6873230	Slc25a28	NM_145156	0.102256	0.00344478	28	10	597.152	0.279725	0.00776882	24	9	552.392	1	1	28.4	12.255	48.0666
6891096	Prei4	NM_028802	0.102256	0.00344478	26	9	24186.2	0.0376854	0.000153442	24	6	16291.2	0.307197	0.00078998	32	15	20057.9
6893020	Prkcbp1	NM_027230	0.102256	0.00344478	24	0	898.521	0.24129	0.00595676	22	1	434.022	0.741167	0.00454255	26	9	596.445
6896835	4932438A13Rik	BC079623	0.102256	0.00344478	24	23	3370.78	0.0190961	3.60118e-05	24	23	1313.38	1	1	28.4	11.56	270.14
6899756	Hfe2	NM_027126	0.102256	0.00344478	22	2	6139.53	1	1	28.4	14.635	623.91	1	1	28.4	10.525	1534.93
6913002	Rusc2	NM_001037709	0.102256	0.00344478	20	15	935.007	1	0.15798	26	13	395.131	1	1	28.4	16.3	145.491
6922004	Lpar1	NM_010336	0.102256	0.00344478	16	10	36.9817	1	1	28.4	16.56	7.17643	1	0.15798	30	27	87.8227
6924247	Acot11	NM_025590	0.102256	0.00344478	22	16	293.379	1	0.846691	24	14.5	294.687	1	1	28.4	10.58	28.665
6926864	Clcn6	NM_011929	0.102256	0.00344478	26	23	236.244	1	0.499811	24	19.5	64.276	1	0.712712	12	1.5	166.771
6929366	Galnt11	NM_144908	0.102256	0.00344478	24	13	289.49	1	1	28.4	11.535	157.461	1	1	28.4	14.945	100.122
6931168	0610040J01Rik	BC004797	0.102256	0.00344478	24	11	940.452	1	1	28.4	12.245	154.386	1	1	28.4	13.63	172.793
6939315	Aasdh	NM_173765	0.102256	0.00344478	24	23	179.039	1	1	28.4	12.975	33.6965	1	1	28.4	10.005	69.6249
6942192	Gusb	NM_010368	0.102256	0.00344478	22	18	632.153	1	1	28.4	10.605	142.518	1	1	28.4	12.88	58.4166
6942692	Tmem184a	NM_144914	0.102256	0.00344478	22	6	541.856	0.839358	0.067776	20	6	512.652	1	0.235442	32	11	440.528
6942960	Baiap2l1	NM_025833	0.102256	0.00344478	24	14	1475.66	0.028443	7.55815e-05	24	12	2134.68	1	1	28.4	16.595	778.906
6945011	Irf5	NM_012057	0.102256	0.00344478	24	4.5	610.198	1	0.779701	22	7	558.685	1	1	28.4	11.035	123.886
6946971	Tmem150	NM_144916	0.102256	0.00344478	24	19	8115.89	1	0.846691	26	13	3019.42	1	0.15798	36	34	4730.83
6949797	Lpcat3	NM_145130	0.102256	0.00344478	12	8	9214.87	1	1	28.4	12.8	1122.63	1	1	28.4	12.055	2025.11
6955205	Pcyox1	NM_025823	0.102256	0.00344478	28	15	5529.15	1	0.597883	32	9	7540.09	1	1	28.4	16.185	936.247
6955381	Mcm2	NM_008564	0.102256	0.00344478	22	20	148.634	1	1	28.4	10.875	26.1078	1	1	28.4	10.305	27.8618
6960298	Nup62	NM_053074	0.102256	0.00344478	24	20	1056.63	1	1	28.4	11.72	15.4616	1	0.0130072	30	28	559.675
6965202	Pnpla2	NM_025802	0.102256	0.00344478	24	8.5	3176.59	0.13439	0.00194684	24	7.5	2385.35	1	0.067776	30	16	1989.59
6965211	Ap2a2	NM_007459	0.102256	0.00344478	26	25	3551.66	1	1	28.4	12.205	333.276	1	0.0842688	30	3	2128.25
6971344	2410015N17Rik	BC004623	0.102256	0.00344478	26	15	1751.43	1	0.712712	26	9	0	1	1	28.4	16.415	286.709
6971746	Uros	NM_009479	0.102256	0.00344478	22	2	99.1364	1	1	28.4	14.245	113.282	1	1	28.4	13.195	48.6631
6980167	Slc10a2	NM_011388	0.102256	0.00344478	22	19	3998.76	1	1	28.4	14.33	442.609	1	1	28.4	13.575	483.078
6981091	1810011O10Rik	NM_026931	0.102256	0.00344478	24	17	5086.71	0.679025	0.0432758	22	11	3577.39	1	1	28.4	16.905	467.281
6984413	Amfr	NM_011787	0.102256	0.00344478	26	14	6329.52	1	1	28.4	11.28	717.597	1	0.054277	30	23.5	3113.96
6988769	Apoa1	NM_009692	0.102256	0.00344478	28	12	76117.9	1	0.193236	29.3333	6.33333	43727.4	1	1	28.4	11.805	14737.4
6992328	Nicn1	NM_025449	0.102256	0.00344478	24	1	1697.76	1	1	28.4	14.15	143.016	1	1	28.4	14.855	355.796
6998396	Srprb	NM_009275	0.102256	0.00344478	12	3	669.064	0.0434602	0.000216072	24	12.5	1515.97	1	1	28.4	16.435	518.997
7017630	G6pdx	NM_008062	0.102256	0.00344478	22	0	1809.91	1	0.104334	18	7	246.568	1	1	28.4	11.73	6.66271
6805386	Hist1h1a	NM_030609	0.118249	0.00399367	26	23	11.0309	1	1	28.4	10.395	3.96192	1	1	28.4	13.22	1.32795
6833157	Prpf40b	NM_018786	0.118249	0.00399367	26	6	144.957	1	0.15798	26	3	48.2247	1	1	28.4	11.15	27.2194
4707700	---	---	0.124985	0.00454255	24	12	12787.6	1	0.712712	32	5	1579.18	1	0.499811	36	19	8419.73
4800894	---	---	0.124985	0.00454255	26	13	4823.1	1	1	28.4	10.6	851.97	1	1	28.4	16.12	391.832
5065999	---	---	0.124985	0.00454255	26	3	5258.26	1	1	28.4	12.165	2632.08	1	1	28.4	11.75	7919.69
5372466	---	---	0.124985	0.00454255	12	0	246.427	1	1	28.4	15.695	31.1244	1	0.597883	12	1	94.9644
5374844	---	---	0.124985	0.00454255	22	9	9455.79	1	1	28.4	16.43	1905.43	1	1	28.4	10.695	370.928
5580442	---	---	0.124985	0.00454255	22	8	630.951	1	1	28.4	13.895	654.513	1	0.0271394	36	13	3491.83
6748020	Gsta3	NM_001077353	0.124985	0.00454255	24	19	23117.2	1	0.499811	40	15.5	43227.6	1	1	28.4	12.52	14620.5
6758027	Tbc1d8	NM_018775	0.124985	0.00454255	24	13	679.6	1	0.104334	24	11.5	21.1425	1	0.193236	24	4	335.522
6769197	Cirbp	NM_007705	0.124985	0.00454255	24	6	1052.39	0.420845	0.0167025	25	5	1236.13	0.307197	0.00078998	26	17	864.084
6771224	Gns	NM_029364	0.124985	0.00454255	24	12	2354.31	1	0.712712	30	8	2887.54	1	1	28.4	12.32	639.578
6778376	Tbc1d10a	NM_134023	0.124985	0.00454255	26	8	320.532	1	0.128645	28	5	172.393	1	0.499811	38	12.5	110.662
6782443	Tlcd2	NM_027249	0.124985	0.00454255	24	22	11349.1	1	1	28.4	16.655	3676.61	1	1	28.4	14.945	4831.92
6783845	Hoxb4	NM_010459	0.124985	0.00454255	14	12	57.9828	0.839358	0.067776	16	14	57.6292	1	0.846691	36.8	31.6	36.5998
6784218	Stat5a	NM_011488	0.124985	0.00454255	22	3	269.549	1	1	28.4	12.595	292.898	1	1	28.4	10.045	341.984
6803895	Akt1	NM_009652	0.124985	0.00454255	22	14	1345.91	1	1	28.4	13.84	302.707	1	1	28.4	15.195	427.888
6804523	Akr1c14	NM_134072	0.124985	0.00454255	24	14	38195.6	1	1	28.4	12.79	1943.23	1	0.193236	30	17	30216.2
6804703	U2af2	NM_133671	0.124985	0.00454255	24	7	386.434	1	1	28.4	15.855	129.043	1	1	28.4	11.545	62.2014
6817412	Samd8	NM_026283	0.124985	0.00454255	12	7	2645.5	1	0.104334	20	5	1405.09	1	1	28.4	9.42	304.981
6818667	Samd4	NM_001037221	0.124985	0.00454255	24	8	111.44	1	1	28.4	11.13	88.8229	1	1	28.4	15.91	23.7408
6832105	Xpnpep3	NM_177310	0.124985	0.00454255	26	14	1118.78	0.24129	0.00595676	26	12	787.788	1	1	28.4	15.705	219.544
6832542	1300018J18Rik	NM_027905	0.124985	0.00454255	22	9	1862.02	0.36786	0.0130072	24	6	1359.98	1	0.0167025	26	18	2798.16
6836797	Nrbp2	NM_144847	0.124985	0.00454255	22	15	738.29	0.420845	0.0167025	24	14	260.71	1	1	28.4	12.84	813.619
6838287	Slc38a4	NM_027052	0.124985	0.00454255	24	10	24709	0.36786	0.0130072	22	5	19270.1	1	0.0432758	24	15	44515.6
6849474	Phf1	NM_009343	0.124985	0.00454255	24	6	228.961	0.946178	0.0842688	22	4	118.511	1	1	28.4	12.805	52.1986
6850071	Rdbp	NM_001045864	0.124985	0.00454255	24	3	470.155	1	0.597883	16	7.5	635.265	1	0.712712	12	1	442.649
6856192	Stap2	NM_145934	0.124985	0.00454255	22	13	1871.29	1	0.712712	40	33	1064.9	1	1	28.4	13.07	436.171
6857984	Mcfd2	NM_176808	0.124985	0.00454255	26	22	1680.86	0.13439	0.00194684	24	17	1216.72	1	1	28.4	14.705	820.543
6864444	Stard4	NM_133774	0.124985	0.00454255	22	11	9763.8	1	1	28.4	12.055	171.681	1	1	28.4	10.05	675.485
6866238	Ccbe1	NM_178793	0.124985	0.00454255	24	14	143.684	1	1	28.4	14.6	4.68458	1	1	28.4	11.975	64.2435
6871144	Scyl1	NM_023912	0.124985	0.00454255	24	7	787.646	1	0.499811	20	10	273.155	1	0.712712	20	19	265.731
6871259	Esrra	NM_007953	0.124985	0.00454255	24	14	99.5606	0.474693	0.021342	22	13	414.011	1	0.0842688	28	0	200.323
6873068	Sorbs1	NM_178362	0.124985	0.00454255	24	8	1538.38	0.182667	0.00344478	22	5	782.979	0.842323	0.00595676	33	14	1311.9
6875722	Abca2	NM_007379	0.124985	0.00454255	26	2	1388.47	1	1	28.4	12.175	167.402	1	0.15798	34	6	866.842
6883654	Pck1	NM_011044	0.124985	0.00454255	24	12	116540	1	0.345572	22	10	7542.57	1	1	28.4	16.205	5564.13
6885749	D2Wsu81e	BC078441	0.124985	0.00454255	26	14	210.647	0.36786	0.0130072	26	13	581.03	1	1	28.4	15.73	9.0195
6890382	Hisppd2a	NM_178795	0.124985	0.00454255	25	1	84.4993	1	0.846691	26	20	29.9106	1	1	28.4	9.59	29.6592
6892138	Rbck1	NM_019705	0.124985	0.00454255	23	10.5	743.417	0.24129	0.00595676	14	10	531.249	1	0.054277	40	9.5	312.258
6916239	Ttc39a	ENSMUST00000064129	0.124985	0.00454255	22	17	49.9217	1	1	28.4	14.19	3.6865	1	1	28.4	16.39	0
6916663	Slc6a9	NM_008135	0.124985	0.00454255	24	12	1758.79	0.279725	0.00776882	28	7	1661.06	1	1	28.4	13.25	91.2564
6917809	Id3	NM_008321	0.124985	0.00454255	24	22.5	2361.81	1	1	28.4	12.74	190.615	1	0.597883	29	0.5	897.142
6919417	Tox	NM_145711	0.124985	0.00454255	26	9	638.447	1	1	28.4	14.85	101.049	1	0.0271394	32	15	168.857
6941150	2900026A02Rik	NM_172884	0.124985	0.00454255	26	8	1210.78	1	0.193236	30	9	730.724	1	1	28.4	9.71	282.692
6941261	2410014A08Rik	NM_175403	0.124985	0.00454255	12	3	2170.04	0.474693	0.021342	26	13	1285.03	1	0.128645	30	27	1527.07
6942380	Eln	NM_007925	0.124985	0.00454255	24	2	117.168	1	1	28.4	12.38	6.17304	1	1	28.4	15.835	28.0177
6949841	Ing4	NM_133345	0.124985	0.00454255	22	3	793.02	1	1	28.4	15.42	179.846	1	1	28.4	11.53	227.008
6955268	Arhgap25	NM_001037727	0.124985	0.00454255	24	5	121.622	1	1	28.4	10.38	21.9822	1	1	28.4	11.33	7.51584
6955291	Rab43	NM_001039394	0.124985	0.00454255	24	13	6827.47	1	1	28.4	11.705	2290.71	1	0.15798	38	17	3157.66
6959167	Arhgef1	NM_008488	0.124985	0.00454255	27	6	367.201	1	1	28.4	12.44	30.4558	1	1	28.4	10.1	70.4932
6959291	Adck4	NM_133770	0.124985	0.00454255	26	8	323.006	1	0.712712	26	7	251.801	1	1	28.4	13.7	117.793
6959300	Blvrb	NM_144923	0.124985	0.00454255	28	13	3058.17	1	1	28.4	13.2	163.147	1	0.128645	24	0	1363.94
6968830	BC048679	AY226992	0.124985	0.00454255	16	10	38.3252	1	1	28.4	12.67	1.83636	1	1	28.4	15.45	22.5949
6972110	Tubgcp2	NM_133755	0.124985	0.00454255	22	8	292.035	1	1	28.4	13.255	118.213	1	1	28.4	11.315	102.896
6977251	Hmgb2l1	NM_178017	0.124985	0.00454255	24	2	175.362	1	0.175608	24	23	106.137	1	0.067776	30	8	125.37
6977779	Hook2	NM_133255	0.124985	0.00454255	24	8.5	317.809	0.839358	0.067776	21	5.5	174.726	1	1	28.4	10.765	30.4728
6984899	Tk2	NM_021028	0.124985	0.00454255	22	8	409.981	0.606236	0.0343495	22	6	536.553	1	0.0343495	34	14	467.751
6992490	Epm2aip1	NM_175266	0.124985	0.00454255	22	20	514.986	0.946178	0.0842688	26	14	587.818	1	1	28.4	14.97	212.901
6992885	Acvr2b	NM_007397	0.124985	0.00454255	26	10	73.6098	1	1	28.4	16.575	18.2914	1	1	28.4	10.78	32.8957
6998596	Armet	NM_029103	0.124985	0.00454255	12	3	11772.2	0.0128763	1.65562e-05	24	13	12007.7	1	1	28.4	15.32	3568.07
6998668	Apeh	NM_146226	0.124985	0.00454255	26	11	1956.64	0.946178	0.0842688	26	9	1865.42	1	1	28.4	11.71	210.744
6998879	Pthr1	NM_011199	0.124985	0.00454255	22	6	435.366	1	1	28.4	13.385	97.4177	1	1	28.4	10.865	26.8577
5095542	---	---	0.1441	0.00524966	22	7	2.68701	1	1	28.4	14.03	0.28956	1	1	28.4	14.03	0.108894
6968708	Polg	NM_017462	0.1441	0.00524966	24.6667	8.33333	392.586	1	0.345572	39	36.5	305.399	1	1	28.4	9.935	99.8947
4376859	---	---	0.150415	0.00595676	24	12	593.828	1	1	28.4	15.1	51.302	1	1	28.4	13.54	261.581
4414053	---	---	0.150415	0.00595676	26	12	439.538	1	1	28.4	17.265	50.5546	1	1	28.4	15.205	15.0815
4452866	---	---	0.150415	0.00595676	26	23	350.513	1	1	28.4	14.275	176.674	1	1	28.4	15.77	25.5651
4457832	---	---	0.150415	0.00595676	32	14	77.2868	1	1	28.4	18.235	82.0477	1	1	28.4	11.53	16.232
5229744	---	---	0.150415	0.00595676	24	11	37.4767	1	1	28.4	15.66	2.86272	1	1	28.4	7.735	20.4577
5589065	---	---	0.150415	0.00595676	26	14	54.5179	1	1	28.4	12.885	2.38507	1	1	28.4	18.875	5.96657
5607998	---	---	0.150415	0.00595676	26	19	381.272	1	1	28.4	15.505	39.4201	1	1	28.4	10.015	37.9564
6748645	Cnnm4	NM_033570	0.150415	0.00595676	26	20	155.846	0.36786	0.0130072	26	16	135.552	0.627918	0.00344478	28	4	217.789
6749704	Aox3	NM_023617	0.150415	0.00595676	24	6	19061.7	1	0.128645	22	6	9833.73	1	0.054277	25	18	15299.8
6757157	Jph1	NM_020604	0.150415	0.00595676	24	13	215.243	1	1	28.4	13.87	85.9453	1	0.15798	22	4	113.066
6759775	1810031K17Rik	BC013714	0.150415	0.00595676	24	8	1082.58	1	0.597883	24	3.5	947.947	1	1	28.4	10.855	179.57
6764832	Hlx	NM_008250	0.150415	0.00595676	38	5	56.215	1	0.597883	14	13	67.953	1	1	28.4	16.605	30.0778
6769267	Eef2	NM_007907	0.150415	0.00595676	26	10	23996.8	1	1	28.4	10.77	5249.96	1	0.416347	28	27	3959.02
6771643	Usp52	NM_133992	0.150415	0.00595676	24	4	709.44	1	0.712712	20	6	175.575	1	1	28.4	10.3	198.062
6775322	C030046I01Rik	NM_177994	0.150415	0.00595676	22	11	1096.51	1	1	28.4	13.18	397.821	1	1	28.4	11.735	112.532
6776667	Tmtc2	NM_177368	0.150415	0.00595676	24	11	316.501	1	1	28.4	11.35	66.4511	1	1	28.4	13.015	106.046
6782147	Kif1c	NM_153103	0.150415	0.00595676	24	5	2166.86	1	1	28.4	13.19	673.553	1	1	28.4	11.99	694.085
6783182	Bcas3	NM_138681	0.150415	0.00595676	24	10	820.597	1	0.15798	28	6	597.364	1	0.0167025	34	14	694.662
6785261	2011-09-09	NM_001113486	0.150415	0.00595676	24	1	2111.42	1	0.128645	28	18	1573.17	1	0.597883	12	2	251.659
6789419	Pelp1	NM_029231	0.150415	0.00595676	26	2	244.376	1	1	28.4	9.325	26.7467	1	1	28.4	10.5	109.018
6792301	Cpsf4l	NM_026682	0.150415	0.00595676	22	14	120.491	1	1	28.4	15	38.7922	1	0.285775	24	17.5	84.1457
6792760	Nploc4	NM_199469	0.150415	0.00595676	22	11	3195.84	1	0.235442	22	11	1733.19	1	1	28.4	12.64	1123.07
6798213	Tnfaip2	NM_009396	0.150415	0.00595676	26	24.5	1587.6	0.0350383	0.000108124	22	2	1389.18	1	0.285775	32	4	203.293
6806544	Hivep1	NM_007772	0.150415	0.00595676	14	6	900.359	1	0.712712	30	16	300.874	1	1	28.4	10.63	214.66
6808314	Glrx	NM_053108	0.150415	0.00595676	24	15	6354.56	1	0.193236	26	14	2128.04	1	0.128645	32	24.5	817.734
6811686	Hist1h2be	NM_178194	0.150415	0.00595676	22	0	171.261	1	1	28.4	17.29	28.4766	1	0.0343495	28	10	64.5588
6817954	Mustn1	NM_181390	0.150415	0.00595676	24	3	356.24	1	0.779701	16	12	457.003	1	0.499811	24	0	249.892
6818153	Gdf10	NM_145741	0.150415	0.00595676	28	22	158.675	1	0.193236	26	18	155.069	1	1	28.4	11.455	64.6441
6819596	Sacs	ENSMUST00000074447	0.150415	0.00595676	26	14	90.9339	1	1	28.4	11.585	7.74423	1	1	28.4	15.59	22.5415
6826116	9030625A04Rik	BC116748	0.150415	0.00595676	22	19	875.61	1	1	28.4	14.215	301.64	1	0.0130072	12	1	682.924
6842273	Gbe1	NM_028803	0.150415	0.00595676	26	14	18442.5	1	1	28.4	18.12	4755.42	1	0.846691	28	22	11736.3
6848940	Riok2	NM_025934	0.150415	0.00595676	24	14	2296.97	0.606236	0.0343495	24	14	1913.29	1	1	28.4	15.205	378.128
6849397	Wdr24	NM_173741	0.150415	0.00595676	22	6	279.378	1	1	28.4	15.585	70.1294	1	1	28.4	9.815	82.2634
6850080	Neu1	NM_010893	0.150415	0.00595676	22	9	839.548	1	0.15798	34	0	405.667	1	0.285775	28	17	549.705
6854340	Tbc1d24	NM_173186	0.150415	0.00595676	24	11.5	634.345	0.15381	0.00259733	24	10.5	825.264	1	0.846691	24	23	0
6854346	1600002H07Rik	BC072612	0.150415	0.00595676	24	17	2318.82	0.0845496	0.00078998	24	13	3243.15	1	0.021342	24	4	2609.08
6859953	Kif20a	NM_009004	0.150415	0.00595676	26	2	20.3647	1	1	28.4	14.685	4.87515	1	1	28.4	16.29	3.19047
6861751	D18Ertd653e	BC096371	0.150415	0.00595676	22	9	1253.13	0.0990341	0.00107387	22	6	619.921	1	0.0167025	36	14.5	692.611
6864404	Gypc	NM_001048207	0.150415	0.00595676	22	19	1260.98	1	1	28.4	14.345	215.674	1	1	28.4	11.685	106.048
6866112	Fech	NM_007998	0.150415	0.00595676	22	12.5	1511.72	0.36786	0.0130072	23	6	1085.8	1	1	28.4	11.445	287.885
6871168	Capn1	NM_001110504	0.150415	0.00595676	26	7	396.616	1	0.416347	24	7.5	467.398	1	0.345572	35	12	425.572
6876055	5730472N09Rik	BC051404	0.150415	0.00595676	24	16	445.194	0.36786	0.0130072	24	14	1198.76	1	1	28.4	14.215	119.25
6876226	9130404D14Rik	BC027843	0.150415	0.00595676	20	8	64.4174	1	1	28.4	11.29	24.2718	1	1	28.4	14.025	34.2897
6877297	Gpd2	NM_010274	0.150415	0.00595676	22	10	2556.9	1	1	28.4	13.235	761.164	1	1	28.4	12.75	205.095
6880529	Nusap1	NM_133851	0.150415	0.00595676	24	1	6.71751	1	1	28.4	13.32	2.48654	1	1	28.4	14.89	0.0989949
6883020	Hnf4a	NM_008261	0.150415	0.00595676	24	13	15413.7	0.0434602	0.000216072	22	13	13144.1	0.627918	0.00344478	28	26	10425.9
6885414	Ptgds	NM_008963	0.150415	0.00595676	24	0	77.3575	1	1	28.4	16.85	26.8496	1	0.499811	40	35	39.8808
6888779	D2Ertd391e	BC023673	0.150415	0.00595676	24	6	1805.6	1	0.235442	30	4	1581.73	1	1	28.4	11.785	45.7332
6892831	Serinc3	NM_012032	0.150415	0.00595676	24	17	14993.7	1	0.345572	26	14	5410.29	1	1	28.4	16.905	3009.88
6893532	Bmp7	NM_007557	0.150415	0.00595676	24	11	60.1041	1	0.416347	20	14	42.9921	1	1	28.4	16.61	23.174
6901316	Elovl6	NM_130450	0.150415	0.00595676	24	15.5	42112.2	1	1	28.4	13.82	3699.58	1	0.15798	12	1.5	1120.94
6904856	Pcdh18	NM_130448	0.150415	0.00595676	26	23	96.3787	1	1	28.4	9.76	28.0987	1	1	28.4	11.185	23.2645
6908075	Gstm6	NM_008184	0.150415	0.00595676	24	4	225.355	1	1	28.4	14.71	2326.59	1	1	28.4	10.05	1169.55
6916089	Dhcr24	NM_053272	0.150415	0.00595676	22	14	71417.8	1	1	28.4	10.505	6874.58	1	1	28.4	14.295	17513.6
6917215	Zmym6	NM_177462	0.150415	0.00595676	23	11	925.921	0.15381	0.00259733	26	18	322.794	1	0.0343495	26	7	778.03
6917593	Nr0b2	NM_011850	0.150415	0.00595676	26	3	4280.33	0.420845	0.0167025	22	6	3131.49	1	1	28.4	12.575	66.6745
6918892	Errfi1	NM_133753	0.150415	0.00595676	22	16	92748.9	0.11916	0.00145043	22	11	182481	1	0.597883	23	2	64334.6
6932118	Stap1	NM_019992	0.150415	0.00595676	24	6	11.8794	1	1	28.4	14.07	0.292742	1	0.067776	34	13	18.1019
6934661	Ndufa12	ENSMUST00000020209	0.150415	0.00595676	26	17	687.379	1	1	28.4	12.205	89.9263	1	1	28.4	11.235	71.5811
6936729	Fastk	NM_023229	0.150415	0.00595676	24	9	620.628	1	0.345572	24	10	508.834	1	0.499811	24	20	184.908
6941675	Erp29	NM_026129	0.150415	0.00595676	22	20	782.272	1	1	28.4	11.62	149.246	0.488427	0.00194684	26	2	809.637
6951118	Ppfibp1	NM_026221	0.150415	0.00595676	24	4	263.327	0.540748	0.0271394	22	5	283.833	1	0.846691	30	12	32.6683
6955032	Tet3	ENSMUST00000056191	0.150415	0.00595676	24	8	197	1	1	28.4	10.71	102.156	1	1	28.4	10.71	39.8621
6960309	Pnkp	NM_021549	0.150415	0.00595676	22	4	631.305	1	1	28.4	12.09	56.8288	1	0.416347	34	3	156.907
6964517	Tacc2	NM_001004468	0.150415	0.00595676	24	0	439.325	0.839358	0.067776	22	21	183.848	1	0.499811	32	2	155.493
6969690	Uvrag	NM_178635	0.150415	0.00595676	24	12	964.918	1	0.128645	20	7	617.516	1	1	28.4	13.625	317.172
6983183	Upf1	NM_001122829	0.150415	0.00595676	24	15.5	449.791	0.24129	0.00595676	30	13	914.148	1	0.846691	32	2	414.647
6983692	Gab1	NM_021356	0.150415	0.00595676	24	12.5	527.961	1	0.128645	18	6	317.491	1	1	28.4	10.84	180.287
6991267	Adamts7	NM_001003911	0.150415	0.00595676	22	9	92.2774	1	1	28.4	10	19.5883	1	1	28.4	16.6	34.7073
6993851	Ccdc151	NM_029939	0.150415	0.00595676	24	18	61.6597	0.606236	0.0343495	24	13	39.0323	1	0.0271394	30	29	25.8094
6997730	Tbc1d2b	NM_194334	0.150415	0.00595676	22	11	1571.33	0.679025	0.0432758	26	9	855.882	1	1	28.4	13.7	149.569
6998640	Gnai2	NM_008138	0.150415	0.00595676	30	3.5	841.669	0.679025	0.0432758	24	11	1797.75	1	1	28.4	11.83	291.847
6999249	Tgfbr2	NM_009371	0.150415	0.00595676	22	11	603.728	0.763806	0.054277	32	1	322.653	1	0.499811	33	14	313.213
7002886	Hmgcs2	NM_008256	0.150415	0.00595676	20	9	3465.04	1	1	28.4	12.525	0	1	1	28.4	15.71	2294.68
6767270	Traf3ip2	NM_134000	0.172919	0.00686279	28	25	68.0237	1	1	28.4	10.025	38.1944	1	1	28.4	9.54	41.0574
6803020	Kcnk10	NM_029911	0.172919	0.00686279	26	8	19.304	1	1	28.4	15.725	14.4335	1	1	28.4	13.48	1.32052
4584203	---	---	0.18365	0.00776882	16	2	3.04056	1	1	28.4	9.81	1.32335	1	1	28.4	14.825	0.634275
4671479	---	---	0.18365	0.00776882	22	15	3390.08	1	0.104334	10	8	3155.53	1	0.499811	26	1	1748.6
4951242	---	---	0.18365	0.00776882	12	11	254.558	1	1	28.4	11.515	52.0982	1	1	28.4	11.215	4.41022
5160282	---	---	0.18365	0.00776882	24	12	1806.09	1	1	28.4	10.005	386.056	1	1	28.4	15.65	338.06
5291465	---	---	0.18365	0.00776882	24	0	38.1131	1	0.597883	20	2	6.92965	1	1	28.4	10.21	13.7281
5460792	---	---	0.18365	0.00776882	26	4	1614.75	1	1	28.4	12.46	586.97	1	1	28.4	12.47	710.53
6755163	Nr1i3	NM_009803	0.18365	0.00776882	24	11	8375.33	1	1	28.4	14.32	0	1	1	28.4	16.22	5088.4
6756536	Plxna2	NM_008882	0.18365	0.00776882	24	0	810.274	1	1	28.4	9.175	216.163	1	1	28.4	11.695	229.191
6775235	Lrrc3	NM_145152	0.18365	0.00776882	24	17	894.631	1	0.416347	22	17	652.377	1	0.235442	28	1	805.465
6775329	ORF61	NM_001003949	0.18365	0.00776882	20	11	1314.09	1	0.597883	32	2	2078.12	1	1	28.4	11.285	437.83
6777190	Lgr5	NM_010195	0.18365	0.00776882	24	6	296.773	0.36786	0.0130072	20	7	392.444	1	0.345572	28	11	443.427
6777915	Slc26a10	BC089587	0.18365	0.00776882	24	10	209.233	1	1	28.4	12.795	60.1186	1	0.499811	26	21	100.126
6781012	P4ha2	NM_011031	0.18365	0.00776882	22	18	260.498	0.0630733	0.000419011	26	14	476.095	0.488427	0.00194684	26	4	429.355
6783997	Ppp1r1b	NM_144828	0.18365	0.00776882	24	20	143.26	1	1	28.4	17.37	12.7424	1	1	28.4	16.4	67.8405
6784263	G6pc	NM_008061	0.18365	0.00776882	26	21	53414.6	1	1	28.4	16.62	11460.9	1	1	28.4	14.995	8446.14
6791995	Pitpnc1	NM_145823	0.18365	0.00776882	24	12	916.34	1	0.712712	28	10	162.776	1	1	28.4	11.525	135.89
6794073	Tssc1	NM_201357	0.18365	0.00776882	26	24	299.177	1	1	28.4	14.655	50.8608	1	0.128645	12	1	115.753
6796121	Rhoj	NM_023275	0.18365	0.00776882	24	2	143.189	0.763806	0.054277	16	10	0	1	1	28.4	11.31	90.5249
6796193	Plekhg3	NM_153804	0.18365	0.00776882	24	9	541.29	1	1	28.4	12.24	53.7836	1	1	28.4	11.37	120.119
6798312	Mta1	NM_054081	0.18365	0.00776882	24	6.5	562.008	1	1	28.4	8.92	214.995	1	1	28.4	11.37	366.324
6802088	Zfp36l1	NM_007564	0.18365	0.00776882	26	23	5384.19	1	1	28.4	14.32	748.909	1	1	28.4	9.97	1423.79
6807722	Ccrk	NM_053180	0.18365	0.00776882	28	22	127.491	1	0.416347	26	14	201.879	1	1	28.4	10.66	85.1781
6819259	Rec8	NM_020002	0.18365	0.00776882	22	10	63.0032	0.211129	0.00454255	26	4	18.5262	1	0.458079	30	15	23.6174
6824000	Gcap14	NM_027045	0.18365	0.00776882	24	15	1786.58	0.36786	0.0130072	28	11	2153.85	1	1	28.4	15.335	13.9827
6824610	Ndrg2	NM_013864	0.18365	0.00776882	22	11	7907.58	1	1	28.4	12.215	4982.82	1	0.15798	30	12.5	20172.3
6838754	Calcoco1	NM_026192	0.18365	0.00776882	22	8	704.632	0.0376854	0.000153442	24	2	427.941	0.488427	0.00194684	30	13	540.159
6839624	Snai2	NM_011415	0.18365	0.00776882	26	6	99.2071	1	1	28.4	12.15	417.952	1	0.0130072	28	13	268.488
6843634	Adcy9	NM_009624	0.18365	0.00776882	24	7	803.061	0.0990341	0.00107387	22	6	476.378	1	0.345572	34	11	816.779
6849044	Ppp2r1a	NM_016891	0.18365	0.00776882	22	8	1919.87	1	0.712712	36	18	596.409	1	1	28.4	10.6	411.926
6857441	Prkd3	NM_029239	0.18365	0.00776882	22	7	13201.5	0.182667	0.00344478	24	2	8369.6	1	1	28.4	11.535	1596.25
6870093	Trim8	NM_053100	0.18365	0.00776882	28	7	735.179	1	1	28.4	13.445	310.625	1	1	28.4	13.395	262.714
6876238	Angptl2	NM_011923	0.18365	0.00776882	26	10	535.421	0.839358	0.067776	22	8	311.268	1	1	28.4	12.315	111.207
6880219	BC052040	BC052040	0.18365	0.00776882	26	0	392.515	1	0.235442	23	2.5	404.005	1	0.128645	26	14	357.937
6882181	Pygb	NM_153781	0.18365	0.00776882	22	0	95.5301	1	0.712712	16	9	76.5797	1	1	28.4	12.725	13.4343
6889219	Ldlrad3	NM_178886	0.18365	0.00776882	24	11	414.152	1	1	28.4	10.69	146.988	1	1	28.4	11.385	18.1115
6892104	5430432M24Rik	NM_028666	0.18365	0.00776882	22	2	130.815	1	1	28.4	10.175	46.5927	1	0.15798	30	3	58.4424
6905356	Serp1	NM_030685	0.18365	0.00776882	24	18	19227.2	0.0845496	0.00078998	25	15	35845	1	0.15798	27	3	41265.4
6910938	Cth	NM_145953	0.18365	0.00776882	24	1	35317.8	1	1	28.4	12.63	2900.24	1	1	28.4	12.07	5213.66
6924365	Podn	NM_172874	0.18365	0.00776882	24	13.5	109.107	1	1	28.4	13.835	27.3424	1	1	28.4	15.075	42.2535
6924887	BC059842	BC059842	0.18365	0.00776882	26	24	261.488	1	0.416347	24	18	100.197	1	0.021342	30	5	243.245
6926654	Tnfrsf1b	NM_011610	0.18365	0.00776882	24	12.5	2150.45	0.540748	0.0271394	24	11	1448.44	1	0.846691	25	1	349.876
6926851	D4Wsu114e	NM_001025365	0.18365	0.00776882	24	7.5	242.255	0.839358	0.067776	40	33.5	143.472	1	1	28.4	11.62	34.2823
6928716	Steap4	NM_054098	0.18365	0.00776882	20	16	13629.1	0.946178	0.0842688	22	15	23164	1	0.712712	26	3	18817.2
6934401	Aacs	NM_030210	0.18365	0.00776882	22	16	11907.7	0.24129	0.00595676	24	16	13853.1	1	0.235442	12	1	4839.93
6934650	Crcp	NM_007761	0.18365	0.00776882	24	14	527.855	1	0.285775	24	13	782.696	1	0.597883	24	1	846.619
6935069	Gigyf1	NM_031408	0.18365	0.00776882	24	7	139.441	1	0.345572	22	2	174.231	1	1	28.4	9.93	54.0268
6935088	Tsc22d4	NM_023910	0.18365	0.00776882	26	5	267.993	0.763806	0.054277	23	6.5	310.526	1	0.458079	34	13	281.216
6936088	Rundc3b	NM_198620	0.18365	0.00776882	28	11	19.0212	1	1	28.4	10.395	0.00388909	1	0.712712	28	0	0
6954633	Elmod3	NM_144917	0.18365	0.00776882	24	22	137.603	1	1	28.4	13.275	22.8353	1	1	28.4	11.305	236.237
6959448	Sars2	NM_023637	0.18365	0.00776882	26	3	47.4469	1	1	28.4	13.235	27.1692	1	1	28.4	9.73	74.236
6960332	Nosip	NM_025533	0.18365	0.00776882	24	7	109.107	1	0.712712	40	32	168.009	1	1	28.4	10.425	55.247
6970442	Rnf141	NM_025999	0.18365	0.00776882	24	1.5	8700.95	0.679025	0.0432758	22	2	5302.88	1	1	28.4	10.25	1457.28
6974583	Defb50	NM_199067	0.18365	0.00776882	38	26	7.14178	1	1	28.4	17.2	0.146018	1	1	28.4	16.385	1.64049
6976200	Vegfc	NM_009506	0.18365	0.00776882	22	5	139.229	1	0.499811	18	9	133.077	1	1	28.4	9.825	33.9765
6982100	BC035537	NM_153535	0.18365	0.00776882	26	0	767.069	1	1	28.4	14.225	63.402	1	1	28.4	10.255	377.284
6985981	Chmp1a	NM_145606	0.18365	0.00776882	22	9	2409.68	1	0.499811	40	35	527.572	1	0.416347	24	20	194.737
6992164	Wdr51a	NM_027354	0.18365	0.00776882	26	14	62.0133	1	0.924583	28	9	23.0517	1	1	28.4	15.57	4.72842
6995504	Bco2	NM_133217	0.18365	0.00776882	22	4	3421.48	1	0.499811	20	6	915.562	1	0.104334	30	10	3556.32
6998584	Abhd14a	NM_001110271	0.18365	0.00776882	24	21	314.168	1	1	28.4	16.33	97.2127	1	1	28.4	11.485	54.9981
6998706	Wdr6	NM_031392	0.18365	0.00776882	23	8.5	396.652	0.0630733	0.000419011	26	5	394.848	1	0.021342	24	20	7.00036
7011928	Zfp275	NM_031494	0.18365	0.00776882	24	13	112.996	1	0.345572	12	9	84.4993	1	1	28.4	15.69	28.1202
6753083	Slc41a1	NM_173865	0.210522	0.00892364	24	9	149.482	1	1	28.4	13.335	26.5144	1	1	28.4	9.065	24.1908
6779185	Spred2	BC040462	0.210522	0.00892364	26	3	147.22	1	0.846691	20	7.5	145.699	1	1	28.4	10.795	64.1919
4461786	---	---	0.22374	0.0100785	28	14	97.2272	1	1	28.4	11.645	32.3965	1	1	28.4	13.075	45.2216
4487746	---	---	0.22374	0.0100785	24	13.5	5737.25	1	0.15798	12	9	1267.63	1	1	28.4	16.485	1009.82
4581670	---	---	0.22374	0.0100785	26	4	0	1	0.345572	40	35.5	585.272	1	0.0343495	28	13	756.675
4654658	---	---	0.22374	0.0100785	30	29	55.6493	1	1	28.4	10.745	14.7004	1	1	28.4	11.45	11.1235
4747994	---	---	0.22374	0.0100785	24	14	2132.07	1	1	28.4	12.21	1102.68	1	1	28.4	15.98	1051.22
4892753	---	---	0.22374	0.0100785	22	15	28855.3	1	1	28.4	12.745	1470.58	1	0.499811	25.3333	12	4723.52
6755569	Kif26b	NM_177757	0.22374	0.0100785	24	10	50.2046	1	1	28.4	10.54	6.18542	1	1	28.4	10.46	8.62812
6758984	Trak2	NM_172406	0.22374	0.0100785	24	12	291.611	1	1	28.4	14.61	121.32	1	1	28.4	15.98	58.2822
6762106	Pfkfb2	NM_008825	0.22374	0.0100785	24	13	983.939	0.0510579	0.000301988	24	12.5	986.131	1	1	28.4	14.78	272.463
6762355	Tmem183a	NM_020588	0.22374	0.0100785	22	14	9441.86	1	0.846691	34	1.5	3474.48	1	1	28.4	15.985	1163.34
6768123	P4ha1	NM_011030	0.22374	0.0100785	22	19	2552.51	0.420845	0.0167025	24	13	2273.91	1	0.104334	30	27	2383.23
6782643	Phf12	NM_174852	0.22374	0.0100785	24	7	475.741	1	1	28.4	11.95	123.69	1	1	28.4	9.685	125.529
6783784	Phospho1	NM_153104	0.22374	0.0100785	24	4	382.191	1	0.128645	22	3	115.683	1	1	28.4	10.495	69.7412
6784039	Psmd3	NM_009439	0.22374	0.0100785	24	7	487.126	0.540748	0.0271394	16	7	8.55599	1	1	28.4	9.285	1024.83
6785446	Slc25a10	NM_013770	0.22374	0.0100785	26	10	6846.84	1	0.193236	24	11	3440.92	1	1	28.4	12.935	628.82
6786473	Slc1a4	NM_018861	0.22374	0.0100785	26	25	299.248	1	1	28.4	16.895	57.0557	1	0.345572	12	1	405.95
6789229	Ndel1	NM_023668	0.22374	0.0100785	24	13	1174.93	1	1	28.4	11.66	142.218	1	1	28.4	14.4	192.22
6791558	Ubtf	NM_011551	0.22374	0.0100785	24	5	803.98	1	0.499811	20	6	205.415	1	1	28.4	10.21	177.898
6792031	Prkca	NM_011101	0.22374	0.0100785	24	5.5	339.058	1	1	28.4	12.91	138.585	1	0.193236	12	2	261.205
6792638	Cyth1	NM_011180	0.22374	0.0100785	26	10	1304.12	1	0.345572	22	12	1598.2	1	1	28.4	10.82	206.27
6812263	Peci	NM_011868	0.22374	0.0100785	24	12	7816.85	1	0.499811	23	8.5	2819.09	1	0.0343495	24	20	3458.67
6817956	Nek4	NM_011849	0.22374	0.0100785	22	3	267.074	1	1	28.4	11.465	18.0319	1	1	28.4	10.17	42.2807
6822459	Pdhb	NM_024221	0.22374	0.0100785	24	12.5	591	1	1	28.4	11.785	191.684	1	0.712712	35	14.5	608.465
6826285	Lect1	NM_010701	0.22374	0.0100785	22	15	38.2545	1	0.285775	18	8.5	11.9855	1	0.846691	27	3.5	14.531
6830480	Mal2	NM_178920	0.22374	0.0100785	26	20	10194.6	0.0990341	0.00107387	26	13	13564.4	1	1	28.4	14.955	4918.58
6832294	Pnpla3	NM_054088	0.22374	0.0100785	22	19	2010.73	1	1	28.4	14.735	153.001	1	1	28.4	16.05	43.8926
6832530	Creld2	NM_029720	0.22374	0.0100785	12	3	8162.77	0.0036759	1.26038e-06	24	13	5815.95	1	1	28.4	16.13	1436.49
6843653	Coro7	NM_030205	0.22374	0.0100785	22	9	417.971	1	0.416347	26	7	270.68	1	1	28.4	10.795	92.5727
6849325	Spsb3	NM_027141	0.22374	0.0100785	24	23	448.871	1	0.846691	24.6667	15	396.003	1	1	28.4	11.9	314.077
6855144	2610110G12Rik	BC028847	0.22374	0.0100785	26	24.5	688.722	1	0.416347	20	6	381.413	1	0.0343495	30	7	356.382
6871297	Nat11	BC020020	0.22374	0.0100785	20	9.5	231.896	1	0.416347	18	13	32.8805	1	1	28.4	12.045	22.8427
6876175	Pomt1	NM_145145	0.22374	0.0100785	26	24.5	626.072	1	1	28.4	11.04	47.9132	1	1	28.4	9.915	250.913
6882510	Itch	NM_008395	0.22374	0.0100785	26	13	2365.2	1	1	28.4	11.81	683.414	1	1	28.4	12.545	124.739
6882730	Lbp	NM_008489	0.22374	0.0100785	34	31	15021.9	1	0.597883	40	37	4476.27	1	1	28.4	13.27	2145.09
6890448	Gatm	NM_025961	0.22374	0.0100785	24	0.5	700.106	1	1	28.4	13.695	110.571	1	1	28.4	13.905	28.0683
6901335	Casp6	NM_009811	0.22374	0.0100785	22	8	2017.09	0.0732044	0.000577302	24	6	2476.71	0.155657	0.000153442	28.6667	16	2286.5
6913390	Zfp189	NM_145547	0.22374	0.0100785	24	14.5	50.947	1	1	28.4	12.035	73.7894	1	1	28.4	14.16	70.9136
6924871	Atp6v0b	NM_033617	0.22374	0.0100785	26	14	7948.59	0.15381	0.00259733	28	10.5	7112.57	1	1	28.4	17.2	3853.64
6925519	Tlr12	NM_205823	0.22374	0.0100785	12	9.5	401.707	1	0.128645	18	7	157.473	1	0.548847	30	15	135.057
6929297	Centg3	NM_139153	0.22374	0.0100785	24	12	323.219	1	1	28.4	12.665	110.638	1	1	28.4	11.495	95.8656
6931227	9130005N14Rik	NM_026667	0.22374	0.0100785	24	4.5	896.965	1	0.499811	20	7	279.166	1	0.345572	30	13	463.367
6933675	Pxn	NM_011223	0.22374	0.0100785	22	6	1616.38	1	1	28.4	11.95	487.267	1	1	28.4	9.98	434.913
6942553	Gnb2	NM_010312	0.22374	0.0100785	22	8	1394.2	1	0.193236	21	5.5	947.983	1	0.067776	20	18	680.661
6942751	Gna12	NM_010302	0.22374	0.0100785	26	10	3542.53	1	1	28.4	11.195	752.702	1	1	28.4	13.76	238.902
6953804	A030007L17Rik	BC080818	0.22374	0.0100785	24	23	896.753	1	1	28.4	12.58	67.6196	1	1	28.4	11.54	173.986
6953810	Inmt	NM_009349	0.22374	0.0100785	24	18	118344	1	0.846691	12	6	62387.2	1	1	28.4	16.255	19999.4
6954553	Thnsl2	NM_178413	0.22374	0.0100785	24	7	981.111	1	0.15798	24	9	476.166	1	0.597883	36	14.5	716.794
6961261	Ttc23	NM_025905	0.22374	0.0100785	26	14	1690.55	1	1	28.4	18.615	214.295	1	1	28.4	12.73	210.886
6963047	Stim1	NM_009287	0.22374	0.0100785	24	9	977.434	1	0.285775	28	9	336.441	1	1	28.4	9.55	180.2
6964199	Sbk1	NM_145587	0.22374	0.0100785	24	13	228.395	1	0.235442	24	12	61.4476	1	1	28.4	15.6	19.1442
6964374	Fus	NM_139149	0.22374	0.0100785	22	8	824.274	0.15381	0.00259733	24	3	1138.51	1	0.054277	28	14	1123.1
6965743	Foxa3	NM_008260	0.22374	0.0100785	26	11	1077.84	0.474693	0.021342	26	10	1329.01	1	1	28.4	16.26	297.75
6970053	Trim12	NM_023835	0.22374	0.0100785	24	3.5	1025.02	1	0.235442	20	5	255.407	1	0.193236	28	11	515.976
6973689	Stxbp2	NM_011503	0.22374	0.0100785	24	7	547.23	0.211129	0.00454255	25	6.5	769.438	1	0.499811	30	16	574.1
6981604	Rbpms	NM_019733	0.22374	0.0100785	24	2	1978.98	0.0510579	0.000301988	22	3	1487.82	1	0.285775	30	10	1051.89
6983145	Gatad2a	NM_145596	0.22374	0.0100785	22	9	1050.48	1	1	28.4	11.815	344.971	1	1	28.4	13.17	481.737
6983255	Abhd8	NM_022419	0.22374	0.0100785	26	19	126.006	1	0.235442	14	11	174.726	1	0.0343495	28	2	114.481
6989423	Edc3	NM_153799	0.22374	0.0100785	24	11	593.616	1	1	28.4	9.895	199.509	1	1	28.4	10.47	92.4341
6989933	Spg21	NM_138584	0.22374	0.0100785	24	6	1173.66	0.13439	0.00194684	24	3.5	1386.42	1	1	28.4	12.515	658.337
6993055	Snrk	NM_133741	0.22374	0.0100785	27.3333	14.6667	2422.55	1	0.345572	24	15	1044.33	1	1	28.4	14.54	3.63418
6998595	Rad54l2	NM_030730	0.22374	0.0100785	24	13	689.783	1	1	28.4	10.795	158.601	1	1	28.4	12.805	76.0511
7015697	Med14	NM_012005	0.22374	0.0100785	24	14	642.477	0.763806	0.054277	24	12.5	173.312	1	1	28.4	15.615	111.931
5613500	---	---	0.255277	0.0115428	14	2	17.3948	1	1	28.4	13.235	2.68488	1	1	28.4	13.925	3.33648
6883607	2410001C21Rik	BC049072	0.255277	0.0115428	21	5	866.771	1	0.285775	20	7	270.893	1	1	28.4	10.715	155.339
6958993	Eml2	BC055476	0.255277	0.0115428	24	5.5	267.498	0.839358	0.067776	28	1	145.664	1	1	28.4	11.14	74.7334
6971415	Pycard	NM_023258	0.255277	0.0115428	36	2	38.3252	1	1	28.4	17.255	4.94621	1	1	28.4	16.04	4.13551
4486443	---	---	0.268808	0.0130072	16	6	64.6296	1	1	28.4	9.205	81.2056	1	1	28.4	9.575	21.9652
4514404	---	---	0.268808	0.0130072	28	23	27.7186	1	1	28.4	12.33	6.04718	1	1	28.4	10.46	28.9783
4608937	---	---	0.268808	0.0130072	20	10	503.955	1	1	28.4	14.06	130.387	1	1	28.4	16.145	130.303
4848921	---	---	0.268808	0.0130072	30	26	1984.07	1	1	28.4	14.74	185.991	1	1	28.4	11.32	973.983
5026720	---	---	0.268808	0.0130072	22	16	15175.8	1	1	28.4	12.58	1292.83	1	1	28.4	16.775	1810.12
5110815	---	---	0.268808	0.0130072	10	0	220.122	1	1	28.4	13.165	35.8998	1	1	28.4	15.795	28.0287
5393721	---	---	0.268808	0.0130072	28	14	4537.43	1	0.416347	24	11	6235.55	1	1	28.4	12.755	526.605
5513086	---	---	0.268808	0.0130072	16	2	266.862	1	1	28.4	11.505	27.0101	1	1	28.4	11.815	57.0257
5560099	---	---	0.268808	0.0130072	28	1	9339.61	1	1	28.4	18.16	3832.79	1	1	28.4	14.26	0
6753058	2700049P18Rik	BC090647	0.268808	0.0130072	20	14	12.5865	1	1	28.4	11.65	2.93273	1	1	28.4	10.875	9.43139
6758588	Obfc2a	NM_028696	0.268808	0.0130072	22	15	578.201	0.474693	0.021342	22	12	589.091	1	1	28.4	13.055	140.271
6764580	Psen2	NM_001128605	0.268808	0.0130072	24	0	3679.01	1	1	28.4	12.895	531.545	1	1	28.4	10.285	381.785
6766595	Stx7	NM_016797	0.268808	0.0130072	28	23	791.818	1	1	28.4	15.18	100.828	1	0.712712	12	1	513.996
6767387	Cd164	NM_016898	0.268808	0.0130072	24	4	21069.2	1	1	28.4	11.305	2076.18	1	1	28.4	11.07	3197.39
6768145	Dnajb12	NM_019965	0.268808	0.0130072	22	9	1068.01	1	1	28.4	14.215	103.236	1	1	28.4	9.24	168.853
6769593	Pah	NM_008777	0.268808	0.0130072	23	14	39285	1	0.104334	18	11	22711.8	1	1	28.4	9.76	9266.2
6771050	Mdm1	NM_148922	0.268808	0.0130072	32	27	35.4968	1	0.104334	34	24.5	18.3494	1	1	28.4	9.71	12.5632
6780940	9530068E07Rik	BC034829	0.268808	0.0130072	20	9.5	2757.96	0.420845	0.0167025	24	4	6321.04	1	0.846691	32	16	4243.98
6783327	Mtmr4	NM_133215	0.268808	0.0130072	24	23	2515.82	0.24129	0.00595676	26	13	1844.35	1	1	28.4	14.415	1298.25
6783359	Sfrs1	NM_001078167	0.268808	0.0130072	20	1	2077.13	0.679025	0.0432758	32	17	1931.96	1	0.0167025	12	1	961.524
6784239	Coasy	NM_027896	0.268808	0.0130072	22	11	2737.35	1	0.597883	40	35.5	1037.61	1	1	28.4	9.74	497.119
6785440	Hgs	NM_008244	0.268808	0.0130072	24	6	504.45	1	1	28.4	11.37	82.7255	1	1	28.4	10.11	245.605
6785450	Gcgr	NM_008101	0.268808	0.0130072	24	7	2833.16	1	1	28.4	10.64	1879.12	1	1	28.4	10.16	2369.96
6790027	Wsb1	NM_019653	0.268808	0.0130072	26	23.5	2937.57	1	0.416347	16	11	1921.07	1	1	28.4	15.6	0
6792516	Prpsap1	BC029621	0.268808	0.0130072	22	10	1559.17	1	1	28.4	13.895	300.877	1	0.345572	20	1	408.637
6796525	Wdr21	NM_030246	0.268808	0.0130072	28	4	92.631	1	1	28.4	15.315	6.44917	1	0.128645	30	14	169.423
6802262	Dpf3	NM_058212	0.268808	0.0130072	24	19	31.4663	1	1	28.4	12.78	11.2207	1	1	28.4	9.12	32.4113
6803172	Itpk1	NM_172584	0.268808	0.0130072	26	25	498.864	1	1	28.4	14.83	44.2776	1	1	28.4	9.955	268.612
6807328	Fbxl21	NM_178674	0.268808	0.0130072	26	3	46.0327	1	1	28.4	12.435	12.5356	1	0.15798	26	14	50.5581
6824838	Tgm1	NM_019984	0.268808	0.0130072	24	15	1397.81	1	0.499811	24	15	836.154	1	0.846691	32	29	193.747
6829283	Zfp622	NM_144523	0.268808	0.0130072	22	3	192.899	1	1	28.4	15.77	53.1801	1	1	28.4	11.195	31.8665
6829360	Ank	NM_020332	0.268808	0.0130072	24	12.5	1123.17	1	1	28.4	12.09	167.278	1	1	28.4	16.905	91.1075
6832387	Ppara	NM_011144	0.268808	0.0130072	24	11.5	11192.4	1	0.597883	30	4.33333	4719.87	1	1	28.4	16.19	2174.35
6837772	Ttll8	NM_172818	0.268808	0.0130072	24	17	11.8087	1	1	28.4	16.11	3.13814	1	1	28.4	17.53	4.38123
6837818	Cpt1b	NM_009948	0.268808	0.0130072	24	22.5	89.4137	1	1	28.4	10.955	3.29017	1	1	28.4	10.125	12.8358
6839703	Ppm1f	NM_176833	0.268808	0.0130072	23	2	70.4632	1	1	28.4	13.925	53.3767	1	1	28.4	12.05	42.5392
6844480	Clcn2	NM_009900	0.268808	0.0130072	24	14	1011.09	1	0.499811	22	12	920.441	1	1	28.4	10.215	170.9
6853899	Thbs2	NM_011581	0.268808	0.0130072	24	2	49.9924	1	1	28.4	12.91	0.878227	1	1	28.4	13.705	57.8166
6854907	BC066107	NM_207245	0.268808	0.0130072	22	21	304.339	1	1	28.4	12.64	23.0722	1	1	28.4	12.625	50.9032
6856201	S3-12	NM_020568	0.268808	0.0130072	26	15	211.213	0.24129	0.00595676	22	13	231.931	0.924807	0.00776882	26	0	122.895
6868048	Ddb1	NM_015735	0.268808	0.0130072	22	12	1743.8	0.946178	0.0842688	22	11	3395.95	1	1	28.4	12.23	1115.43
6869795	Pi4k2a	NM_145501	0.268808	0.0130072	25	1	3442.3	1	1	28.4	15.21	188.081	1	0.846691	12	2	0
6870063	Nfkb2	NM_019408	0.268808	0.0130072	24	2	80.3273	1	1	28.4	14.855	25.9749	1	1	28.4	11.035	34.9873
6870104	As3mt	NM_020577	0.268808	0.0130072	24	20	2125.21	0.839358	0.067776	24	18	2784.87	1	1	28.4	13.99	277.538
6881438	Plcb1	NM_019677	0.268808	0.0130072	24	14	285.247	1	0.15798	26	14	204.707	1	1	28.4	12.23	135.241
6885195	Arhgap21	NM_001128084	0.268808	0.0130072	24	12	731.078	1	1	28.4	9.83	155.228	1	1	28.4	11.225	83.3969
6889301	Nat10	NM_153126	0.268808	0.0130072	24	22	877.237	1	1	28.4	12.88	137.656	1	1	28.4	9.7	301.038
6890127	Bmf	NM_138313	0.268808	0.0130072	24	11.5	268.913	1	1	28.4	12.83	112.059	1	1	28.4	9.55	79.266
6890838	Il1b	NM_008361	0.268808	0.0130072	22	0	95.0352	1	0.712712	27	19	33.729	1	1	28.4	13.595	65.9681
6906821	Efna1	NM_010107	0.268808	0.0130072	28	26	2719.82	0.182667	0.00344478	20	3	2692.03	1	0.128645	28	11	0
6912820	Aco1	NM_007386	0.268808	0.0130072	26	18	21721.8	1	1	28.4	17.125	1368.64	1	1	28.4	9.835	2440.84
6919741	Tmem67	NM_177861	0.268808	0.0130072	24	12.5	142.553	1	1	28.4	11.075	12.7011	1	1	28.4	10.435	28.3048
6919927	Decr1	NM_026172	0.268808	0.0130072	30	15	6193.41	1	1	28.4	13.175	68.7103	1	1	28.4	17.62	975.145
6926272	Cda	NM_028176	0.268808	0.0130072	24	21	1152.73	0.839358	0.067776	20	3	1237.3	1	1	28.4	10.98	91.3352
6931682	Rasl11b	NM_026878	0.268808	0.0130072	22	2	289.136	1	1	28.4	11.095	111.899	1	1	28.4	10.545	57.7777
6934323	Atp6v0a2	NM_011596	0.268808	0.0130072	26	13	1633.28	0.325243	0.0100785	24	13	839.831	1	1	28.4	15.11	169.13
6934506	Glt1d1	NM_177005	0.268808	0.0130072	24	13	772.938	1	1	28.4	14.585	461.578	1	0.499811	14	1	2189.49
6942716	Snx8	NM_172277	0.268808	0.0130072	26	16	319.824	0.946178	0.0842688	14	11	423.628	1	1	28.4	13.27	105.978
6945335	Cald1	NM_145575	0.268808	0.0130072	22	4	3242.23	1	1	28.4	12.105	464.939	1	0.499811	12	1	598.283
6959597	U2af1l4	NM_170760	0.268808	0.0130072	28	1	419.102	1	1	28.4	13.67	65.6177	1	1	28.4	9.305	184.675
6964177	D430042O09Rik	NM_001081022	0.268808	0.0130072	25	3.5	157.791	1	0.345572	22	5	110.45	1	0.193236	27	12	152.169
6971261	Spns1	NM_023712	0.268808	0.0130072	21	7.5	581.171	1	1	28.4	11.32	292.812	1	0.846691	20	18	152.311
6972242	Tollip	NM_023764	0.268808	0.0130072	24	13	3866.25	1	0.193236	26	10	1945.32	1	1	28.4	12.45	157.95
6973685	Mcoln1	NM_053177	0.268808	0.0130072	22	15	1986.97	0.36786	0.0130072	26	9.5	1569.56	1	1	28.4	12.96	78.562
6974003	Col4a2	NM_009932	0.268808	0.0130072	24	6	266.862	1	1	28.4	11.55	129.13	1	1	28.4	11.58	26.1881
6977787	Fbxw9	NM_026791	0.268808	0.0130072	24	15.5	274.287	1	0.104334	24	11	518.168	1	0.15798	22	1	793.939
6979023	Zfhx3	NM_007496	0.268808	0.0130072	24	7	152.452	1	1	28.4	9.405	116.156	1	0.712712	36	4	202.94
6989360	Ptpn9	NM_019651	0.268808	0.0130072	24	0	616.173	1	1	28.4	16.57	120.474	1	1	28.4	9.86	184.511
6997712	Morf4l1	NM_001039147	0.268808	0.0130072	22	10	1543.19	0.279725	0.00776882	24	5.5	1563.13	1	0.054277	24	20	945.826
6999154	Cmtm8	NM_027294	0.268808	0.0130072	22	8	2885.49	0.540748	0.0271394	24	3	2784.16	1	1	28.4	10.76	541.532
7005797	Hmgcs1	NM_145942	0.268808	0.0130072	24	3	44646.2	1	1	28.4	12.865	17307.2	1	0.846691	22	18	33287.5
7013998	Ngfrap1	NM_009750	0.268808	0.0130072	30	28	42.1436	1	0.315673	26	5	75.024	1	1	28.4	11.875	17.6816
7016693	Zdhhc9	NM_172465	0.268808	0.0130072	24	10	2008.11	1	1	28.4	11.55	809.703	1	1	28.4	13.55	772.631
7020286	Mageh1	NM_023788	0.268808	0.0130072	24	0	95.6008	1	1	28.4	10.58	25.7079	1	1	28.4	14.565	14.8779
4638862	---	---	0.306448	0.0148548	40	8	1.27279	1	0.104334	14	5	0.777817	1	0.345572	10	0	0.212132
6799462	Id2	NM_010496	0.306448	0.0148548	22	2	36434.5	0.36786	0.0130072	20	3	26849.2	1	0.0432758	28	7	15687.9
4544115	---	---	0.316574	0.0167025	24	16	6255.49	0.420845	0.0167025	26	12	2265.08	1	1	28.4	16.5	1018.74
4863578	---	---	0.316574	0.0167025	14	13	202.586	1	1	28.4	9.955	36.97	1	1	28.4	11.925	41.894
5062420	---	---	0.316574	0.0167025	10	0	147.007	1	1	28.4	16.125	28.0792	1	1	28.4	15.295	19.1683
5092102	---	---	0.316574	0.0167025	22	2	739.563	1	1	28.4	12.625	297.798	1	1	28.4	10.55	203.171
5348938	---	---	0.316574	0.0167025	24	13	506.854	1	0.285775	16	7	331.35	1	1	28.4	10.315	45.6321
5379381	---	---	0.316574	0.0167025	40	7	135.128	1	1	28.4	9.895	63.0676	1	1	28.4	16.975	18.1118
5396595	---	---	0.316574	0.0167025	24	12	392.727	0.36786	0.0130072	12	6	301.793	1	1	28.4	15.99	89.2026
5411378	---	---	0.316574	0.0167025	28	26	6.57609	1	1	28.4	16.69	1.78297	1	1	28.4	14.265	0.214253
5435804	---	---	0.316574	0.0167025	24	22	72.4784	1	1	28.4	15.55	8.52276	1	1	28.4	11.37	32.9112
5444311	---	---	0.316574	0.0167025	16	3	256.185	1	1	28.4	16.25	39.4173	1	1	28.4	10.62	4.81646
5556613	---	---	0.316574	0.0167025	12	10	130.32	1	1	28.4	12.065	24.6844	1	1	28.4	13.585	7.93374
6756386	Lpgat1	NM_172266	0.316574	0.0167025	22	17	13528.9	0.946178	0.0842688	28	18.5	3281.19	1	1	28.4	14.74	7.34224
6762017	Mcm6	NM_008567	0.316574	0.0167025	24	20.5	490.131	1	1	28.4	10.785	58.2872	1	1	28.4	9.58	60.9823
6766584	Taar4	NM_001008499	0.316574	0.0167025	10	9	10.6066	1	1	28.4	18.31	0.799031	1	0.924583	10	9	8.34386
6766772	Arhgap18	NM_176837	0.316574	0.0167025	24	3	883.389	1	0.128645	20	6	268.276	1	0.345572	26	13	325.481
6769235	Csnk1g2	NM_134002	0.316574	0.0167025	22	9	1767.41	1	0.712712	28.5	4.75	865.322	1	1	28.4	12.2	403.735
6771641	Stat2	NM_019963	0.316574	0.0167025	26	23	2122.24	1	0.345572	24.6667	16	1240.38	1	0.285775	28	4	1240.19
6775250	Agpat3	NM_053014	0.316574	0.0167025	22	8	3022.32	1	1	28.4	12.215	675.009	1	1	28.4	10.405	1914.36
6775411	Lmnb2	NM_010722	0.316574	0.0167025	24	16	69.7207	0.0376854	0.000153442	26	12	119.077	1	1	28.4	16.695	19.7806
6777784	Slc16a7	NM_011391	0.316574	0.0167025	26	13	16598.9	1	1	28.4	10.17	3691.79	1	1	28.4	15.205	639.524
6777879	Xrcc6bp1	NM_026858	0.316574	0.0167025	24	14	114.976	1	1	28.4	10.91	47.81	1	1	28.4	13.84	0
6777919	Pip4k2c	NM_054097	0.316574	0.0167025	24	7	296.278	1	1	28.4	14.97	234.35	1	1	28.4	9.96	85.0529
6781240	Larp1	BC053449	0.316574	0.0167025	26	25	4992.6	1	1	28.4	11.995	803.971	0.924807	0.00776882	30	3	4517.07
6781969	1500010J02Rik	NM_026889	0.316574	0.0167025	24	5	363.594	1	0.235442	25.2	3.8	536.312	1	0.235442	28	12.6667	335.31
6782096	Asgr1	NM_009714	0.316574	0.0167025	30	14	3484.76	1	1	28.4	14.925	1462.36	1	0.416347	20	4	12355.8
6783176	Ppm1d	NM_016910	0.316574	0.0167025	34	8	49.5682	1	1	28.4	11.455	69.644	1	1	28.4	10.155	22.8997
6784940	Sox9	NM_011448	0.316574	0.0167025	24	0	402.414	1	1	28.4	16.565	145.086	1	1	28.4	14.505	133.004
6785259	Sec14l1	NM_028777	0.316574	0.0167025	22	18	316.006	0.763806	0.054277	26	13	231.577	1	1	28.4	14.43	50.7123
6787947	Btnl9	NM_172793	0.316574	0.0167025	27	17.5	209.975	1	1	28.4	12.38	12.0314	1	0.15798	27	6	150.614
6788701	Flcn	NM_146018	0.316574	0.0167025	24	8	1541.85	1	0.499811	24	5	846.76	1	0.499811	40	12	653.013
6796196	Plekhg3	NM_153804	0.316574	0.0167025	24	11.5	974.11	1	1	28.4	9.625	316.082	1	1	28.4	11.14	67.185
6799224	Pqlc3	NM_172574	0.316574	0.0167025	24	18.5	38.3959	1	1	28.4	10.86	9.30234	1	1	28.4	12.005	11.9522
6803088	BC002230	BC025577	0.316574	0.0167025	24	2	294.439	1	0.416347	20	5	0	1	1	28.4	9.77	95.8275
6810548	Emb	NM_010330	0.316574	0.0167025	25	1	12.7279	1	1	28.4	15.82	3.48321	1	0.067776	14	11	0
6812871	Dtnbp1	NM_025772	0.316574	0.0167025	22	10	1136.6	0.36786	0.0130072	24	6	806.667	1	1	28.4	11.35	84.0287
6813315	Thoc3	NM_028597	0.316574	0.0167025	22	11	1644.8	1	0.128645	26	9.5	1846.47	1	1	28.4	11.795	206.919
6817416	Vdac2	NM_011695	0.316574	0.0167025	26	13	2881.32	1	1	28.4	11.295	823.244	1	0.15798	30	16	1529.68
6818500	Mbl1	NM_010775	0.316574	0.0167025	26	23	7766.51	1	1	28.4	16.81	2418.2	1	1	28.4	12.525	5959.06
6823041	Camk2g	NM_178597	0.316574	0.0167025	24	5	264.387	0.15381	0.00259733	22	4	227.406	1	1	28.4	10.055	70.2125
6823721	Sh3bp5	NM_011894	0.316574	0.0167025	20	2	1318.33	1	1	28.4	9.575	247.014	1	0.345572	32	7	685.186
6824223	Fermt2	NM_146054	0.316574	0.0167025	24	1.5	9442.99	0.182667	0.00344478	22	2	12728.7	1	0.416347	30	10	5752.67
6827159	Ednrb	NM_007904	0.316574	0.0167025	30	19	324.774	1	1	28.4	13.145	0	1	1	28.4	16.235	53.686
6831858	H1f0	NM_008197	0.316574	0.0167025	22	4	10787.9	1	0.235442	24	21	3612.61	1	0.0432758	30	8	8146.53
6832343	3110048E14Rik	BC058794	0.316574	0.0167025	14	4	93.126	1	1	28.4	12.77	34.4824	1	0.0432758	34	11	114.834
6838394	Fkbp11	NM_024169	0.316574	0.0167025	22	12	388.697	1	0.315673	26	9	200.606	1	0.345572	28	22	220.759
6840565	Pcyt1a	NM_009981	0.316574	0.0167025	26	14	1783.25	1	1	28.4	12.3	155.531	1	1	28.4	13.5	323.086
6846571	BC043118	BC043118	0.316574	0.0167025	22	20	855.175	1	1	28.4	17.4	123.299	1	1	28.4	16.24	107.278
6849525	Anks1	NM_181413	0.316574	0.0167025	20	15	176.918	1	1	28.4	12.23	41.901	1	1	28.4	9.625	29.0575
6850066	Tnxb	NM_031176	0.316574	0.0167025	25	13.5	145.947	1	1	28.4	9.77	35.378	1	1	28.4	10.21	31.5412
6854371	Traf7	NM_153792	0.316574	0.0167025	24	3	124.592	1	1	28.4	11.74	0	1	1	28.4	9.425	79.5463
6856710	1110012J17Rik	NM_001114098	0.316574	0.0167025	16	11	38.608	1	0.193236	34	25	36.416	1	1	28.4	17.415	18.7701
6860068	Cxxc5	NM_133687	0.316574	0.0167025	24	4	1178.82	1	0.104334	20	6	1117.09	1	0.104334	26	10	1481.18
6861175	Prrc1	NM_028447	0.316574	0.0167025	22	9	1068.79	1	1	28.4	10.675	152.618	1	1	28.4	11.55	395.205
6867622	Acy3	NM_027857	0.316574	0.0167025	28	7	1318.9	1	0.597883	26	9	4212.16	0.842323	0.00595676	26	15	3078.81
6867780	Map3k11	NM_022012	0.316574	0.0167025	22	7	568.514	1	1	28.4	9.61	122.291	1	1	28.4	10.05	198.467
6867823	Syvn1	NM_028769	0.316574	0.0167025	12	3	7198.77	0.211129	0.00454255	24	13	2212.47	1	1	28.4	14.905	1036.59
6868066	Prpf19	NM_134129	0.316574	0.0167025	22	8	4840.57	1	0.345572	20	6.5	3454.43	1	1	28.4	13.55	731.914
6869015	Ppapdc2	NM_028922	0.316574	0.0167025	24	2	215.314	1	1	28.4	11.035	38.2813	1	1	28.4	9.84	144.521
6870102	2010012O05Rik	BC027506	0.316574	0.0167025	20	14	64.771	1	1	28.4	13.445	11.6057	1	1	28.4	11.96	5.41432
6872651	Sgms1	NM_144792	0.316574	0.0167025	22	10	1177.33	1	1	28.4	12.235	205.48	1	1	28.4	12.065	212.329
6875039	Il15ra	NM_008358	0.316574	0.0167025	24.6667	9	853.831	1	1	28.4	11.6	163.412	1	1	28.4	15.785	64.8463
6876089	Usp20	NM_028846	0.316574	0.0167025	22	10	115.683	1	1	28.4	15.6	11.1521	1	1	28.4	11.5	8.20244
6878548	Dusp19	NM_024438	0.316574	0.0167025	28	22	306.389	1	1	28.4	14.27	36.2481	1	1	28.4	10.885	11.9303
6880983	Stard7	NM_139308	0.316574	0.0167025	26	9	6022.07	0.474693	0.021342	22	6	5144.56	1	0.054277	30	15	4080.71
6881114	Ttl	NM_027192	0.316574	0.0167025	24	14	212.061	0.839358	0.067776	18	9.5	92.2421	1	1	28.4	15.655	15.159
6888891	Tspan18	NM_183180	0.316574	0.0167025	26	25	110.874	1	0.499811	18	6	112.925	1	1	28.4	9.875	14.2853
6892139	Trib3	NM_175093	0.316574	0.0167025	28	5	157.402	0.0350383	0.000108124	26	4	256.75	1	1	28.4	12.48	55.0949
6898940	Sh3d19	NM_001082414	0.316574	0.0167025	23	8.5	4036.24	0.24129	0.00595676	23	4.5	2323.41	1	1	28.4	10.59	1432.82
6899746	Hist2h2be	NM_178214	0.316574	0.0167025	24	22	171.332	1	0.285775	28	15	89.1662	1	1	28.4	11.915	36.655
6899805	Acp6	NM_019800	0.316574	0.0167025	24	4	1279.23	1	0.712712	20	8	1337.99	1	0.128645	32	14	1218.49
6911354	Chchd7	NM_181391	0.316574	0.0167025	26	14	2441.78	1	1	28.4	10.69	1161.41	1	1	28.4	11.8	431.149
6917249	Phc2	NM_018774	0.316574	0.0167025	24	5.5	144.674	1	1	28.4	11.22	27.2788	1	1	28.4	7.35	48.0062
6918151	Arhgef19	NM_172520	0.316574	0.0167025	26	23	974.181	1	0.712712	28.6667	18	1357.06	1	0.285775	32	4	1119
6924892	Cdc20	NM_023223	0.316574	0.0167025	22	2	48.154	1	0.712712	12	0	23.9709	1	0.712712	10	8	0
6926387	Arhgef10l	NM_172415	0.316574	0.0167025	24	4	808.577	0.36786	0.0130072	23	2.5	564.978	1	0.499811	32	7	288.782
6928740	Abcb1a	NM_011076	0.316574	0.0167025	26	13	1074.66	1	1	28.4	14.225	104.385	1	0.0943014	14	0	335.451
6929655	Khk	NM_008439	0.316574	0.0167025	23	20	25231.4	1	0.846691	24	14	9373.12	1	1	28.4	14.07	2415.03
6929817	Fgfr3	NM_008010	0.316574	0.0167025	28	8.5	410.758	1	1	28.4	12.2	200.863	1	1	28.4	8.415	224.645
6931375	Tmem33	NM_028975	0.316574	0.0167025	24	19.5	10238.1	0.182667	0.00344478	26	16	2033.36	1	0.128645	26	5	0
6931857	Polr2b	NM_153798	0.316574	0.0167025	23	17.5	3408.01	1	1	28.4	13.99	47.2195	1	0.846691	12	1	349.876
6933601	Ube3b	NM_054093	0.316574	0.0167025	22	10	638.942	1	1	28.4	11.02	276.257	1	1	28.4	10.6	298.335
6935463	Trrap	NM_001081362	0.316574	0.0167025	22	8	682.641	0.540748	0.0271394	24	4	336.866	1	1	28.4	11.035	182.262
6941374	Hspb8	NM_030704	0.316574	0.0167025	24	16	5966.07	0.13439	0.00194684	24	13	16353.3	1	0.345572	28	27	21183.7
6942474	Ywhag	NM_018871	0.316574	0.0167025	22	17	1752.63	1	0.285775	32	15.5	1900	1	0.193236	25	4.5	1436.42
6949076	Brpf1	NM_030178	0.316574	0.0167025	20	13.5	159.841	1	0.416347	20	10.5	124.451	1	1	28.4	15.965	49.9861
6952168	Ndufa5	NM_026614	0.316574	0.0167025	26	17	3009.66	1	1	28.4	13.135	420.777	1	1	28.4	13.695	133.312
6956592	Atp2b2	NM_009723	0.316574	0.0167025	26	22	428.79	1	0.499811	28	13	99.9849	1	0.104334	28	7	73.6098
6959192	Zfp526	NM_175436	0.316574	0.0167025	22	12	115.612	1	1	28.4	16.265	6.01253	1	1	28.4	12.785	2.03046
6963073	Olfr568	NM_147091	0.316574	0.0167025	22	7	82.5194	1	1	28.4	9.58	15.1639	1	1	28.4	9.9	9.99213
6963950	BC030336	BC030336	0.316574	0.0167025	24	13	1615.24	1	1	28.4	11.755	238.964	1	1	28.4	18.505	527.731
6964798	Ptpre	NM_011212	0.316574	0.0167025	24	4	45.6791	0.182667	0.00344478	24	3	23.2638	1	1	28.4	12.065	7.58867
6965130	Ric8	NM_053194	0.316574	0.0167025	24	10	243.386	1	0.15798	23	10.5	47.6944	1	1	28.4	12.89	14.6937
6966925	Scaf1	NM_001008422	0.316574	0.0167025	24	5	265.943	1	1	28.4	15.93	18.7125	1	0.15798	28	2.5	155.988
6978291	Mt1	NM_013602	0.316574	0.0167025	26	8	63223.1	0.474693	0.021342	24	6	53131.3	0.280617	0.000577302	27.3333	15.3333	76016.3
6984499	Kifc3	NM_010631	0.316574	0.0167025	24	22	308.016	1	1	28.4	12.47	0.321734	1	0.0271394	26	5	251.942
6987366	Atg4d	NM_153583	0.316574	0.0167025	24	12	930.128	1	0.345572	26	10.5	416.168	1	0.597883	24	1	909.905
6990543	Leo1	NM_001039522	0.316574	0.0167025	26	23	435.861	0.540748	0.0271394	28	19	120.208	1	0.285775	34	3	231.86
6993797	Tmed1	NM_010744	0.316574	0.0167025	28	10	168.291	1	1	28.4	11.91	38.2608	1	1	28.4	12.705	115.971
6995964	Pml	NM_178087	0.316574	0.0167025	25	3.5	730.512	1	0.235442	22	3	1171.32	1	0.499811	26	11	581.454
6999579	Ano10	NM_133979	0.316574	0.0167025	28	2	161.927	1	0.846691	34	1	590.081	1	0.846691	12	1	551.26
5434246	---	---	0.359374	0.0190223	12	11	6.71751	1	1	28.4	12.085	1.2392	1	1	28.4	14.44	0
6781257	Sh3bp5l	NM_024480	0.359374	0.0190223	24	8	141.846	1	1	28.4	12.65	38.4249	1	1	28.4	14.385	50.8742
6933474	Ttc28	BC046779	0.359374	0.0190223	16	13	16.3342	1	1	28.4	13.095	7.2581	1	1	28.4	12.05	4.09132
6957469	Tas2r130	NM_199156	0.359374	0.0190223	22	12	3.60624	1	1	28.4	10.65	1.68115	1	1	28.4	16.515	2.1694
4478708	---	---	0.376666	0.021342	14	1	6.36396	1	1	28.4	13.23	1.09637	1	1	28.4	10.82	0.236174
4639787	---	---	0.376666	0.021342	14	6	4900.96	1	1	28.4	12.075	1169.73	1	1	28.4	11.28	824.762
4956436	---	---	0.376666	0.021342	16	2	6.78823	1	1	28.4	11.585	0.41189	1	1	28.4	10.21	0.735745
4989471	---	---	0.376666	0.021342	22	18	492.146	1	1	28.4	13.545	428.884	1	0.597883	12	11	259.72
5557033	---	---	0.376666	0.021342	18	3	271.67	1	1	28.4	12.68	97.9106	1	0.712712	40	15	294.651
5586918	---	---	0.376666	0.021342	16	6	53.528	1	0.846691	26	25	56.71	1	1	28.4	9.285	21.2447
6748605	Hs6st1	NM_015818	0.376666	0.021342	26	10	4556.67	1	0.15798	22	12.5	3030.94	0.307197	0.00078998	24	2	1545.24
6749933	Adam23	NM_011780	0.376666	0.021342	23	19.5	107.834	1	1	28.4	15.62	342.957	1	1	28.4	14.625	119.042
6752988	AA986860	NM_177604	0.376666	0.021342	24	13	69.65	1	0.193236	22	11	64.3467	1	1	28.4	17	8.37108
6766258	Reps1	NM_009048	0.376666	0.021342	24	4	629.82	0.0376854	0.000153442	22	4	258.306	1	0.235442	30	12.5	438.83
6777351	Slc35e3	NM_029875	0.376666	0.021342	21	15	1745.35	0.15381	0.00259733	12	9	765.726	1	1	28.4	15.475	307.938
6778432	Rhbdd3	NM_177370	0.376666	0.021342	22	7	181.726	0.839358	0.067776	40	36	126.36	1	1	28.4	12.965	62.3636
6779818	Cpeb4	NM_026252	0.376666	0.021342	24	0	5429.52	0.211129	0.00454255	22	1	5333.99	1	1	28.4	12.725	0
6780995	Il5	NM_010558	0.376666	0.021342	18	11	7.35391	1	1	28.4	15.115	0.504167	1	1	28.4	16.655	3.31916
6781352	Jmjd4	NM_178659	0.376666	0.021342	24	12	463.721	1	1	28.4	12.18	117.878	1	1	28.4	9.455	96.5943
6781960	Slc25a35	NM_028048	0.376666	0.021342	12	5	35.7796	1	0.193236	28	14	50.4167	1	0.846691	28	10	55.6493
6782989	Slfn1	NM_011407	0.376666	0.021342	16	14	37.9009	1	1	28.4	13.12	32.9087	1	1	28.4	11.765	9.18355
6784466	Wnt3	NM_009521	0.376666	0.021342	30	10	31.2541	1	1	28.4	14.805	1.90671	1	1	28.4	14.59	12.9344
6785306	Afmid	NM_027827	0.376666	0.021342	24	18	6707.83	1	1	28.4	10.36	1473.46	1	1	28.4	15.165	1378.59
6788064	Zfp454	NM_172794	0.376666	0.021342	22	19	75.8018	1	1	28.4	12.8	5.28598	1	0.021342	31	2	45.8559
6788784	Flii	NM_022009	0.376666	0.021342	23.3333	8	1886.18	0.679025	0.0432758	20	8	1555.21	1	1	28.4	11.265	286.944
6789475	Dhx33	NM_178367	0.376666	0.021342	22	12	548.715	1	0.193236	22	11	272.236	1	1	28.4	15.84	129.284
6792496	Trim65	NM_178802	0.376666	0.021342	24	16	116.46	0.279725	0.00776882	26	13	213.829	1	0.0343495	28	0	285.954
6796492	Sipa1l1	NM_172579	0.376666	0.021342	24	3	872.57	1	1	28.4	12.355	201.132	1	1	28.4	9.875	172.765
6798269	2610204M08Rik	NM_198411	0.376666	0.021342	24	10	17.8191	1	1	28.4	14.83	55.7784	1	0.235442	40	3	275.56
6801729	Tmem30b	NM_178715	0.376666	0.021342	12	6	1386.35	1	1	28.4	9.035	612.119	1	1	28.4	13.3	468.084
6808230	Brd9	NM_001024508	0.376666	0.021342	25	4.5	125.865	0.540748	0.0271394	24	3	148.28	1	0.285775	30	13	155.988
6815248	Pde8b	NM_172263	0.376666	0.021342	24	15	13.8593	1	1	28.4	14.005	3.82545	1	0.416347	38	13	11.6673
6818498	Mat1a	NM_133653	0.376666	0.021342	27	14.5	28336.6	1	1	28.4	14.055	18657.7	1	1	28.4	12.07	9583.63
6820057	Bin3	NM_021328	0.376666	0.021342	24	4	89.2369	1	1	28.4	11.3	55.9601	1	1	28.4	9.61	68.065
6822216	B930095G15Rik	BC096543	0.376666	0.021342	26	5	303.49	1	1	28.4	10	125.717	1	1	28.4	10.54	52.9354
6831847	Gga1	NM_145929	0.376666	0.021342	22	8	195.515	1	1	28.4	10.515	121.176	1	0.499811	38	2	115.824
6833185	Gpd1	NM_010271	0.376666	0.021342	20	8	1957.13	0.0510579	0.000301988	22	12	21734.2	1	0.054277	24	1	4779.26
6834728	5730557B15Rik	NM_027496	0.376666	0.021342	26	15	631.658	1	1	28.4	12.445	49.67	1	1	28.4	13.09	77.6004
6836782	Pycrl	NM_025412	0.376666	0.021342	24	17	369.11	0.946178	0.0842688	26	13	1332.75	1	0.499811	28	0	1849.79
6837835	Rabl2a	NM_026817	0.376666	0.021342	22	3	61.1647	1	1	28.4	12.16	22.9403	1	1	28.4	10.515	7.16547
6840400	Hes1	NM_008235	0.376666	0.021342	22	5	683.277	1	1	28.4	13.78	99.2283	1	1	28.4	12.68	92.7717
6843943	Zc3h7a	NM_145931	0.376666	0.021342	12	2	650.609	1	1	28.4	11.49	99.7947	1	1	28.4	16.08	255.936
6847184	Hspa13	NM_030201	0.376666	0.021342	12	3	1580.6	0.679025	0.0432758	24	12.5	5799.44	1	0.712712	12	0	748.26
6848209	Ripk4	NM_023663	0.376666	0.021342	24	14	168.15	0.15381	0.00259733	26	12	262.266	1	0.128645	30	26	106.137
6849986	Daxx	NM_007829	0.376666	0.021342	24	5	169.493	1	0.846691	40	36	102.177	1	1	28.4	8.935	57.1533
6850729	Pex6	NM_145488	0.376666	0.021342	22	10	1120.34	1	1	28.4	9.925	296.226	1	1	28.4	9.72	488.884
6852695	Mta3	NM_054082	0.376666	0.021342	24	4	709.864	0.36786	0.0130072	22	5	500.844	1	0.054277	30	12.5	270.186
6854596	Tead3	NM_001098226	0.376666	0.021342	24	6	129.825	1	1	28.4	12.355	63.2426	1	1	28.4	11.965	33.5922
6855610	Hsp90ab1	NM_008302	0.376666	0.021342	22	20	52914.1	0.211129	0.00454255	29	17	37440.9	0.741167	0.00454255	28	2	26341.3
6860635	Eif1a	NM_010120	0.376666	0.021342	24	22.5	383.853	1	0.499811	24	10	416.203	1	0.846691	24	20.5	407.506
6865231	Fem1c	NM_173423	0.376666	0.021342	22	21	2228.31	1	0.345572	40	2	1787.21	1	1	28.4	15.235	377.774
6865238	Cdo1	NM_033037	0.376666	0.021342	26	5	23604.4	0.13439	0.00194684	24	7	43376.2	1	0.067776	24	21	8.23181e-11
6868649	5730446C15Rik	NM_146096	0.376666	0.021342	24	12	1036.48	1	0.846691	18	11	252.579	1	1	28.4	14.13	445.213
6870982	Rad9	NM_011237	0.376666	0.021342	22	0	234.901	1	1	28.4	13.545	27.5818	1	0.416347	34	2	203.717
6879006	Cugbp1	NM_017368	0.376666	0.021342	24	12	1635.75	1	0.193236	34	10.5	0	1	1	28.4	14.165	457.952
6885891	9430097D07Rik	ENSMUST00000100190	0.376666	0.021342	40	27.5	18.809	1	1	28.4	13.055	1.53407	1	1	28.4	13.43	6.9102
6887089	Rbms1	NM_020296	0.376666	0.021342	23	8.5	1018.2	0.279725	0.00776882	22	6	762.544	1	0.345572	34	13	436.002
6888483	Olfr1100	NM_146594	0.376666	0.021342	24	2	2.54558	1	1	28.4	10.35	0.464569	1	1	28.4	14.845	0.462094
6891865	Foxa2	NM_010446	0.376666	0.021342	24	20	877.944	0.182667	0.00344478	24	15	1304.82	1	0.054277	24	6	936.492
6896406	Pld1	NM_008875	0.376666	0.021342	24	1	609.95	0.839358	0.067776	22	2	404.607	1	0.499811	28	10	435.861
6897579	Smad9	NM_019483	0.376666	0.021342	24	12	553.735	1	0.128645	28	5	305.399	1	1	28.4	12.81	27.8688
6897908	P2ry1	NM_008772	0.376666	0.021342	24	14	538.179	0.420845	0.0167025	26	14	692.682	1	1	28.4	15.6	173.898
6901055	Sec24d	NM_027135	0.376666	0.021342	12	3	1647.28	0.325243	0.0100785	24	12	4286.69	1	1	28.4	16.055	1480.06
6907217	Vps45	NM_013841	0.376666	0.021342	26	23	166.029	1	1	28.4	12.54	69.9615	1	1	28.4	9.745	41.1939
6911682	Ccne2	NM_009830	0.376666	0.021342	22	17	57.2756	1	1	28.4	14.525	6.83949	1	1	28.4	14.915	3.36088
6922966	Bnc2	NM_172870	0.376666	0.021342	16	10	31.3955	1	1	28.4	15.69	6.78858	1	1	28.4	14.47	14.4791
6925518	Zscan20	NM_177758	0.376666	0.021342	24	21	149.553	1	1	28.4	13.28	10.4712	1	1	28.4	10.59	42.4964
6925958	Rps6ka1	NM_009097	0.376666	0.021342	24	8	363.806	1	0.597883	26	6	174.302	1	0.712712	32	18	166.594
6929152	Psmc2	NM_011188	0.376666	0.021342	24	3.5	1295.49	1	1	28.4	17.435	308.64	1	1	28.4	12.275	681.356
6935180	1110007L15Rik	BC019557	0.376666	0.021342	22	10	700.319	1	0.104334	26	8	187.313	1	0.0167025	23	11	602.207
6937482	D5Ertd579e	NM_001081232	0.376666	0.021342	22	15	970.08	1	0.345572	29.3333	13.6667	956.81	1	1	28.4	15.015	218.843
6940303	Rasgef1b	NM_145839	0.376666	0.021342	26	12	1118.36	1	1	28.4	10.135	346.466	1	1	28.4	12.745	142.615
6942587	Cyp3a13	NM_007819	0.376666	0.021342	23	19.5	11018.8	1	0.285775	32	21	5448.61	1	1	28.4	13.735	898.972
6945034	Ahcyl2	NM_021414	0.376666	0.021342	22	20	1976.5	0.540748	0.0271394	26	15	1907.49	1	0.846691	24	6	2101.24
6955879	Foxp1	NM_053202	0.376666	0.021342	24	4	1023.68	0.679025	0.0432758	20	5	354.614	1	0.054277	28	10	798.819
6964160	Il4ra	NM_001008700	0.376666	0.021342	22	1	409.203	1	0.235442	40	39	458.134	1	1	28.4	12.13	245.462
6968762	Idh2	NM_173011	0.376666	0.021342	30	15	3234.09	1	0.846691	16	6	1195.72	1	0.499811	18	2.5	5434.82
6969874	Art2a	NM_007490	0.376666	0.021342	36	20.5	1.90919	1	1	28.4	11.945	0.242538	1	1	28.4	12.25	0.947523
6970138	Trim3	NM_018880	0.376666	0.021342	24	10	183.211	1	1	28.4	12.115	31.5299	1	1	28.4	11.545	21.6223
6971412	Prss8	NM_133351	0.376666	0.021342	24	12	365.716	1	1	28.4	11.06	103.451	1	1	28.4	11.25	39.773
6974621	Slc20a2	NM_011394	0.376666	0.021342	22	8	4007.6	0.763806	0.054277	22	6	2602.65	1	0.712712	28	14	3924.65
6976902	Ints10	NM_027590	0.376666	0.021342	24	21	297.48	1	1	28.4	13.99	45.8909	1	1	28.4	11.205	188.57
6979515	Klhl36	ENSMUST00000034287	0.376666	0.021342	40	2	79.1252	1	1	28.4	12.535	16.8698	1	1	28.4	10.315	27.8922
6980526	Grtp1	NM_025768	0.376666	0.021342	22	6	540.583	1	1	28.4	12.28	126.483	1	1	28.4	10.565	175.471
6987866	Zbtb44	NM_001115130	0.376666	0.021342	14	7	3085.88	0.15381	0.00259733	24	23	2556.33	1	0.499811	10	2	2242.59
6988273	Olfr147	NM_146869	0.376666	0.021342	22	8	35.4968	1	1	28.4	14.985	9.63362	1	1	28.4	13.39	16.4137
6993000	Deb1	NM_026794	0.376666	0.021342	26	14	454.316	1	0.128645	26	11	1278.8	1	1	28.4	12.205	667.987
6998676	Tcta	NM_133986	0.376666	0.021342	24	22	1271.38	1	0.235442	28	13	238.436	1	1	28.4	10.81	329.55
6999447	Gorasp1	NM_028976	0.376666	0.021342	24	11.5	671.751	0.15381	0.00259733	22	12.5	1096.33	1	1	28.4	13.945	125.136
7015406	Magix	NM_018832	0.376666	0.021342	22	4	477.509	1	1	28.4	11.38	55.8356	1	1	28.4	10.495	163.24
7019746	Serpina7	NM_177920	0.376666	0.021342	24.6667	5	888.48	0.839358	0.067776	18	5	4484.19	1	1	28.4	12.52	3194.81
4460053	---	---	0.424932	0.0242407	32	8	42.9921	1	1	28.4	11.895	13.2409	1	0.597883	34	11	21.9203
5400186	---	---	0.424932	0.0242407	22	1	16.1927	1	1	28.4	11.315	10.6798	1	1	28.4	10.94	3.63135
6792419	Fdxr	NM_007997	0.424932	0.0242407	24	9.5	200.535	1	1	28.4	12.725	46.633	1	1	28.4	10.14	67.6029
6813536	Spock1	NM_009262	0.424932	0.0242407	16	10	6.57609	1	1	28.4	17.63	2.8956	1	1	28.4	15.175	2.02798
6813555	Ubqln1	NM_152234	0.424932	0.0242407	26	25	5886.1	0.0990341	0.00107387	26	17	3013.41	0.627918	0.00344478	28	4	5476.9
6873204	Hps1	NM_019424	0.424932	0.0242407	24	5.5	193.677	0.946178	0.0842688	33	0	60.8465	1	1	28.4	11.57	13.9654
6909509	Npnt	NM_033525	0.424932	0.0242407	22	3	36.416	1	1	28.4	17.02	9.13688	1	0.345572	32	8.5	5.72756
6970307	Olfr488	NM_146732	0.424932	0.0242407	22	10	9.33381	1	1	28.4	15.92	2.15455	1	0.260609	22	17	11.9501
6975632	Adam24	NM_010086	0.424932	0.0242407	12	0	4.03051	1	1	28.4	11.625	0.311481	1	1	28.4	11.22	0.486136
4306482	---	---	0.4453	0.0271394	10	2	2.33345	1	1	28.4	13.635	0.196929	1	0.0842688	20	19	1.27279
4423030	---	---	0.4453	0.0271394	14	13	1953.1	1	1	28.4	16.455	267.354	1	1	28.4	11.22	342.5
4792490	---	---	0.4453	0.0271394	28	10.5	210.364	1	0.712712	38	10	216.658	1	1	28.4	14.1	40.9065
4877689	---	---	0.4453	0.0271394	10	0	6.15183	1	1	28.4	16.3	2.26522	1	1	28.4	9.24	1.61185
4882632	---	---	0.4453	0.0271394	18	12	124.946	1	1	28.4	13.315	24.4259	1	1	28.4	10.69	26.1799
4958035	---	---	0.4453	0.0271394	22	10	1466.82	1	1	28.4	10.795	319.374	1	1	28.4	10.705	289.893
4976152	---	---	0.4453	0.0271394	24	6	5863.9	1	0.846691	22	5	3567.99	1	0.597883	30	13	2381.32
5016542	---	---	0.4453	0.0271394	22	10	18379.8	1	0.597883	14	5	14819.9	1	0.712712	32	14	4049.11
5224901	---	---	0.4453	0.0271394	22	1	173.665	1	0.499811	24	21	0.989949	1	0.846691	22	4	251.801
5355295	---	---	0.4453	0.0271394	28	27	197.636	1	0.846691	38	27	107.692	1	1	28.4	13.25	37.9076
6750589	BC038286	NM_170755	0.4453	0.0271394	22	10	3636.79	1	1	28.4	10.89	953.387	1	0.846691	38	4	3214.3
6750595	Zfand2b	NM_026846	0.4453	0.0271394	24	11	238.719	1	1	28.4	13.25	124.077	1	0.285775	20	2	59.6091
6750642	Stk11ip	NM_027886	0.4453	0.0271394	22	7	108.894	1	0.499811	22	5	93.9745	1	1	28.4	9.92	19.5183
6753108	Klhdc8a	NM_144810	0.4453	0.0271394	28	14	75.4836	1	0.712712	14	4	82.4487	1	1	28.4	11.02	5.95631
6762773	Trove2	NM_013835	0.4453	0.0271394	20	3	232.78	1	1	28.4	12.19	38.6048	1	1	28.4	9.885	66.5893
6765218	Atf3	NM_007498	0.4453	0.0271394	22	18	159.382	1	1	28.4	12.035	12.1226	1	1	28.4	14.485	34.7564
6766835	Ptprk	NM_008983	0.4453	0.0271394	24	4	3802.96	0.13439	0.00194684	20	6	2271.51	1	0.597883	26	14	819.395
6767235	Tube1	NM_028006	0.4453	0.0271394	26	1	63.2861	0.24129	0.00595676	22	4	31.7491	0.842323	0.00595676	27	12	47.1994
6768933	Ftcd	NM_080845	0.4453	0.0271394	24	8	6679.19	0.606236	0.0343495	26	9	7903.69	1	1	28.4	10.81	3038.22
6770030	Btg1	NM_007569	0.4453	0.0271394	24	23	12687.2	1	0.235442	20	2	7661.78	1	0.597883	38	37	4839.37
6774719	Arid5b	NM_023598	0.4453	0.0271394	24	13.5	847.68	1	1	28.4	12.735	487.872	1	1	28.4	16.005	525.837
6775147	Cabin1	NM_172549	0.4453	0.0271394	22	8	357.513	1	1	28.4	9.015	81.5634	1	0.416347	34	11	222.597
6775201	Col18a1	NM_001109991	0.4453	0.0271394	22	6	10390.4	1	1	28.4	11.98	2528.04	1	1	28.4	10.36	1789.72
6775377	Rexo1	NM_025852	0.4453	0.0271394	22	9	0	0.325243	0.0100785	14	9	21.7789	1	1	28.4	9.52	110.82
6780779	Tbc1d9b	NM_029745	0.4453	0.0271394	25	5.5	355.498	1	1	28.4	13	232.15	1	1	28.4	10.595	295.558
6780871	Sar1b	NM_025535	0.4453	0.0271394	24	18	17506.6	1	1	28.4	13.09	2534.25	1	1	28.4	17.21	3690.39
6791444	Stat5b	NM_011489	0.4453	0.0271394	24	1	3188.34	0.0845496	0.00078998	22	4	3320.22	1	0.15798	30	11.6667	2189.96
6792097	Slc16a6	NM_001029842	0.4453	0.0271394	26	22	464.003	1	0.499811	24	12	249.467	1	1	28.4	11.05	225.924
6792491	Unc13d	NM_001009573	0.4453	0.0271394	14	1	214.819	1	1	28.4	15.795	11.7001	1	1	28.4	11.9	12.5943
6792539	Cygb	NM_030206	0.4453	0.0271394	22	13	339.199	1	1	28.4	16.51	12.4278	1	1	28.4	12.855	58.482
6801823	Ppp2r5e	NM_012024	0.4453	0.0271394	22	15	14.3543	0.606236	0.0343495	22	12.5	1625.07	1	1	28.4	14.04	431.164
6802043	Zfyve26	NM_001008550	0.4453	0.0271394	26	5	835.093	1	0.499811	22	4	579.615	1	1	28.4	9.07	183.966
6802382	Mlh3	NM_175337	0.4453	0.0271394	20	2	280.934	1	1	28.4	16.76	57.912	1	1	28.4	10.83	100.768
6804497	Asb13	NM_178283	0.4453	0.0271394	26	23.5	2741.03	1	0.597883	25	18.5	102.389	1	0.0271394	26	5	1591.77
6806435	Gcnt2	NM_023887	0.4453	0.0271394	24	12	676.56	1	0.104334	24	12	147.361	1	1	28.4	16.88	63.3529
6813887	Ctsl	NM_009984	0.4453	0.0271394	23	4	29373.4	0.11916	0.00145043	24	3	22593.2	1	0.021342	28	16.3333	29043.5
6819591	Sacs	NM_172809	0.4453	0.0271394	26	14	14.0007	0.679025	0.0432758	22	9	38.2545	1	1	28.4	16.105	3.8456
6823887	Sncg	NM_011430	0.4453	0.0271394	14	13	195.656	1	1	28.4	16.08	26.5147	1	1	28.4	16.945	41.0285
6832412	Gramd4	NM_172611	0.4453	0.0271394	26	24	331.704	1	0.712712	18	6	395.768	1	1	28.4	9.975	163.312
6834025	Npr3	NM_008728	0.4453	0.0271394	27	19	135.411	1	1	28.4	15.075	55.7837	1	1	28.4	14.015	9.76267
6837437	Arfgap3	NM_025445	0.4453	0.0271394	12	2	0	0.606236	0.0343495	22	11	492.571	1	1	28.4	16.94	119.315
6843694	5730409G15Rik	BC051078	0.4453	0.0271394	30	9.5	148.987	1	1	28.4	15.885	51.9568	1	1	28.4	15.12	101.584
6850088	Hspa1l	NM_013558	0.4453	0.0271394	28	27	47.0226	1	1	28.4	13.375	15.0992	1	1	28.4	16.465	8.47998
6854872	Akap8l	NM_017476	0.4453	0.0271394	24	5.5	254.417	0.540748	0.0271394	24	1	294.722	1	0.499811	30	10	195.374
6858743	Fzd8	NM_008058	0.4453	0.0271394	21	9.5	1483.26	1	1	28.4	10.175	452.053	1	0.345572	30	13	913.723
6859775	Sap130	NM_172965	0.4453	0.0271394	24	6.5	673.873	1	0.597883	22	5	415.072	1	0.104334	30	11	386.646
6859972	Egr1	NM_007913	0.4453	0.0271394	24	4.5	514.349	0.606236	0.0343495	22	2	840.114	1	1	28.4	13.925	115.366
6869754	Frat1	NM_008043	0.4453	0.0271394	24	22	599.414	1	0.285775	20	4	129.683	1	0.499811	40	0	160.655
6873510	Obfc1	NM_175360	0.4453	0.0271394	22	2	113.491	1	1	28.4	12.68	14.1743	1	1	28.4	9.52	36.9548
6874722	Usp6nl	NM_001080548	0.4453	0.0271394	22	2	1199.61	1	1	28.4	17.535	82.8393	1	1	28.4	9.84	489.157
6875556	Thnsl1	NM_177588	0.4453	0.0271394	22	4	152.594	0.946178	0.0842688	26	19	53.528	1	1	28.4	11.28	0.635335
6877895	Lass6	NM_172856	0.4453	0.0271394	22	13	1637.94	1	0.846691	24	12	788.848	1	1	28.4	12.08	74.7861
6885734	Zer1	NM_178694	0.4453	0.0271394	22	8	246.922	1	1	28.4	12.76	130.208	1	0.712712	26	14	206.617
6885773	Crat	NM_007760	0.4453	0.0271394	26	22	4135.94	0.420845	0.0167025	25	19	2653.21	1	0.067776	31	2	4250.31
6890258	Rpap1	NM_177294	0.4453	0.0271394	22	4	79.5495	1	1	28.4	9.855	27.9816	1	0.0842688	36	2	87.752
6890638	Gabpb1	NM_207669	0.4453	0.0271394	22	5	864.579	1	0.15798	20	5	360.483	1	1	28.4	9.735	128.019
6898010	Mme	NM_008604	0.4453	0.0271394	24	18.5	10466.3	1	1	28.4	13.88	69.719	1	1	28.4	17.21	11.2971
6899262	Adar	NM_001038587	0.4453	0.0271394	24	4.5	322.299	1	0.846691	10	3	67.5994	1	1	28.4	9.415	62.0592
6899268	Ube2q1	NM_027315	0.4453	0.0271394	22	10	831.345	1	0.285775	22	10	876.812	1	1	28.4	13.69	101.39
6899359	S100a13	NM_009113	0.4453	0.0271394	34	16	749.533	1	0.345572	16	9.5	525.097	1	0.846691	20	4	0
6900928	Alg14	NM_024178	0.4453	0.0271394	32	27	963.362	1	1	28.4	15.03	165.73	1	1	28.4	10.715	102.297
6905519	---	AK033940	0.4453	0.0271394	24	13	179.605	1	0.104334	24	9	55.6493	1	0.416347	18	7	100.904
6908461	S1pr1	NM_007901	0.4453	0.0271394	26	23	4542.67	1	0.345572	27	14.5	4993.23	1	0.846691	34	29	3188.98
6916737	Olfr1330	NM_146334	0.4453	0.0271394	10	5	14.0714	1	1	28.4	18.27	11.2907	1	1	28.4	11.325	3.10738
6917813	Ddefl1	NM_001008232	0.4453	0.0271394	22	13	81.0344	1	1	28.4	10.725	38.5267	1	0.924583	34	33	128.835
6917992	Mul1	NM_026689	0.4453	0.0271394	23	8	1980.92	1	0.104334	26	7	852.347	1	1	28.4	11.35	208.326
6919154	Nadk	NM_138671	0.4453	0.0271394	26	14	12964.8	1	0.416347	25	15.5	4783.93	1	0.285775	24.6667	6.33333	2083.91
6922672	Ptprd	NM_011211	0.4453	0.0271394	24	14	8029.62	1	1	28.4	11.105	964.995	1	0.846691	38	17.5	5007.34
6925360	Adprhl2	NM_133883	0.4453	0.0271394	20	7	142.623	1	1	28.4	11.86	46.2062	1	1	28.4	11.85	14.6406
6933973	Slc24a6	NM_133221	0.4453	0.0271394	22	8	3073.16	0.325243	0.0100785	24	3	1679.87	0.842323	0.00595676	30	12	3656.38
6942546	Slc12a9	NM_031406	0.4453	0.0271394	24	7	121.834	1	0.597883	40	36	62.4375	1	1	28.4	11.215	20.551
6947391	Dctn1	NM_007835	0.4453	0.0271394	24	5	335.098	1	1	28.4	13.065	0	1	1	28.4	9.65	113.066
6949800	Phb2	NM_007531	0.4453	0.0271394	28	10.5	7062.09	1	0.128645	40	12	7754.77	1	0.15798	20	1	7101.9
6952470	AB041803	ENSMUST00000115107	0.4453	0.0271394	26	9	1438.54	1	1	28.4	12.24	186.853	1	1	28.4	11.315	104.534
6954385	Gadd45a	NM_007836	0.4453	0.0271394	24	10	1026.51	1	1	28.4	13.615	164.178	1	1	28.4	13.385	133.54
6963213	Ilk	NM_010562	0.4453	0.0271394	26	5	1592.62	1	0.235442	18	10	923.34	1	1	28.4	12.02	252.155
6963271	Ppfibp2	NM_008905	0.4453	0.0271394	22	1	1584.7	0.540748	0.0271394	22	0	1092.06	1	0.712712	28	10	824.557
6963624	Insc	NM_173767	0.4453	0.0271394	26	22.5	652.235	1	0.104334	26	13	1077.98	1	0.499811	12	1	945.755
6964246	Ypel3	NM_026875	0.4453	0.0271394	24	7	1456.85	0.15381	0.00259733	24	3	2313.58	0.842323	0.00595676	28	14	1584.13
6965967	Bckdha	NM_007533	0.4453	0.0271394	22	10	8801.71	1	0.235442	28	5	5211.31	1	1	28.4	11.355	1105.42
6967022	Abcc6	NM_018795	0.4453	0.0271394	22	8	1888.54	1	1	28.4	12.115	308.969	1	1	28.4	9.92	617.601
6969631	Aqp11	NM_175105	0.4453	0.0271394	24	14	3245.83	1	1	28.4	11.46	292.333	1	1	28.4	13.225	370.426
6971316	Mvp	NM_080638	0.4453	0.0271394	24	10	297.904	1	0.193236	24	9	205.344	1	1	28.4	13.735	125.124
6971341	2011-09-01	NM_017461	0.4453	0.0271394	30	0	84.2164	1	1	28.4	10.46	13.16	1	1	28.4	16.02	8.84979
6973679	Arhgef18	NM_133962	0.4453	0.0271394	26	21	330.148	1	1	28.4	10.79	37.7185	1	0.0167025	28	4	378.231
6976956	Lpar2	NM_020028	0.4453	0.0271394	26	9	77.711	1	0.235442	28	6	32.739	1	1	28.4	15.925	12.1089
6981870	Mtmr7	NM_001040699	0.4453	0.0271394	22	18	48.0126	1	0.597883	12	11	112.571	1	0.846691	10	1	190.565
6983873	Nfix	NM_001081981	0.4453	0.0271394	28	10	5360.22	1	0.345572	32	6	2882.66	1	1	28.4	11.41	420.086
6993833	Spc24	ENSMUST00000098942	0.4453	0.0271394	24	17	465.418	1	1	28.4	13.385	51.7231	1	1	28.4	11.745	122.092
6994797	Olfr975	NM_146828	0.4453	0.0271394	18	9	20.7889	1	1	28.4	9.855	7.87858	1	1	28.4	12.245	0
7012774	Efnb1	NM_010110	0.4453	0.0271394	24	11.5	197.071	1	1	28.4	10.885	40.4133	1	1	28.4	14.4	52.2799
4648639	---	---	0.50023	0.0307445	16	2	52.7502	1	1	28.4	16.015	5.76045	1	0.597883	40	5	49.3561
6791326	Krt25	NM_133730	0.50023	0.0307445	28	26	10.3238	1	1	28.4	12.395	5.53806	1	1	28.4	11.425	0.870802
6810563	Hcn1	NM_010408	0.50023	0.0307445	22	7	4.6669	1	1	28.4	16.3	1.33325	1	1	28.4	12.495	1.60301
6818953	Rnase10	NM_029145	0.50023	0.0307445	10	9	5.3033	1	1	28.4	15.655	0.030052	1	1	28.4	17.915	2.21289
6837143	Cbx7	NM_144811	0.50023	0.0307445	22	8	295.005	1	0.712712	22	5	253.568	1	1	28.4	13.5	55.3721
6885484	Snapc4	NM_172339	0.50023	0.0307445	24	5	44.6891	1	1	28.4	12.845	35.4801	1	1	28.4	10.815	34.6719
6898996	Fcrl1	NM_178165	0.50023	0.0307445	23	4	14.1068	1	1	28.4	16.285	2.86979	1	1	28.4	17.475	2.03505
6939731	Csn2	NM_009972	0.50023	0.0307445	22	7	19.4454	1	0.416347	14	12	15.4149	1	1	28.4	12.925	1.84661
6964352	Setd1a	NM_178029	0.50023	0.0307445	24	5.5	156.978	1	1	28.4	11.935	20.6846	1	1	28.4	10.395	77.4763
6970891	Umod	NM_009470	0.50023	0.0307445	34	32	21.0718	1	1	28.4	12.195	2.50952	1	1	28.4	17.18	2.64988
6977547	Gypa	NM_010369	0.50023	0.0307445	26	22	16.9706	1	1	28.4	16.375	5.04768	1	1	28.4	15.585	0.651599
7016826	Gpc3	NM_016697	0.50023	0.0307445	10	0	84.6407	1	1	28.4	16.185	3.09748	1	1	28.4	10.935	6.22855
4590155	---	---	0.521095	0.0343495	28	23	135.835	1	0.416347	24	12	434.164	1	1	28.4	13.94	155.23
4680955	---	---	0.521095	0.0343495	22	21	1404.03	1	1	28.4	10.065	210.384	1	1	28.4	10.69	140.373
4708750	---	---	0.521095	0.0343495	24	12	133.077	1	0.712712	18	17	65.9024	1	0.846691	40	19	89.8733
4855566	---	---	0.521095	0.0343495	24	14.5	9172.02	1	1	28.4	13.085	396.178	1	0.846691	32	25	4567.2
4918982	---	---	0.521095	0.0343495	24	5	1004.23	1	1	28.4	14.82	310.137	1	0.846691	12	2	591.353
4991524	---	---	0.521095	0.0343495	10	6	113.208	1	1	28.4	18.335	67.9218	1	1	28.4	11.455	25.249
5014765	---	---	0.521095	0.0343495	32	7	0.989949	1	0.846691	20	9	1.62635	1	1	28.4	16.595	0.0456084
5138467	---	---	0.521095	0.0343495	22	6	1795.84	0.946178	0.0842688	20	10	864.084	1	0.345572	32	10	1033.3
5175143	---	---	0.521095	0.0343495	16	5	12.0915	1	1	28.4	11.28	4.91156	1	1	28.4	15.825	1.81833
5242730	---	---	0.521095	0.0343495	21	15	113.986	1	1	28.4	10.675	18.1161	1	0.416347	32	5	52.6795
5257782	---	---	0.521095	0.0343495	26	13	8179.53	1	1	28.4	9.71	2886.68	1	1	28.4	11.125	452.691
5317967	---	---	0.521095	0.0343495	22	13	266.509	1	1	28.4	13.66	14.9938	1	1	28.4	13.87	17.4811
5397779	---	---	0.521095	0.0343495	30	12	97.7222	1	1	28.4	13.665	5.92096	1	0.345572	18	13	0
5546377	---	---	0.521095	0.0343495	12	10	20.4354	1	0.712712	20	0	17.1827	1	1	28.4	15.31	3.38952
6763235	Qsox1	NM_001024945	0.521095	0.0343495	24	1	10974.7	1	1	28.4	13.515	1352.31	1	0.193236	36	34	23269.7
6766368	Map3k5	NM_008580	0.521095	0.0343495	24	12	506.571	1	0.285775	24	10	507.986	1	1	28.4	11.915	68.7859
6769245	Sf3a2	NM_013651	0.521095	0.0343495	26	4	271.034	1	1	28.4	16.42	45.5925	1	1	28.4	10.005	152.256
6775310	Rnf126	NM_144528	0.521095	0.0343495	22	12	1264.38	1	0.416347	14	7	988.535	1	0.416347	18	3	847.962
6775449	Mrpl54	NM_025317	0.521095	0.0343495	12	10	175.645	1	1	28.4	14.57	77.3621	1	1	28.4	15.095	76.434
6778083	Mettl7b	NM_027853	0.521095	0.0343495	24	16	19067.8	1	0.380959	16	9	3204.4	1	0.021342	32	3	44688.7
6781293	Olfr311	NM_146537	0.521095	0.0343495	30	2	10.3945	1	1	28.4	11.985	2.74676	1	1	28.4	12.99	6.47144
6782656	Flot2	NM_008028	0.521095	0.0343495	24	13	207.112	1	0.597883	22	12	634.77	1	0.345572	22	2	468.105
6783654	Ankrd40	NM_027799	0.521095	0.0343495	24	20	1262.11	0.15381	0.00259733	26	13	1972.12	1	1	28.4	13.14	1084.52
6784399	Acbd4	NM_025988	0.521095	0.0343495	26	24	419.385	1	0.416347	22	16	526.087	1	1	28.4	11.945	468.904
6784810	Prkar1a	NM_021880	0.521095	0.0343495	24	4	3949.26	0.11916	0.00145043	20	6	3494.95	1	1	28.4	11.76	682.769
6789636	Olfr399	NM_147004	0.521095	0.0343495	40	36	30.1227	1	1	28.4	15.44	1.34138	1	0.597883	16	11	33.1633
6791275	Med24	NM_011869	0.521095	0.0343495	26	24	223.941	1	1	28.4	12.68	18.675	1	1	28.4	11.17	196.309
6791528	Dusp3	NM_028207	0.521095	0.0343495	22	15	994.475	1	1	28.4	13.71	254.176	1	0.193236	30	28.5	1549.16
6792122	Abca9	NM_147220	0.521095	0.0343495	24	18	223.446	0.606236	0.0343495	27	14	179.181	1	1	28.4	15.455	29.8067
6793226	Sdc1	NM_011519	0.521095	0.0343495	24	22	14595.4	1	0.416347	14	11	19100.7	1	1	28.4	13.995	3512.74
6796238	Fut8	NM_016893	0.521095	0.0343495	22	0	217.718	1	1	28.4	13.245	4.4226	1	1	28.4	11.155	20.3166
6796784	Ahsa1	NM_146036	0.521095	0.0343495	22	19	5355.98	0.11916	0.00145043	24	16.5	2291.87	0.155657	0.000153442	24	6	7917.05
6799852	Dus4l	NM_028002	0.521095	0.0343495	24	22	182.292	1	0.597883	18	9	149.695	1	0.345572	12	1	0
6802041	Rdh11	NM_021557	0.521095	0.0343495	24	1	7613.42	0.325243	0.0100785	22	2	8672.66	1	0.597883	12	1	8561.3
6805399	Slc17a1	NM_009198	0.521095	0.0343495	24	22	285.105	1	1	28.4	12.66	131.375	1	1	28.4	14.25	88.2667
6806034	Serpinb6b	NM_011454	0.521095	0.0343495	26	23	116.46	0.839358	0.067776	20	5	73.3977	1	1	28.4	12.08	26.3889
6811564	Hist1h4i	NM_175656	0.521095	0.0343495	25	19.5	264.352	1	1	28.4	18.115	128.265	1	1	28.4	12.765	47.7626
6817984	Bap1	NM_027088	0.521095	0.0343495	22	9	1156.19	1	1	28.4	12.02	182.378	1	1	28.4	11.285	161.001
6818017	Eaf1	NM_028932	0.521095	0.0343495	22	11	1213.96	1	0.846691	14	7	318.339	1	1	28.4	14.41	92.5521
6820040	Loxl2	NM_033325	0.521095	0.0343495	16	14	53.1744	1	1	28.4	15.665	7.18385	1	1	28.4	16.32	10.2916
6822879	Oxsm	NM_027695	0.521095	0.0343495	24	2	1724.49	1	1	28.4	12.845	50.8636	1	1	28.4	10.575	392.806
6831868	Micall1	NM_177461	0.521095	0.0343495	22	4	33.3047	1	1	28.4	12.005	35.2906	1	1	28.4	9.235	55.0649
6836792	AA409316	BC117947	0.521095	0.0343495	23.3333	6	301.133	1	1	28.4	11.65	36.8604	1	0.846691	28	12	123.39
6840586	Tnk2	NM_016788	0.521095	0.0343495	16	15	15.6978	0.679025	0.0432758	26	12	199.97	1	0.104334	40	1.66667	68.0472
6840819	Lrrc58	NM_177093	0.521095	0.0343495	24	18	5587.98	0.839358	0.067776	24	16	1025.23	1	0.0343495	28	1	3097.13
6843198	Itsn1	NM_010587	0.521095	0.0343495	22	2	539.735	1	0.104334	20	3	102.743	1	1	28.4	11.385	80.071
6844306	Dgcr14	NM_022408	0.521095	0.0343495	24	5	165.18	1	1	28.4	12.4	68.5346	1	1	28.4	10.53	82.1386
6849952	Zfp414	NM_026712	0.521095	0.0343495	23	4.5	214.43	1	0.285775	22	4	104.652	1	1	28.4	10.36	61.0173
6855772	Bysl	NM_016859	0.521095	0.0343495	12	2	472.772	0.0990341	0.00107387	24	13	1307.3	1	0.846691	28	0	900.147
6860710	Eno1	NM_023119	0.521095	0.0343495	27	17	1.20208	1	1	28.4	10.045	2.13582	1	0.846691	16	0	4.45477
6862088	Mbd1	NM_013594	0.521095	0.0343495	24	12	571.625	0.0845496	0.00078998	24	13	1344.85	1	1	28.4	11.485	423.809
6867165	Tshz1	NM_001081300	0.521095	0.0343495	20	15	316.006	1	1	28.4	15.11	46.5393	1	1	28.4	14.785	75.3366
6867644	Coro1b	NM_011778	0.521095	0.0343495	22	9	4239.74	0.540748	0.0271394	24	7	2707.72	1	0.235442	30	16	3722.21
6868041	Cybasc3	NM_201351	0.521095	0.0343495	26	25	812.395	1	1	28.4	15.1	101.46	1	1	28.4	10.47	135.91
6869334	Ifit1	NM_008331	0.521095	0.0343495	24	3	148.28	1	1	28.4	11.43	85.998	1	1	28.4	11.045	154.56
6875681	Entpd8	NM_028093	0.521095	0.0343495	22	5	1770.88	1	1	28.4	12.23	955.513	1	1	28.4	11.185	511.259
6881123	Slc20a1	NM_015747	0.521095	0.0343495	28	11	2079.6	0.0845496	0.00078998	24	12.5	1009.75	1	0.846691	26	24	1267.14
6883722	Npepl1	NM_213733	0.521095	0.0343495	24	11.5	626.426	0.420845	0.0167025	26	9	1631.58	1	0.345572	22	0	691.055
6888898	Cd82	NM_007656	0.521095	0.0343495	22	6	12374.9	0.839358	0.067776	21	7.5	10081.8	1	0.067776	34	14	13492.9
6889432	Elp4	NM_023876	0.521095	0.0343495	22	3	1931.25	1	1	28.4	12.69	152.272	1	1	28.4	10.85	407.807
6891065	Slc23a2	NM_018824	0.521095	0.0343495	22	8	2160.42	0.474693	0.021342	22	4	1775.26	1	0.0130072	27	16.5	554.442
6907421	Hsd3b5	NM_008295	0.521095	0.0343495	25	4.5	2714.44	1	0.345572	35	31	5988.49	1	0.235442	20	2	1536.97
6916511	Mknk1	NM_021461	0.521095	0.0343495	26	13	776.828	1	0.128645	24	12	505.228	1	1	28.4	15.055	0
6917298	Bsdc1	NM_133889	0.521095	0.0343495	22	8	2960.02	1	1	28.4	14.94	424.577	1	1	28.4	11.82	283.849
6917489	Taf12	NM_025579	0.521095	0.0343495	22	20	316.925	1	1	28.4	13.155	93.7825	1	1	28.4	12.455	129.975
6917794	Gale	NM_178389	0.521095	0.0343495	24	11.5	418.466	0.474693	0.021342	22	17	244.871	1	0.0842688	12	1	822.153
6919932	Osgin2	NM_145950	0.521095	0.0343495	22	20	39.598	1	1	28.4	15.86	20.8798	1	1	28.4	10.99	3.15582
6921557	Baat	NM_007519	0.521095	0.0343495	26	22.5	17459.4	1	0.128645	18	9	6805.41	1	1	28.4	13.585	2164.61
6922335	Tnc	NM_011607	0.521095	0.0343495	28	0	12.2329	1	1	28.4	17.895	5.84601	1	1	28.4	16.38	3.68544
6922536	Cdk5rap2	NM_145990	0.521095	0.0343495	24	3	62.1547	0.474693	0.021342	24	1	14.3543	1	0.712712	28	11	22.486
6929651	Agbl5	NM_001048192	0.521095	0.0343495	26	9	61.0233	1	1	28.4	11.33	39.5167	1	0.0842688	28	16	38.608
6934076	Brap	NM_028227	0.521095	0.0343495	24	9	2325.11	0.13439	0.00194684	22	3	1073.32	1	0.104334	10	3	2124.01
6938217	2310045A20Rik	NM_172710	0.521095	0.0343495	24	9	614.971	1	0.345572	26.4	8.4	640.412	1	1	28.4	11.715	118.033
6940201	Paqr3	NM_198422	0.521095	0.0343495	24	15.5	1085.48	1	0.345572	26	13	490.449	1	0.285775	28	4	623.456
6941032	2410025L10Rik	NM_028596	0.521095	0.0343495	26	8	264.882	1	1	28.4	10.72	43.3099	1	1	28.4	11.5	34.2261
6941273	Rnf10	NM_016698	0.521095	0.0343495	22	8	1881.4	1	0.499811	14	9	4326.36	1	1	28.4	13.57	1176.06
6941637	Tpcn1	NM_145853	0.521095	0.0343495	24	14.5	1832.29	1	0.235442	28	13	724.784	1	1	28.4	12.68	625.616
6942673	3110082I17Rik	NM_028469	0.521095	0.0343495	26	7	127.986	1	0.779701	14	0	75.024	1	1	28.4	11.225	4.46998
6949211	Mkrn2	NM_023290	0.521095	0.0343495	22	8	789.06	1	1	28.4	13.99	198.713	1	0.193236	37	11.5	790.545
6949586	Tuba8	NM_017379	0.521095	0.0343495	12	6	70.64	1	1	28.4	11.06	77.6774	1	1	28.4	15.445	9.6368
6950397	8430419L09Rik	BC137674	0.521095	0.0343495	26	16	1604.64	1	1	28.4	11.98	114.696	1	1	28.4	14.78	151.133
6951440	Slc25a13	NM_015829	0.521095	0.0343495	22	14	11388.1	1	0.104334	24	12	11115.2	1	1	28.4	13.825	2156.05
6953461	Tra2a	NM_198102	0.521095	0.0343495	22	0	1050.48	1	0.235442	26	17	285.671	1	0.067776	12	1	0
6953763	Fkbp14	NM_153573	0.521095	0.0343495	22	20	249.184	1	0.104334	26	12	198.061	1	1	28.4	16.42	24.8347
6957465	Csda	NM_139117	0.521095	0.0343495	24	19	163.483	1	1	28.4	12.575	920.839	1	0.128645	28	27	240.982
6965143	Athl1	NM_145387	0.521095	0.0343495	26	4	838.558	1	1	28.4	10.91	295.471	1	1	28.4	10.94	191.345
6965979	Ccdc97	NM_028771	0.521095	0.0343495	25	5.5	336.477	1	1	28.4	12.54	29.9424	1	0.846691	18	17	503.743
6966329	Lsr	NM_017405	0.521095	0.0343495	24	21	5949.53	1	0.846691	18	6	1118.78	1	0.416347	40	1	2032.44
6968728	Pex11a	NM_011068	0.521095	0.0343495	26	14	8277.18	1	0.416347	20	12	3638.91	1	0.846691	28	23	2413.14
6974137	Cul4a	NM_146207	0.521095	0.0343495	26	12	673.378	1	1	28.4	10.485	264.74	1	0.235442	32	15	163.625
6975420	D8Ertd82e	NM_172911	0.521095	0.0343495	22	4	42.4264	1	1	28.4	16.165	14.0191	1	0.285775	23	8.5	17.1827
6979073	Tat	NM_146214	0.521095	0.0343495	24	17	91097.7	0.36786	0.0130072	22	12	94777.1	1	0.499811	26	3.66667	60270.2
6979527	6430548M08Rik	BC027126	0.521095	0.0343495	12	2	142.199	0.679025	0.0432758	24	13	53.528	1	1	28.4	13.35	6.45553
6983894	Junb	NM_008416	0.521095	0.0343495	30	4.5	166.453	1	1	28.4	16.7	32.8366	1	1	28.4	15.555	39.3943
6988298	Olfr920	NM_146787	0.521095	0.0343495	22	8	2.6163	1	1	28.4	9.405	1.69458	1	1	28.4	12.295	0.618011
6989917	Parp16	NM_177460	0.521095	0.0343495	24	19	1373.91	1	0.193236	28	18.5	826.891	1	0.067776	26	6	1178.68
6993838	Dock6	NM_177030	0.521095	0.0343495	20	12	81.388	1	1	28.4	11.74	9.67216	1	1	28.4	11.96	27.7942
6994666	Chek1	NM_007691	0.521095	0.0343495	26	19	49.0025	1	1	28.4	12.49	10.1396	1	1	28.4	14.825	0.0947523
6995736	Elmod1	NM_177769	0.521095	0.0343495	14	9	13.435	1	0.416347	18	15.5	4.03051	1	1	28.4	16.405	1.189
6998587	Parp3	BC014870	0.521095	0.0343495	30	28	248.053	1	1	28.4	19.825	260.027	1	1	28.4	10.7	327.028
6998692	Klhdc8b	NM_030075	0.521095	0.0343495	24	8	115.824	0.679025	0.0432758	26	6	103.096	0.627918	0.00344478	26	21	49.1439
7012866	Gjb1	NM_008124	0.521095	0.0343495	22	7	22258.9	1	0.712712	28	2	1891.51	1	1	28.4	12.695	3553.1
7014030	Tceal1	NM_146236	0.521095	0.0343495	21	5.5	215.986	1	0.345572	18	7	55.2958	1	1	28.4	13.29	31.7205
7017668	Mpp1	NM_008621	0.521095	0.0343495	24	14	402.061	0.36786	0.0130072	24	10	886.5	1	0.846691	26	20	991.222
4698834	---	---	0.58462	0.0388127	12	5	117.521	1	1	28.4	14.045	8.54185	1	0.416347	26	12	40.4465
6771858	Vip	NM_011702	0.58462	0.0388127	16	12	1.13137	1	1	28.4	13.14	0.312188	1	0.0760224	22	10	0.989949
6826883	Dach1	NM_007826	0.58462	0.0388127	16	12	14.9907	1	0.345572	36	27	4.80833	1	1	28.4	13.56	1.49482
6847713	AY026312	NM_133359	0.58462	0.0388127	28	20	2.26274	1	1	28.4	17.915	0.593616	1	1	28.4	16.38	0.0618718
6865421	Hdhd1a	NM_026108	0.58462	0.0388127	28	23	13.7886	1	1	28.4	10.82	2.61453	1	1	28.4	10.8	4.76307
6871517	Zp1	NM_009580	0.58462	0.0388127	14	13	3.11127	1	1	28.4	18.635	1.45735	1	1	28.4	17.2	2.01349
6903360	Sirpb1	NM_001002898	0.58462	0.0388127	40	14	1.55563	1	1	28.4	15.97	2.71105	1	0.285775	36	33	6.85894
6941754	Ift81	NM_009879	0.58462	0.0388127	20	2	30.9006	0.0510579	0.000301988	24	0	22.1324	1	0.712712	33	4.5	12.1269
6946013	Zfp775	NM_173429	0.58462	0.0388127	20	11	0	1	1	28.4	13.105	11.6464	1	1	28.4	17.43	17.0908
6962941	Chchd8	NM_183270	0.58462	0.0388127	36	28	51.8309	1	0.345572	10	3	0	1	1	28.4	10.04	101.207
6966322	Cd22	NM_009845	0.58462	0.0388127	24	7	26.9408	1	0.345572	40	2	11.5966	1	0.712712	20	15	19.799
4405390	---	---	0.606797	0.0432758	38	10	3.25269	0.839358	0.0610265	20	5	0.989949	1	1	28.4	10.7	0.480479
4433454	---	---	0.606797	0.0432758	26	22	1270.6	1	0.846691	22	2	875.752	1	1	28.4	13.295	63.2914
4467786	---	---	0.606797	0.0432758	30	7.5	333.365	1	1	28.4	10.66	18.9628	1	1	28.4	15.695	28.5091
4531924	---	---	0.606797	0.0432758	20	10	212.981	1	1	28.4	11.46	43.0066	1	1	28.4	12.395	30.9458
4547419	---	---	0.606797	0.0432758	24	15	6925.12	1	0.193236	24	12.5	2633.83	1	1	28.4	17.355	1238.45
4595815	---	---	0.606797	0.0432758	37	12.5	152.488	1	1	28.4	13.985	57.6603	1	0.416347	10	4	388.626
4613373	---	---	0.606797	0.0432758	38	18	1486.69	1	1	28.4	12.29	400.424	1	1	28.4	15.14	472.064
4760592	---	---	0.606797	0.0432758	24	21	104.723	1	1	28.4	10.185	109.966	1	1	28.4	10.61	160.234
4768074	---	---	0.606797	0.0432758	18	10	199.616	1	1	28.4	13.125	45.4511	1	0.597883	28	4	127.986
4792360	---	---	0.606797	0.0432758	22	12	9.82878	1	1	28.4	10.33	2.43775	1	1	28.4	11.005	1.37638
4801291	---	---	0.606797	0.0432758	14	7	26.163	1	1	28.4	16.57	2.76443	1	1	28.4	11.305	3.35628
4816485	---	---	0.606797	0.0432758	22	4	108.541	1	1	28.4	11.495	6.44599	1	1	28.4	10.115	13.4209
4837398	---	---	0.606797	0.0432758	16	6	23.5467	1	1	28.4	9.445	6.25542	1	1	28.4	11.435	2.00677
4871744	---	---	0.606797	0.0432758	26	5	88.7419	1	0.499811	40	36	210.859	1	0.846691	28	14	28.5671
4966339	---	---	0.606797	0.0432758	12	1	23.7588	1	0.597883	24	13	11.1723	1	1	28.4	16.725	13.8515
5022756	---	---	0.606797	0.0432758	24	15	4.03051	1	1	28.4	13.815	1.13844	1	0.0842688	32	2	18.3848
5317276	---	---	0.606797	0.0432758	20	4	86.3377	1	1	28.4	13.465	14.3384	1	1	28.4	10.605	16.3412
5366175	---	---	0.606797	0.0432758	16	3	474.469	1	1	28.4	11.82	59.1092	1	1	28.4	16.17	122.8
5448275	---	---	0.606797	0.0432758	24	5	761.13	1	0.235442	22	2	685.964	1	0.416347	28	14	260.145
5483244	---	---	0.606797	0.0432758	26	13	7562.37	1	1	28.4	12.27	1169.28	1	1	28.4	11.83	948.712
5510750	---	---	0.606797	0.0432758	18	1	482.176	1	1	28.4	14.205	69.2795	1	1	28.4	11.155	1.71332
5584050	---	---	0.606797	0.0432758	16	3.5	5.51543	1	0.315673	10	3	4.03051	1	0.0842688	38	0	17.1827
6750547	Ctdsp1	NM_153088	0.606797	0.0432758	22	8	3151.36	1	1	28.4	12.255	419.435	1	1	28.4	14.865	0
6750560	Ttll4	NM_001014974	0.606797	0.0432758	22	12	1035.84	1	0.416347	22	13	703.713	1	1	28.4	12.74	252.784
6754700	4930455F23Rik	BC048086	0.606797	0.0432758	28	13.5	141.881	1	1	28.4	17.36	39.167	1	1	28.4	9.095	14.2973
6755562	D230039L06Rik	BC120791	0.606797	0.0432758	22	14	20.8597	1	1	28.4	12.515	1.72251	1	1	28.4	14.07	9.08597
6755856	Susd4	NM_144796	0.606797	0.0432758	20	15	222.88	1	1	28.4	13.92	223.147	1	1	28.4	10.66	219.232
6757282	Mcm3	NM_008563	0.606797	0.0432758	20	0	82.6608	1	1	28.4	11.28	6.79494	1	1	28.4	11.83	0.446538
6760678	Hes6	NM_019479	0.606797	0.0432758	22	16	6945.56	0.474693	0.021342	24	16.5	2685.31	1	0.0130072	26	4	4193.14
6764016	Uhmk1	NM_010633	0.606797	0.0432758	28	12	2817.25	1	0.193236	26	12	562.503	1	1	28.4	15.64	172.211
6764050	Ndufs2	NM_153064	0.606797	0.0432758	38	12	3617.06	1	1	28.4	12.76	628.854	1	1	28.4	12.445	935.13
6766372	Mtap7	NM_008635	0.606797	0.0432758	24	1	649.69	1	1	28.4	11.335	104.532	1	1	28.4	10.05	118.386
6769189	Stk11	NM_011492	0.606797	0.0432758	24	4	995.818	0.36786	0.0130072	20	6	2238.13	1	1	28.4	10.175	291.71
6772810	Enpp3	NM_134005	0.606797	0.0432758	24	4	7074.74	0.0128763	1.65562e-05	24	1	9456.85	0.924807	0.00776882	28	13	4001.73
6781561	Ttc19	NM_028360	0.606797	0.0432758	26	12	511.45	1	0.128645	36	12	245.295	1	1	28.4	11.48	80.2446
6782031	Trp53	NM_001127233	0.606797	0.0432758	24	3	847.962	1	1	28.4	11.795	229.972	1	1	28.4	10.89	308.772
6782149	Kif1c	NM_153103	0.606797	0.0432758	26	0	963.362	1	1	28.4	18.515	255.553	1	0.597883	14	2.5	1134.06
6782246	Ggt6	NM_027819	0.606797	0.0432758	26	20	850.649	1	1	28.4	14.34	240.401	1	0.128645	26	7	622.466
6783489	Mmd	NM_026178	0.606797	0.0432758	20	9	7721.96	0.13439	0.00194684	20	6	9228.52	1	0.499811	24	15	6626.16
6787819	Timd2	NM_134249	0.606797	0.0432758	28	21	3337.69	1	1	28.4	13.355	99.4058	1	1	28.4	11.54	722.106
6789359	Centb1	NM_153788	0.606797	0.0432758	18	14	0	1	1	28.4	16.945	10.3227	1	1	28.4	13.235	0
6791151	Kpnb1	NM_008379	0.606797	0.0432758	22	0	7131.74	0.420845	0.0167025	26	17	6478.3	1	0.104334	26	4	6186.62
6791238	Fbxl20	NM_028149	0.606797	0.0432758	24	7.5	1062.07	0.0376854	0.000153442	26	25	1503.45	1	1	28.4	11.94	513.898
6791942	Tex2	NM_198292	0.606797	0.0432758	24	1	7673.24	1	1	28.4	14.085	93.2543	1	1	28.4	10.045	2186.16
6792887	Zfp750	NM_178763	0.606797	0.0432758	26	11	451.629	1	1	28.4	10.705	40.3701	1	1	28.4	12.6	48.8614
6796563	Acot1	NM_012006	0.606797	0.0432758	26	21	4735.85	0.36786	0.0130072	24	21	2409.32	1	0.846691	26	6	2967.59
6808892	Acot12	NM_028790	0.606797	0.0432758	22	11	8947.87	0.0732044	0.000577302	24	7	11264.2	0.56112	0.00259733	29	18	11464.5
6808964	Serinc5	NM_172588	0.606797	0.0432758	22	6	3181.7	1	0.128645	30	3	3336.62	1	0.235442	32	14	1922.76
6819154	Lrp10	NM_022993	0.606797	0.0432758	22	8	994.334	1	1	28.4	12.34	330.868	1	1	28.4	11.2	249.551
6824363	D14Ertd436e	BC090995	0.606797	0.0432758	24	11	180.736	1	0.193236	26	23	226.203	1	1	28.4	11.55	79.7167
6825305	Gata4	NM_008092	0.606797	0.0432758	26	21	170.483	1	1	28.4	12.05	23.4745	1	0.416347	26	4	975.595
6831592	Zfp41	NM_011759	0.606797	0.0432758	20	5	8.55599	1	1	28.4	10.675	2.1489	1	1	28.4	10.845	5.05758
6831845	Cdc42ep1	NM_027219	0.606797	0.0432758	22	12	167.796	1	0.15798	23.3333	10.6667	109.719	1	1	28.4	14.26	45.106
6832142	Aco2	NM_080633	0.606797	0.0432758	26	14	14529.1	1	0.499811	37	12.5	8351.99	1	1	28.4	11.465	1188.07
6832256	Bik	NM_007546	0.606797	0.0432758	12	7	50.4874	1	1	28.4	12.33	95.1504	1	1	28.4	14.34	10.2955
6833980	Rai14	NM_030690	0.606797	0.0432758	26	23	1508.82	1	1	28.4	11.14	103.204	1	1	28.4	13.65	203.54
6837127	Unc84b	NM_194342	0.606797	0.0432758	22	8	1347.96	1	0.15798	24	4	1018.52	1	1	28.4	11.135	224.35
6837403	Pcdhb11	BC116321	0.606797	0.0432758	26	7	10871.8	1	1	28.4	12.675	3204.64	1	1	28.4	13.315	1660.59
6838469	Racgap1	NM_012025	0.606797	0.0432758	24	1	24.3952	1	1	28.4	11.195	4.02627	1	1	28.4	15.195	3.98738
6840507	Dlg1	NM_007862	0.606797	0.0432758	24	6	695.086	0.24129	0.00595676	22	5	1670.96	1	1	28.4	11.7	578.669
6842009	Pros1	NM_011173	0.606797	0.0432758	20	18	770.888	1	1	28.4	14.845	0	1	1	28.4	14.94	683.946
6856231	Ptprs	NM_011218	0.606797	0.0432758	26	7	77.2868	0.13439	0.00194684	30	4	67.1751	1	0.0842688	24	19	4.59619
6860952	Csnk1g3	NM_152809	0.606797	0.0432758	27	13	159.205	1	1	28.4	9.81	276.135	1	1	28.4	13.76	75.6562
6869570	Plce1	NM_019588	0.606797	0.0432758	24	14	79.4081	1	1	28.4	10.375	56.5756	1	1	28.4	13.205	58.511
6871128	Kat5	NM_178637	0.606797	0.0432758	26	0	189.01	1	1	28.4	13.27	0	1	1	28.4	10.445	109.887
6871136	Pcnxl3	NM_144868	0.606797	0.0432758	22	8	336.088	1	0.712712	34	5	565.261	1	0.499811	34	4	257.528
6871542	Ms4a1	NM_007641	0.606797	0.0432758	22	6	21.4253	1	1	28.4	11.75	8.34032	1	1	28.4	13.455	5.28562
6876029	Gle1	NM_028923	0.606797	0.0432758	22	8	2335.29	1	1	28.4	9.565	138.111	1	1	28.4	17.39	891.071
6876154	Abl1	NM_001112703	0.606797	0.0432758	24	11.5	418.466	1	1	28.4	11.21	28.1966	1	1	28.4	9.905	86.7422
6878347	Plekha3	NM_031256	0.606797	0.0432758	26	11	2274.48	1	1	28.4	12.83	583.202	1	1	28.4	15.8	680.242
6879120	Pex16	NM_145122	0.606797	0.0432758	12	9	3502.94	1	1	28.4	12.52	1193.16	1	0.712712	22	20	4626.25
6882279	Tbc1d20	NM_024196	0.606797	0.0432758	20	11	811.971	0.15381	0.00259733	24	8	595.455	1	1	28.4	11.46	34.4697
6883317	Slc9a8	NM_148929	0.606797	0.0432758	24	8	1802.2	1	0.846691	22	9	768.979	1	1	28.4	12.355	90.6196
6883487	Tshz2	NM_080455	0.606797	0.0432758	22	6	194.384	1	1	28.4	12.655	29.6409	1	0.285775	40	3	175.787
6884644	Taf3	NM_027748	0.606797	0.0432758	22	21	7898.67	1	1	28.4	13.72	4034.95	1	1	28.4	17.65	1915.21
6888696	Ptprj	NM_008982	0.606797	0.0432758	12	7	1213.75	0.211129	0.00454255	20	2	3541.54	1	1	28.4	11.175	2720.89
6892579	Tgm2	NM_009373	0.606797	0.0432758	26	24.5	2276.99	1	0.499811	14	11	7490.03	1	1	28.4	10.455	2132.76
6899097	Mef2d	NM_133665	0.606797	0.0432758	24	22	451.063	1	0.712712	26	18	281.711	1	1	28.4	12.685	238.245
6906220	Etfdh	NM_025794	0.606797	0.0432758	22	5	16936.6	0.24129	0.00595676	20	7	8466.54	1	0.128645	28	15	0
6911537	Chd7	NM_001081417	0.606797	0.0432758	24	12	45.2548	1	1	28.4	14.06	32.1649	1	1	28.4	9.695	9.60711
6912477	Bach2	NM_001109661	0.606797	0.0432758	24	5	180.029	1	1	28.4	11.785	88.5333	1	0.499811	12	2	204.283
6913128	Grhpr	NM_080289	0.606797	0.0432758	22	8	2438.17	1	1	28.4	13.375	1780.24	1	0.416347	24	20	5591.31
6917557	Wasf2	NM_153423	0.606797	0.0432758	26	6.5	341.427	1	1	28.4	10.425	43.2537	1	1	28.4	10.225	225.267
6918998	Nol9	NM_028727	0.606797	0.0432758	24	13	720.33	0.763806	0.054277	24	12.5	945.685	1	1	28.4	12.825	162.409
6919895	Necab1	NM_178617	0.606797	0.0432758	25	3	3814.38	1	1	28.4	14.25	696.12	1	0.067776	30	11	2325.11
6932509	Stbd1	NM_175096	0.606797	0.0432758	26	11	3215.21	0.946178	0.0842688	22	10	1108.88	1	0.0343495	24	1	2205.89
6933606	BC057022	BC057022	0.606797	0.0432758	26	21	122.895	1	1	28.4	13.285	38.1717	1	1	28.4	15.06	21.7188
6933970	Sds	NM_145565	0.606797	0.0432758	24	12	6953.97	0.679025	0.0432758	22	12	3477.06	1	1	28.4	11.675	26.5314
6939714	Ugt2a3	NM_028094	0.606797	0.0432758	24	18	28224.1	1	0.712712	16	11	12919.8	1	1	28.4	13.21	1963.6
6940912	Mfsd7	NM_172883	0.606797	0.0432758	26	5	60.2455	1	1	28.4	15.325	27.5167	1	1	28.4	10.88	26.3641
6946339	Chn2	NM_023543	0.606797	0.0432758	24	12	988.747	1	1	28.4	14.345	194.231	1	1	28.4	14.28	627.739
6946365	Plekha8	NM_001001335	0.606797	0.0432758	24	16	1270.88	0.474693	0.021342	26	13	1224.14	1	1	28.4	16.125	400.756
6949653	Mug2	NM_008646	0.606797	0.0432758	24	4	10976.5	0.606236	0.0343495	24.6667	3	4924.1	1	1	28.4	10.935	2561.53
6955698	Lrig1	NM_008377	0.606797	0.0432758	24	8	310.632	1	1	28.4	14.375	50.1378	1	1	28.4	11.785	233.082
6959194	9130221H12Rik	BC022632	0.606797	0.0432758	26	6	75.2362	1	1	28.4	17.565	21.2772	1	1	28.4	10.705	46.808
6962343	Nox4	NM_015760	0.606797	0.0432758	22	11	1164.6	1	0.104334	23	6.5	2025.61	1	0.0842688	32	15	1351.35
6963964	Eef2k	NM_007908	0.606797	0.0432758	26	10	125.441	0.679025	0.0432758	26	13	146.795	1	1	28.4	9.88	14.1531
6966145	Zfp36	NM_011756	0.606797	0.0432758	26	6	348.745	1	1	28.4	8.85	145.375	1	1	28.4	12.215	40.344
6968803	Wdr73	BC068122	0.606797	0.0432758	22	6	289.914	1	0.193236	18	9	165.746	1	1	28.4	12.785	74.7313
6971281	Giyd2	NM_029420	0.606797	0.0432758	22	8	462.094	1	0.193236	18	5	479.065	1	0.712712	20	19	75.5897
6971750	Dhx32	NM_133941	0.606797	0.0432758	22	5	154.574	1	1	28.4	18.665	225.826	1	1	28.4	11.565	232.04
6974039	Arhgef7	NM_001113518	0.606797	0.0432758	23.3333	15	468.199	1	1	28.4	12.425	107.494	1	0.235442	32	6	351.927
6975919	Irf2	NM_008391	0.606797	0.0432758	26	8	1846.89	1	1	28.4	15.365	153.108	1	1	28.4	12.195	230.382
6980548	E330037G11Rik	AK087889	0.606797	0.0432758	26	10	17.3948	1	1	28.4	15.805	1.87454	1	1	28.4	9.35	8.84237
6980938	Atp7b	NM_007511	0.606797	0.0432758	14	6	1657.1	1	1	28.4	8.235	556.511	1	1	28.4	10.76	380.998
6980949	Slc25a15	NM_181325	0.606797	0.0432758	24	22	10286	1	0.597883	27	13	14958.1	1	0.193236	30	29	6352.29
6988672	1500035H01Rik	BC080764	0.606797	0.0432758	23	6	1695.47	0.15381	0.00259733	24	5	2063.13	0.488427	0.00194684	30	15	1200.46
6989483	Nptn	NM_009145	0.606797	0.0432758	24	14	1186.31	1	1	28.4	12.15	391.024	1	0.712712	32	24.5	1089.51
6990525	BC031353	NM_001113283	0.606797	0.0432758	24	15	4623.21	0.11916	0.00145043	24	13	9515.47	1	1	28.4	15.83	168.607
6993128	Limd1	NM_013860	0.606797	0.0432758	23	8.5	371.974	1	0.193236	40	34	154.008	1	1	28.4	12.81	139.275
6993465	Endod1	NM_028013	0.606797	0.0432758	32	12	28.6378	1	1	28.4	17.605	20.3254	1	1	28.4	15.475	32.3208
6996267	Zwilch	NM_026507	0.606797	0.0432758	26	19	19.304	1	1	28.4	10.4	16.1213	1	1	28.4	10.895	0.64877
6996432	Aph1b	NM_177583	0.606797	0.0432758	30	18.5	232.179	1	1	28.4	10.34	87.4497	1	1	28.4	14.64	35.5544
6997671	Tmed3	NM_025360	0.606797	0.0432758	12	3	530.754	0.182667	0.00344478	24	12	510.531	1	0.193236	12	1	0
7017592	Bcap31	NM_012060	0.606797	0.0432758	26	21	5835.75	1	1	28.4	13.65	129.641	1	1	28.4	15.045	1505.5
4545225	---	---	0.678623	0.0487764	14	8	22.1324	1	0.285775	40	30	15.6271	1	0.655298	16	0	10.6066
5016914	---	---	0.678623	0.0487764	12	11	2.75772	1	1	28.4	15.595	2.16834	1	1	28.4	10.23	4.41871
6755189	Cd244	NM_018729	0.678623	0.0487764	24	1	12.8693	1	1	28.4	14.72	3.06354	1	1	28.4	17.22	3.26365
6764353	Chml	NM_021350	0.678623	0.0487764	34	17	153.584	1	1	28.4	17.04	40.4462	1	1	28.4	16.42	18.2992
6808781	Hapln1	NM_013500	0.678623	0.0487764	24	17	7.70746	0.763806	0.054277	23.3333	15.6667	28.9207	1	0.712712	28	18	8.44993
6825952	ENSMUSG00000043225	BC006743	0.678623	0.0487764	26	7	10.1116	1	0.548847	14	13	25.668	1	0.0100785	12	8	2.47487
6850349	Olfr138	NM_130868	0.678623	0.0487764	12	11	4.59619	1	1	28.4	16.475	1.96399	1	1	28.4	13.84	0.773575
6869327	I830012O16Rik	NM_001005858	0.678623	0.0487764	26	3	11.1723	1	0.260609	20	6	6.22254	1	1	28.4	11.385	2.10329
6889894	Arhgap11a	NM_181416	0.678623	0.0487764	12	11	5.37401	1	1	28.4	13.845	1.66771	1	1	28.4	11.21	4.06127
6890375	Trp53bp1	NM_013735	0.678623	0.0487764	26	2	106.49	1	0.193236	20	6.5	81.7415	1	1	28.4	10.02	114.086
6946749	Tnip3	NM_001001495	0.678623	0.0487764	10	5	8.83883	1	1	28.4	10.58	0.926663	1	1	28.4	16.67	1.69317
6965608	Dhx34	NM_027883	0.678623	0.0487764	22	7	161.574	1	1	28.4	13.485	20.7398	1	1	28.4	11.02	21.5622
7007379	Iah1	NM_026347	0.678623	0.0487764	32	16	6993.99	1	1	28.4	9.385	3814.58	1	0.193236	22	19	7823.78
4372089	---	---	0.708272	0.054277	24	23	725.704	1	0.499811	20	6	693.742	1	1	28.4	10.78	307.123
4429226	---	---	0.708272	0.054277	22	5	1734.96	1	0.104334	20	8	1235.39	1	0.285775	30	11	1863.37
4600275	---	---	0.708272	0.054277	22	16	768.484	1	1	28.4	11.485	228.696	1	1	28.4	11.425	210.401
4811855	---	---	0.708272	0.054277	14	12	217.011	1	1	28.4	17.335	35.8892	1	1	28.4	13.46	33.245
4818495	---	---	0.708272	0.054277	24	23	1333.82	0.15381	0.00259733	22	2	1246.28	1	1	28.4	9.99	272.645
4819021	---	---	0.708272	0.054277	22	8	2194.93	1	1	28.4	12.085	725.54	1	0.499811	20	0.5	1193.24
4875334	---	---	0.708272	0.054277	24	4	580.676	1	0.416347	38	4	225.991	1	1	28.4	10.96	243.583
5035822	---	---	0.708272	0.054277	12	2	118.228	1	1	28.4	12.7	108.93	1	1	28.4	13.73	23.9692
5168035	---	---	0.708272	0.054277	12	11	150.543	0.540748	0.0271394	12	8	100.975	1	1	28.4	17.71	48.3905
5213282	---	---	0.708272	0.054277	26	14	6749.19	1	1	28.4	10.085	1020.97	1	1	28.4	12.935	173.077
5351902	---	---	0.708272	0.054277	20	11	99.7728	1	0.846691	22	8	179.393	1	1	28.4	13.915	32.4566
5429742	---	---	0.708272	0.054277	32	26	832.618	1	0.712712	40	34	1341.81	1	1	28.4	9.8	1191.42
5430153	---	---	0.708272	0.054277	22	10	1640.35	1	0.345572	26	8	594.96	1	1	28.4	15.89	284.425
5463723	---	---	0.708272	0.054277	26	24	1256.32	1	0.15798	20	3	1300.86	1	1	28.4	9.52	235.653
5481784	---	---	0.708272	0.054277	16	14	0.282843	1	1	28.4	13.87	0.31643	1	1	28.4	15.365	0.637457
5534749	---	---	0.708272	0.054277	38	9	13.2229	1	1	28.4	11.225	6.76524	1	1	28.4	13.255	3.64443
5577121	---	---	0.708272	0.054277	22	14	2234.95	1	0.499811	28	9.5	2721.76	1	1	28.4	14.975	1479.55
6750009	Creb1	NM_133828	0.708272	0.054277	26	18	2198.89	1	1	28.4	11.805	546.642	0.627918	0.00344478	36	27	2398.72
6753417	Kif21b	NM_001039472	0.708272	0.054277	25	9	29.3096	1	1	28.4	14.285	3.85338	1	1	28.4	17.6	0.364867
6757974	6330578E17Rik	NM_198006	0.708272	0.054277	28	12	5082.33	1	0.416347	28	7	1505.08	1	1	28.4	11.25	1285.93
6761139	Rnf152	NM_178779	0.708272	0.054277	22	8	1529.97	0.0732044	0.000577302	22	4	1774.2	0.201655	0.000216072	28	13	697.702
6764011	Uap1	NM_133806	0.708272	0.054277	12	2	0	0.13439	0.00194684	24	13	1962.5	1	1	28.4	17.225	1187.33
6769193	Midn	NM_021565	0.708272	0.054277	24	7	858.71	1	1	28.4	12.085	140.939	1	1	28.4	10.1	264.381
6769286	Dohh	NM_133964	0.708272	0.054277	22	12	530.896	1	0.285775	26	11.5	272.024	1	1	28.4	16.345	137.76
6771527	Avil	NM_009635	0.708272	0.054277	12	5	1.55563	1	1	28.4	12.195	1.43472	1	1	28.4	16.31	4.28082
6772417	Tnfaip3	NM_009397	0.708272	0.054277	12	5.5	53.033	1	1	28.4	12.12	18.6704	1	1	28.4	12.43	19.6752
6775159	Smarcb1	NM_011418	0.708272	0.054277	22	4	298.682	1	1	28.4	11.055	40.1333	1	1	28.4	10.06	320.2
6775430	Pias4	NM_021501	0.708272	0.054277	30	29	169.493	1	1	28.4	13.8	13.2986	1	0.597883	12	2.5	100.692
6781941	Myh10	NM_175260	0.708272	0.054277	24	3	193.606	0.24129	0.00595676	22	4	79.4081	1	0.285775	30	11	129.966
6781982	Vamp2	NM_009497	0.708272	0.054277	24	10	655.347	1	1	28.4	17.785	68.5126	1	1	28.4	11.185	177.083
6782368	1300001I01Rik	BC072573	0.708272	0.054277	24	3	12607.9	1	1	28.4	8.97	1795.02	1	0.285775	34	3	5200.2
6782572	Git1	NM_001004144	0.708272	0.054277	22	9	165.109	1	1	28.4	11.635	36.1915	1	1	28.4	8.365	52.316
6785758	Camk2b	NM_007595	0.708272	0.054277	24	11	67.2459	1	1	28.4	14.18	14.4366	1	1	28.4	11.765	6.29184
6786049	Cobl	NM_172496	0.708272	0.054277	22	11	570.069	1	0.416347	26	7	539.947	1	1	28.4	13.83	191.963
6788991	Hs3st3b1	NM_018805	0.708272	0.054277	26	10	1456.43	1	1	28.4	10.945	292.299	1	1	28.4	10.085	440.014
6789805	Gemin4	NM_177367	0.708272	0.054277	20	15	498.086	0.474693	0.021342	20	13	483.237	1	0.499811	26	1	455.023
6789939	Traf4	NM_009423	0.708272	0.054277	24	11	669.064	1	1	28.4	11.73	333.961	1	1	28.4	14.09	7.05127
6791298	Top2a	NM_011623	0.708272	0.054277	22	0	23.4759	1	1	28.4	12.135	8.61397	1	1	28.4	14.28	0.901915
6791316	Smarce1	NM_020618	0.708272	0.054277	26	23	1720.96	1	0.104334	18	8	327.39	1	1	28.4	11.735	272.81
6794063	Adi1	NM_134052	0.708272	0.054277	26	10	1501.75	1	0.345572	16	6	1386.21	1	1	28.4	8.975	636.446
6796564	Acot4	NM_134247	0.708272	0.054277	26	17	3403.66	1	1	28.4	12.58	0	1	1	28.4	17.285	487.04
6803918	Nudt14	NM_025399	0.708272	0.054277	26	12	462.377	1	1	28.4	12.235	123.443	1	1	28.4	14.45	362.432
6806444	Tmem14c	NM_025387	0.708272	0.054277	22	19	12713	1	1	28.4	17.395	563.39	1	1	28.4	12.245	5503.5
6813078	Phf2	NM_011078	0.708272	0.054277	26	4	168.786	1	1	28.4	10.575	56.845	1	1	28.4	9.935	100.948
6820219	P2ry5	NM_175116	0.708272	0.054277	21	11.5	1579.39	1	0.597883	18	7	260.145	1	1	28.4	15.73	74.5828
6820323	5031414D18Rik	NM_198642	0.708272	0.054277	22	12	20.5768	1	1	28.4	11.885	2.10117	1	1	28.4	14.96	1.82292
6822469	Acox2	NM_053115	0.708272	0.054277	22	3	4436.81	1	0.499811	22	12	7679.25	1	0.0167025	22	21	5296.44
6825402	Extl3	NM_018788	0.708272	0.054277	24	8	389.05	1	1	28.4	12.87	164.756	1	1	28.4	9.095	200.295
6829361	Tiaf2	AF075717	0.708272	0.054277	24	13.5	131.168	1	1	28.4	12.415	0	1	1	28.4	13.22	37.0167
6836838	Cpsf1	NM_053193	0.708272	0.054277	23	4	572.12	1	1	28.4	9.73	112.359	1	1	28.4	10.735	105.829
6844177	Mcm4	NM_008565	0.708272	0.054277	22	21	214.465	1	1	28.4	14.5	43.7703	1	1	28.4	9.88	26.7838
6844334	Comt1	NM_001111062	0.708272	0.054277	24	3	9578.26	1	0.499811	24	0	17078.8	1	1	28.4	11.25	10290.4
6848479	Zdhhc14	NM_146073	0.708272	0.054277	24	15	39.8101	0.839358	0.067776	28	12	71.0642	1	1	28.4	15.405	50.9453
6850204	Ppp1r10	NM_175934	0.708272	0.054277	22	18	2115.88	1	1	28.4	15.875	474.32	1	0.128645	24	4.5	2254.79
6851210	Tnfaip8l1	NM_025566	0.708272	0.054277	22	6	1173.02	1	0.128645	24	3.5	2229.3	1	1	28.4	11.545	773.871
6854999	Ring1	NM_009066	0.708272	0.054277	26	5	182.858	1	1	28.4	11.345	15.8968	1	0.345572	36.6667	4	132.111
6858247	Acat3	NM_153151	0.708272	0.054277	20	5	14.2128	1	1	28.4	10.97	103.288	1	1	28.4	10.84	75.74
6865926	Ndst1	NM_008306	0.708272	0.054277	14	5	8882.96	0.763806	0.054277	22	4	11863.2	1	0.416347	30	11	2335.36
6867776	Rela	NM_009045	0.708272	0.054277	25	5	1165.03	1	1	28.4	17.09	95.4301	1	0.597883	34	3	664.185
6871156	Frmd8	NM_026169	0.708272	0.054277	24	10.5	498.899	0.420845	0.0167025	22	12	405.384	1	1	28.4	11.015	34.6026
6871267	Plcb3	NM_008874	0.708272	0.054277	26	2	157.261	1	1	28.4	11.385	27.8377	1	1	28.4	9.285	87.5274
6873393	Ldb1	NM_010697	0.708272	0.054277	26	9	742.462	0.679025	0.0432758	20	10	214.183	1	1	28.4	13.365	125.992
6879637	Lmo2	NM_008505	0.708272	0.054277	20	6	182.363	1	1	28.4	15.675	69.754	1	1	28.4	13.57	0
6881252	D430028G21Rik	NM_144888	0.708272	0.054277	23	16	7720.72	0.13439	0.00194684	24	13	4431.86	1	0.0343495	24	5	10323.8
6883113	Dnttip1	NM_133763	0.708272	0.054277	14	7	264.104	1	0.345572	24	4	332.552	1	1	28.4	10.11	162.06
6885951	2610528K11Rik	BC059907	0.708272	0.054277	24	9	13.2936	1	1	28.4	12.76	9.27123	1	0.104334	40	7.5	13.1522
6890802	Zc3h8	NM_020594	0.708272	0.054277	24	14.5	53.9876	1	0.128645	12	8.5	57.2049	1	1	28.4	15.525	20.8119
6897002	Plk4	NM_011495	0.708272	0.054277	24	1	14.0714	1	0.104334	18	9	6.45824	1	0.712712	18	5	0
6899152	Rit1	NM_009069	0.708272	0.054277	24	3	328.946	0.325243	0.0100785	22	2	490.237	1	1	28.4	9.755	122.896
6899510	Tchhl1	NM_027762	0.708272	0.054277	26	17	11.3137	1	0.655298	24	16	8.27315	1	0.548847	34	22	7.35391
6899791	Gja5	NM_008121	0.708272	0.054277	24	23	9.2631	1	0.193236	28	4	30.9006	1	0.054277	34	28	11.1016
6903454	Cyp7b1	NM_007825	0.708272	0.054277	20	15	17699.7	1	1	28.4	17.68	13584.8	1	1	28.4	12.015	7572.35
6908528	Palmd	NM_023245	0.708272	0.054277	24	7	1758.08	0.606236	0.0343495	20	6	442.083	1	1	28.4	11.205	80.8439
6909434	Sgms2	NM_028943	0.708272	0.054277	22	6	4850.89	0.182667	0.00344478	24	1	3930.88	1	0.345572	30	11	2212.11
6915873	Tctex1d1	NM_026100	0.708272	0.054277	34	33	22.8395	1	1	28.4	11.89	4.68635	1	1	28.4	14.275	5.60559
6917270	Ak2	NM_016895	0.708272	0.054277	22	13	6128.85	0.474693	0.021342	18	9	4169.17	1	0.597883	10	3	4560.27
6917441	Sfrs4	NM_020587	0.708272	0.054277	24	11	1098.91	1	0.345572	25	6.5	1125.78	1	1	28.4	12.47	6.91833
6921131	B230312A22Rik	BC046771	0.708272	0.054277	27	6.5	139.795	1	0.104334	22	10	101.611	1	0.0130072	38	17	134.492
6923526	Cyp2j5	NM_010007	0.708272	0.054277	26	23	15148.8	1	1	28.4	16.56	3578.3	1	1	28.4	11.03	24.3308
6926084	Npal3	NM_028995	0.708272	0.054277	26	25	170.696	0.420845	0.0167025	24	1	278.247	1	1	28.4	10.6	109.939
6926330	2310028O11Rik	BC055791	0.708272	0.054277	22	19	9405.65	1	1	28.4	11.91	2678.8	1	1	28.4	16.22	737.29
6926916	Tardbp	NM_145556	0.708272	0.054277	26	23	3032.99	0.11916	0.00145043	24	21	1159.44	1	0.0271394	26	5	2504.15
6933328	Tmem175	NM_028223	0.708272	0.054277	25	2.5	296.914	1	1	28.4	12.34	0	1	1	28.4	9.655	61.3458
6933627	Oasl1	NM_145209	0.708272	0.054277	26	24	890.884	1	0.345572	14	10.5	1246.84	1	1	28.4	9.715	369.728
6935117	Ap4m1	NM_021392	0.708272	0.054277	22	6	555.574	0.474693	0.021342	22	7	347.614	1	1	28.4	11.85	48.7267
6941193	Alkbh2	NM_175016	0.708272	0.054277	22	10	190.636	1	0.380959	22	9	133.643	1	1	28.4	17.85	48.5203
6942377	Gtf2i	NM_001080746	0.708272	0.054277	24	6	2772.35	1	1	28.4	14.24	482.118	1	1	28.4	11.135	434.368
6945032	Smo	NM_176996	0.708272	0.054277	24	3	74.5998	0.0630733	0.000419011	30	4	296.066	1	1	28.4	11.94	80.7848
6952436	Tsga14	NM_031998	0.708272	0.054277	24	3.5	150.684	1	1	28.4	11.73	0	1	1	28.4	10.405	48.528
6956012	Pdzrn3	NM_018884	0.708272	0.054277	22	10	96.3079	1	1	28.4	13.49	34.2243	1	0.712712	30	16	153.442
6956727	Raf1	NM_029780	0.708272	0.054277	12	7	2905.64	1	0.712712	20	3.5	985.813	1	1	28.4	9.705	1401.6
6967969	Lrrk1	NM_146191	0.708272	0.054277	26	8	239.002	1	1	28.4	11.485	69.6256	1	1	28.4	10.615	49.5745
6968781	Furin	NM_001081454	0.708272	0.054277	24	12	2969.07	0.279725	0.00776882	28	9	2749.58	1	1	28.4	10.45	904.696
6970744	Plekha7	NM_172743	0.708272	0.054277	24	11.5	112.147	1	1	28.4	11.985	17.6469	1	1	28.4	11.585	15.9018
6974850	Eif4ebp1	NM_007918	0.708272	0.054277	24	13	1157.96	1	0.235442	26	5	2022.75	1	0.235442	24	21.5	965.201
6977696	Asf1b	NM_024184	0.708272	0.054277	22	20	139.866	1	1	28.4	14.63	3.25446	1	1	28.4	16.575	30.2649
6977993	Nkd1	NM_027280	0.708272	0.054277	26	5	252.225	1	1	28.4	14.895	65.9999	1	1	28.4	13.045	60.2133
6979721	Rhou	NM_133955	0.708272	0.054277	24	2	2285.44	1	0.285775	18	6	1463.57	1	1	28.4	14.425	69.7876
6983199	Uba52	NM_019883	0.708272	0.054277	22	12.5	1973.99	1	0.416347	14	10	1180.8	1	0.021342	39	17	1073.28
6983793	Pkn1	NM_177262	0.708272	0.054277	22	8	346.836	1	1	28.4	11.97	114.244	1	1	28.4	8.85	57.8244
6985328	Il34	NM_029646	0.708272	0.054277	30	12	103.945	1	0.193236	21	15	38.2191	1	1	28.4	15.775	14.9489
6992224	Hyal1	NM_008317	0.708272	0.054277	24	20	9107.78	0.325243	0.0100785	24	15	7288.01	0.924807	0.00776882	26	6	2893.55
6992409	Nme6	NM_018757	0.708272	0.054277	12	3	216.375	0.0990341	0.00107387	24	12	495.328	1	1	28.4	15.48	153.93
6992452	Ccdc12	NM_028312	0.708272	0.054277	10	5	47.659	1	1	28.4	9.985	17.2039	1	1	28.4	16.585	20.7419
6992887	Endogl1	NM_172456	0.708272	0.054277	21	11.5	84.9942	0.540748	0.0271394	24	13	69.5793	1	1	28.4	12.155	32.6789
6995968	Loxl1	NM_010729	0.708272	0.054277	24	4	43.5578	1	0.597883	14	2	63.9932	1	1	28.4	14.085	15.3523
6996440	Rab8b	NM_173413	0.708272	0.054277	22	0	336.159	1	1	28.4	13.27	53.5054	1	1	28.4	14.23	51.0308
6996667	Lipc	NM_008280	0.708272	0.054277	22	4	4670.86	0.211129	0.00454255	20	6	2054.36	1	1	28.4	11.135	228.742
6999449	Axud1	NM_153287	0.708272	0.054277	24	12.5	102.566	0.474693	0.021342	24	12	206.404	1	1	28.4	15.08	17.6646
7009947	Mid1ip1	NM_026524	0.708272	0.054277	22	15	2519.35	1	0.193236	24	15	4464.96	1	1	28.4	13.06	1203.48
7014855	Phka2	NM_172783	0.708272	0.054277	24	5	846.478	0.0434602	0.000216072	23	4.5	1381.16	1	0.0271394	30	13.5	1603.22
4542961	---	---	0.790161	0.0610265	22	10	1.76777	1	0.499811	36	9	0.636396	1	1	28.4	13.795	0.382898
4773020			0.790161	0.0610265	36	7	7.70746	1	1	28.4	12.995	6.11223	1	1	28.4	9.26	9.5668
6775316	BC005764	NM_181681	0.790161	0.0610265	14	13	87.752	1	1	28.4	14.365	9.65095	1	0.846691	18	12	13.2229
6792302	Cpsf4l	BC004603	0.790161	0.0610265	23.3333	10.6667	89.8026	1	1	28.4	11.475	4.13905	1	1	28.4	12.67	37.8946
6819602	Arl11	NM_177337	0.790161	0.0610265	18	9.5	68.7308	1	1	28.4	10.385	30.8419	1	1	28.4	18.095	24.66
6828034	4931432E15Rik	AK016500	0.790161	0.0610265	40	28	5.16188	1	1	28.4	9.79	0.563211	1	1	28.4	11.83	1.2286
6868091	Ms4a4c	NM_029499	0.790161	0.0610265	26	2	14.1421	1	0.499811	20	5	5.51543	1	0.712712	28	12	4.59619
6871568	Ms4a2	NM_013516	0.790161	0.0610265	10	1	1.13137	1	1	28.4	15.35	0.171473	1	1	28.4	8.815	1.2042
6872489	4430402I18Rik	NM_198651	0.790161	0.0610265	24	0	69.8621	1	1	28.4	11.59	0.467751	1	1	28.4	8.4	10.7378
6874000	Afap1l2	NM_146102	0.790161	0.0610265	22	4	50.6996	1	0.260609	31	14.5	38.0423	1	1	28.4	15.475	2.40452
6947895	V1rb7	NM_053228	0.790161	0.0610265	14	12	6.22254	1	1	28.4	12.065	0.208243	1	0.548847	20	2	1.76777
6956763	Olfr215	NM_146446	0.790161	0.0610265	22	11	56.4271	1	1	28.4	11.805	4.85287	1	1	28.4	14.165	5.70105
6969959	Olfr577	NM_147109	0.790161	0.0610265	12	7	5.65685	1	1	28.4	16.035	5.71307	1	1	28.4	18.535	4.88752
6972274	Krtap5-2	NM_027844	0.790161	0.0610265	34	5.5	7.35391	0.839358	0.067776	38	6	4.94975	1	0.235442	16	15	14.0007
4364013	---	---	0.820628	0.067776	30	13	712.057	1	1	28.4	12.665	142.721	1	1	28.4	14.58	165.348
4419153	---	---	0.820628	0.067776	24	17.5	190.919	1	1	28.4	10.59	16.9681	1	1	28.4	15.96	11.9773
4453298	---	---	0.820628	0.067776	32	15	16.0513	1	1	28.4	7.99	12.5366	1	1	28.4	11.37	19.0176
4560921	---	---	0.820628	0.067776	32	27	12.0208	1	1	28.4	11.595	5.25486	1	0.128645	40	9	93.4795
4568110	---	---	0.820628	0.067776	22	2	31.6784	1	1	28.4	15.185	17.6872	1	1	28.4	13.35	14.7799
4623939	---	---	0.820628	0.067776	20	2	618.648	1	1	28.4	18.48	386.665	1	1	28.4	10.145	391.776
4639026	---	---	0.820628	0.067776	22	11	58.407	1	1	28.4	12.185	50.2159	1	1	28.4	17.285	58.5863
4715728	---	---	0.820628	0.067776	24	7	273.933	1	0.285775	30	6	392.939	1	0.0271394	38	2	435.436
4719998	---	---	0.820628	0.067776	22	13	221.749	1	1	28.4	10.735	67.4979	1	1	28.4	10.95	34.9155
4812994	---	---	0.820628	0.067776	18	17	422.001	1	1	28.4	13.07	125.644	1	1	28.4	11.03	103.871
4829328	---	---	0.820628	0.067776	16	4	541.432	1	1	28.4	12.97	95.5093	1	1	28.4	11.495	191.186
4973303	---	---	0.820628	0.067776	24	13	171.261	1	1	28.4	12.64	138.968	1	1	28.4	8.89	75.472
4992150	---	---	0.820628	0.067776	24	6.5	83.6507	1	1	28.4	10.775	21.9486	1	1	28.4	10.055	48.3802
5051576	---	---	0.820628	0.067776	16	5	93.8331	1	1	28.4	16.705	72.0917	1	0.712712	40	19.5	131.875
5096074	---	---	0.820628	0.067776	24	12	4899.19	0.474693	0.021342	22	11	6144.76	1	1	28.4	14.265	522.4
5111273	---	---	0.820628	0.067776	24	23	3109.15	1	1	28.4	13.265	1383.27	1	1	28.4	14.61	471.365
5231739	---	---	0.820628	0.067776	26	9.5	8028.91	0.606236	0.0343495	22	4	5752.31	1	1	28.4	14.335	1293.16
5286620	---	---	0.820628	0.067776	22	14	13634.3	1	1	28.4	10.26	1279.03	1	1	28.4	16.12	1405.22
5393997	---	---	0.820628	0.067776	16	3	10.9602	1	1	28.4	12.43	1.5871	1	0.924583	32	23.5	9.19239
5499437	---	---	0.820628	0.067776	20	14	36.8403	1	1	28.4	14.835	11.1348	1	1	28.4	12.085	0
6748525	Dst	NM_134448	0.820628	0.067776	24	14	50.346	1	1	28.4	11.03	40.9259	1	1	28.4	9.675	21.63
6750440	Igfbp2	NM_008342	0.820628	0.067776	18	9.5	19417.5	1	0.416347	36	4.5	9077.77	1	1	28.4	14.7	2263.81
6751304	Dis3l2	NM_153530	0.820628	0.067776	24	9	644.669	1	0.235442	24	6	241.406	1	0.104334	34	14	620.557
6751349	Dgkd	BC048957	0.820628	0.067776	24	12	285.035	1	1	28.4	10.995	83.6235	1	1	28.4	14.4	37.7535
6753085	Nucks1	NM_175294	0.820628	0.067776	22	18	3782.03	0.420845	0.0167025	28	14.5	4626.88	1	1	28.4	14.45	55.5956
6755227	Wdr42a	NM_153555	0.820628	0.067776	24	8	4281.89	0.279725	0.00776882	22	6	2035.97	1	0.285775	36	14	3878.06
6755315	Olfr414	NM_146761	0.820628	0.067776	16	13	15.4149	1	1	28.4	14.27	0.819183	1	1	28.4	17.495	2.33734
6755853	Capn8	NM_130890	0.820628	0.067776	20	18	143.189	1	1	28.4	18.685	14.717	1	1	28.4	12.17	21.5424
6756625	Mrpl15	NM_025300	0.820628	0.067776	24	22	1184.05	1	0.416347	30	18.5	913.688	1	1	28.4	9.82	122.385
6758450	Slc39a10	NM_172653	0.820628	0.067776	24	21	447.881	0.325243	0.0100785	26	15	369.534	1	0.416347	28	0.5	522.976
6758704	Pgap1	ENSMUST00000094950	0.820628	0.067776	22	13	136.613	1	1	28.4	13.66	17.3326	1	1	28.4	16.165	20.8321
6758993	Mpp4	NM_145143	0.820628	0.067776	24	19.5	61.094	1	0.499811	26	14	86.3377	1	0.0432758	24	6	66.6802
6759021	Sumo1	NM_009460	0.820628	0.067776	28	13.5	470.933	1	1	28.4	12.06	60.8299	1	1	28.4	11	136.567
6764046	Pcp4l1	NM_025557	0.820628	0.067776	24	19	317.35	1	1	28.4	14.705	44.0238	0.627918	0.00344478	28	27	126.36
6771608	Rdh20	NM_027301	0.820628	0.067776	22	2	1926.58	1	1	28.4	17.995	1000.71	1	1	28.4	11.525	2710.54
6773546	Lace1	NM_145743	0.820628	0.067776	24	19	226.274	0.540748	0.0271394	26	16	450.71	1	1	28.4	14.095	0
6778055	Cdk2	NM_183417	0.820628	0.067776	22	10	410.9	1	0.416347	20.6667	8	854.326	1	0.846691	34	14	673.873
6778358	Sec14l4	NM_146013	0.820628	0.067776	24	16	5729.69	0.0376854	0.000153442	26	11.5	7318.41	1	1	28.4	13.02	1621.33
6780782	Mgat4b	NM_145926	0.820628	0.067776	24	9.5	473.443	1	0.416347	14	8	318.41	1	0.0432758	22	20	240.204
6781472	Dhrs7b	NM_145428	0.820628	0.067776	34	19	1092.06	1	1	28.4	16.535	200.508	1	1	28.4	13.75	122.446
6781727	Elac2	NM_023479	0.820628	0.067776	22	9	477.085	1	1	28.4	11.14	195.98	1	1	28.4	9.685	148.862
6783054	Hnf1b	NM_009330	0.820628	0.067776	26	25	791.323	0.606236	0.0343495	20	6	719.552	1	1	28.4	11.87	129.33
6783321	2011-09-04	NM_011129	0.820628	0.067776	26	25	263.327	1	1	28.4	17.29	87.6056	1	1	28.4	12.14	134.866
6783917	Mllt6	NM_139311	0.820628	0.067776	28	9	67.0337	1	0.712712	22	8	82.7315	1	1	28.4	11.68	5.59286
6785409	2810410L24Rik	ENSMUST00000070897	0.820628	0.067776	36	27	15.5563	1	0.924583	14	6	29.3449	1	1	28.4	13.295	10.6402
6785762	Nudcd3	NM_173748	0.820628	0.067776	24	12	298.399	1	0.15798	26	9	526.158	1	1	28.4	11.71	190.961
6785936	Sunc1	NM_177576	0.820628	0.067776	12	9	4.80833	1	1	28.4	12.425	0.94823	1	1	28.4	14.125	2.68135
6789977	Tmem97	NM_133706	0.820628	0.067776	25	13	3851.33	1	1	28.4	15.44	310.366	1	1	28.4	11.085	806.393
6790684	Pctp	NM_008796	0.820628	0.067776	22	6	6300.25	1	1	28.4	12.135	695.586	1	1	28.4	11.62	1018.34
6791820	1700052K11Rik	BC099431	0.820628	0.067776	16	10	0	1	1	28.4	16.575	86.0231	1	1	28.4	11.945	100.854
6792421	Fads6	NM_178035	0.820628	0.067776	26	10	1789.9	1	1	28.4	11.05	524.093	1	1	28.4	11.715	1183.89
6795794	Atp5s	NM_026536	0.820628	0.067776	24	6	7.21249	1	1	28.4	13.1	47.8312	0.741167	0.00454255	30	14	135.623
6807251	Tmed9	NM_026211	0.820628	0.067776	12	3	809.354	0.24129	0.00595676	24	13	1349.16	1	1	28.4	15.125	300.303
6810592	Fgf10	NM_008002	0.820628	0.067776	36	30	8.41457	1	1	28.4	15.8	2.22173	1	1	28.4	16.1	1.54043
6813332	Rnf44	NM_134064	0.820628	0.067776	22	9	368.685	1	1	28.4	9.38	117.71	1	1	28.4	10.765	235.148
6814385	Pdcd6	NM_011051	0.820628	0.067776	24	12	4484.05	1	1	28.4	13.095	1064.31	1	0.499811	32	15.6667	3596.77
6815698	Nln	NM_029447	0.820628	0.067776	24	13	1330.42	1	1	28.4	12.085	254.443	1	0.128645	40	15	966.686
6818920	Olfr741	NM_207133	0.820628	0.067776	10	6	15.0614	1	1	28.4	14.9	2.24365	1	1	28.4	12.01	0.799031
6819249	Wdr23	NM_133734	0.820628	0.067776	23	4	5323.67	1	1	28.4	13.945	2006.26	1	1	28.4	9.75	2752.99
6819425	Mrp63	NM_026401	0.820628	0.067776	10	1	816.284	1	1	28.4	13.36	300.153	1	0.846691	12	0	606.627
6831891	Maff	NM_010755	0.820628	0.067776	24	11	70.8521	1	1	28.4	15.185	0	1	1	28.4	17.255	7.83969
6833306	Acvr1b	NM_007395	0.820628	0.067776	28	7	386.929	1	1	28.4	10.045	198.76	1	1	28.4	9.74	80.4949
6839502	Mkl2	NM_181860	0.820628	0.067776	22	19	1429.77	1	1	28.4	11.745	123.757	1	1	28.4	14.395	60.429
6845366	Dirc2	NM_153550	0.820628	0.067776	24	4	1921.99	1	1	28.4	13.99	1106.39	1	1	28.4	13.365	396.008
6848854	4932442K08Rik	NM_024203	0.820628	0.067776	24	12	150.472	1	1	28.4	12.19	19.9181	1	1	28.4	11.125	18.1564
6859837	Wdr36	NM_001110015	0.820628	0.067776	30.6667	14	993.956	1	1	28.4	12.56	309.106	1	0.846691	12	1	443.215
6859942	Pkd2l2	NM_016927	0.820628	0.067776	26	21	2.12132	1	1	28.4	10.99	0.0972272	1	0.597883	20	0	0.212132
6862459	Txnl4a	NM_025299	0.820628	0.067776	23	19.5	127.88	1	0.15798	24	16	209.516	1	1	28.4	15.085	0
6864509	2610024E20Rik	BC031465	0.820628	0.067776	24	22	1169.55	1	0.712712	29	17	561.973	1	1	28.4	13.45	315.438
6869068	Il33	NM_133775	0.820628	0.067776	20	18	4.94975	1	1	28.4	11.7	10.8134	1	1	28.4	11.3	9.87369
6871277	Stip1	NM_016737	0.820628	0.067776	24	19	11289.1	0.0128763	1.65562e-05	24	16	8043.55	1	0.0100785	26	4	9422.41
6878469	Ssfa2	NM_080558	0.820628	0.067776	24	13	1310.41	1	1	28.4	12.36	345.713	1	1	28.4	16.15	543.519
6878904	Olfr1204	NM_146463	0.820628	0.067776	32	10	3.60624	1	1	28.4	16.06	1.33219	1	1	28.4	15.115	4.97061
6880040	2900064A13Rik	BC115477	0.820628	0.067776	32	19	4113.59	1	0.285775	16	9	1875.6	1	1	28.4	15.06	1261.42
6881172	Nol5a	NM_024193	0.820628	0.067776	22	17	1858.28	0.13439	0.00194684	24	12	1723.86	1	0.416347	28	26	1629.81
6882878	Top1	NM_009408	0.820628	0.067776	12	3	1329.43	1	0.285775	28.6667	15.3333	3057.27	1	1	28.4	15.96	601.493
6885803	Tor1a	NM_144884	0.820628	0.067776	24	13	2798.73	1	1	28.4	13.4	554.975	1	0.499811	24	23	939.109
6886142	Dennd1a	NM_146122	0.820628	0.067776	24	5	522.976	1	0.846691	20	6	375.615	1	1	28.4	9.685	321.277
6890702	Zfp661	NM_028141	0.820628	0.067776	22	21	124.451	1	1	28.4	16.97	39.2826	1	1	28.4	11.46	17.7912
6892505	Rbl1	NM_011249	0.820628	0.067776	22	0	296.843	1	1	28.4	11.215	31.532	1	0.712712	12	1	176.494
6892984	Ncoa5	NM_144892	0.820628	0.067776	22	0	240.346	1	0.193236	30	13	126.501	1	0.0432758	28	4.5	178.191
6893486	Aurka	NM_011497	0.820628	0.067776	20	2	92.5603	1	1	28.4	14.805	9.85	1	0.779701	14	8	20.5061
6896519	Skil	NM_011386	0.820628	0.067776	24	20	831.275	1	0.15798	28	13.5	401.707	1	0.846691	30	27	1029.9
6900193	Rhoc	NM_007484	0.820628	0.067776	24.6667	6.33333	319.707	1	1	28.4	11.935	134.18	1	1	28.4	10.965	52.1109
6903875	Evi1	NM_007963	0.820628	0.067776	26	20	20.0111	1	1	28.4	12.075	7.08839	1	0.054277	28	6	49.0732
6913975	Bspry	NM_138653	0.820628	0.067776	20	9	27.6479	1	1	28.4	16.94	19.228	1	1	28.4	16.95	7.63852
6918577	LOC433762	AY140896	0.820628	0.067776	22	15	224.86	1	1	28.4	17.725	22.8459	1	0.499811	30	27	76.0493
6924358	Cpt2	NM_009949	0.820628	0.067776	36	20	2657.87	1	0.345572	24	17	4762.01	1	0.499811	32	0	8074.66
6924873	Ipo13	NM_146152	0.820628	0.067776	22	15	278.247	0.474693	0.021342	24	13	375.827	1	1	28.4	13.555	145.118
6925776	Epb4.1	NM_183428	0.820628	0.067776	24	12.5	273.827	1	1	28.4	16.48	415.311	1	1	28.4	9.71	157.592
6926116	Pnrc2	NM_026383	0.820628	0.067776	26	24.5	15846	0.679025	0.0432758	22	2	7026.66	1	1	28.4	13.28	683.844
6926419	D4Ertd22e	NM_001025608	0.820628	0.067776	20	3	979.131	1	1	28.4	11.28	302.961	1	1	28.4	15.79	157.566
6932469	Uso1	NM_019490	0.820628	0.067776	12	3	2144.02	0.474693	0.021342	24	13	4480.44	1	1	28.4	16.945	1581.79
6935904	Gatad1	NM_026033	0.820628	0.067776	26	14	1590.5	0.474693	0.021342	30	10	859.418	1	1	28.4	15.935	40.1021
6936575	Napepld	NM_178728	0.820628	0.067776	24	19	25.4558	1	1	28.4	13.585	1.59382	1	1	28.4	9.225	6.044
6942524	Serpine1	NM_008871	0.820628	0.067776	24	9	33.8704	1	1	28.4	14.655	2.79731	1	1	28.4	17.195	2.84257
6942737	Ttyh3	NM_175274	0.820628	0.067776	26	10	215.385	1	1	28.4	11.2	57.6776	1	1	28.4	16.79	30.0358
6946403	C330043M08Rik	BC118940	0.820628	0.067776	24	12	32.3148	1	1	28.4	10.265	10.1399	1	1	28.4	12.645	7.17324
6947894	Txnrd3	NM_153162	0.820628	0.067776	22	8	266.084	0.679025	0.0432758	20	7	193.464	1	0.499811	32	13	50.0632
6949814	Cdca3	NM_013538	0.820628	0.067776	32	24	36.7696	1	1	28.4	11.56	13.0334	1	1	28.4	15.81	3.49876
6957178	Plekhg6	NM_198604	0.820628	0.067776	26	6	207.489	0.839358	0.067776	24	4	194.808	1	1	28.4	10.4	48.5277
6957217	Ntf3	NM_008742	0.820628	0.067776	26	14	91.9946	1	0.345572	16	10	47.659	1	1	28.4	13.565	13.8066
6957316	Tspan9	NM_175414	0.820628	0.067776	24	3	395.131	1	1	28.4	9.53	248.572	1	1	28.4	10.64	86.2013
6957343	Itfg2	NM_133927	0.820628	0.067776	24	6	95.8837	1	0.416347	26	12	215.031	1	0.285775	20	3	138.734
6957654	Gpr19	NM_008157	0.820628	0.067776	14	5	124.734	1	1	28.4	13.99	0	1	1	28.4	8.72	27.2554
6959305	Sertad1	NM_018820	0.820628	0.067776	24	13.5	234.901	1	0.499811	26	9	78.4889	1	0.067776	30	26	108.541
6960375	Gys1	NM_030678	0.820628	0.067776	20	0	48.154	0.13439	0.00194684	26	13	161.998	1	1	28.4	15.355	25.2151
6963267	Olfml1	NM_172907	0.820628	0.067776	24	13	320.178	1	0.416347	18	7	307.309	1	0.597883	35.3333	14.6667	899.346
6964299	Prr14	NM_145589	0.820628	0.067776	24	5	580.11	1	1	28.4	12.46	100.76	1	1	28.4	10.255	251.405
6969947	Trim68	NM_198012	0.820628	0.067776	26	2	45.8912	1	1	28.4	13.75	17.7151	1	0.15798	26	13	51.0531
6973688	2310057J16Rik	BC048787	0.820628	0.067776	14	5	418.89	1	1	28.4	9.37	103.72	1	1	28.4	10.025	87.5936
6975851	Mtnr1a	NM_008639	0.820628	0.067776	24	2	124.451	0.182667	0.00344478	25	3	131.487	1	1	28.4	11.85	11.3731
6976609	Ddx60	NM_001081215	0.820628	0.067776	26	3	332.482	0.839358	0.067776	20	6	11.3137	1	0.499811	26	14	155.705
6977032	Rab3a	NM_009001	0.820628	0.067776	26	10	54.8715	1	0.15798	26	10	45.6084	1	1	28.4	11.58	34.2957
6977261	Mcm5	NM_008566	0.820628	0.067776	26	16	167.443	1	1	28.4	11.28	32.8016	1	1	28.4	14.665	12.7612
6981175	Bag4	NM_026121	0.820628	0.067776	26	9	1659.23	0.325243	0.0100785	27	4	403.016	1	1	28.4	11.96	135.022
6988635	Hyou1	NM_021395	0.820628	0.067776	12	4	8162.35	0.00422279	1.99086e-06	24	15	23109	0.741167	0.00454255	26	3	25087.2
6989217	Dnaja4	NM_021422	0.820628	0.067776	12	3	127.491	1	1	28.4	15.31	89.6908	1	1	28.4	13.355	11.697
6989732	Anp32a	NM_009672	0.820628	0.067776	24	0	11627	0.211129	0.00454255	20	5	3367.53	1	0.067776	28	12	2271.09
6989901	Dennd4a	ENSMUST00000038890	0.820628	0.067776	14	5	677.267	0.13439	0.00194684	22	2	636.82	1	1	28.4	10.445	148.119
6992178	Rrp9	NM_145620	0.820628	0.067776	24	10	188.798	0.0222274	5.23961e-05	24	12	325.057	1	1	28.4	10.72	49.7641
7005072	OTTMUSG00000015204	BC038136	0.820628	0.067776	20	4	4.73762	1	1	28.4	16.79	0.347189	1	1	28.4	14.92	0.156624
7014557	Hsd17b10	NM_016763	0.820628	0.067776	24	17.5	7255.13	1	1	28.4	13.62	2758.16	1	1	28.4	13.33	3780.39
7014941	Ctps2	NM_018737	0.820628	0.067776	24	5	193.111	0.946178	0.0842688	26	5	437.911	1	0.0432758	34	15	799.455
7018328	Vsig4	NM_177789	0.820628	0.067776	20	3	1875.88	1	1	28.4	15.225	1209.91	1	1	28.4	14.75	293.312
5186178	---	---	0.916196	0.0760224	14	10	3.74767	1	1	28.4	15.995	0.543412	1	1	28.4	13.17	1.01611
5331151	---	---	0.916196	0.0760224	32	5	3.60624	1	1	28.4	13.805	2.09799	1	1	28.4	15.865	0.239002
6763972	Nuf2	NM_023284	0.916196	0.0760224	24	23	3.25269	1	1	28.4	14.4	0.897319	1	0.548847	14	8.5	0.919239
6772736	Eya4	NM_010167	0.916196	0.0760224	16	3	9.47523	1	1	28.4	16.58	0.487197	1	1	28.4	15.445	0.335522
6780570	Havcr1	NM_134248	0.916196	0.0760224	14	0	13.5765	1	1	28.4	14.485	1.54856	1	0.067776	32	25	31.042
6795936	Daam1	NM_026102	0.916196	0.0760224	24	15	828.093	1	1	28.4	11.84	96.0803	1	1	28.4	10.395	130.278
6955415	Gm839	BC147089	0.916196	0.0760224	12	7	10.4652	1	1	28.4	13.1	1.76671	1	1	28.4	16.725	1.24875
6993890	Anln	NM_028390	0.916196	0.0760224	24	0	6.43467	1	1	28.4	14.375	0.728674	1	0.345572	16	7.5	0.848528
6994714	Olfr160	NM_030553	0.916196	0.0760224	28	24.5	1.9799	1	1	28.4	11.675	0.126572	1	1	28.4	9.12	0.912875
4409268	---	---	0.947546	0.0842688	16	0	16.8999	1	1	28.4	12.775	4.50498	1	1	28.4	10.215	1.39441
4418854	---	---	0.947546	0.0842688	20	2	26.5872	1	1	28.4	12.135	13.5086	1	1	28.4	17.125	0.0657609
4461072	---	---	0.947546	0.0842688	28	10	193.252	1	1	28.4	9.685	112.578	1	0.499811	40	6	257.387
4606430	---	---	0.947546	0.0842688	24	12	185.403	1	0.499811	38	9	237.588	1	0.597883	40	15	343.159
4610534	---	---	0.947546	0.0842688	22	16	2281.2	1	1	28.4	11.32	430.545	1	1	28.4	16.125	338.076
4647586	---	---	0.947546	0.0842688	40	19.5	198.343	1	1	28.4	12.015	24.6929	1	1	28.4	10.37	44.5651
4700803	---	---	0.947546	0.0842688	26	4	2034.06	0.36786	0.0130072	20	7	989.172	1	0.345572	26	14	981.111
4717786	---	---	0.947546	0.0842688	26	4	6945.06	1	1	28.4	16.23	2108.53	1	1	28.4	10.935	718.455
4727033	---	---	0.947546	0.0842688	16	6	20.294	1	0.779701	12	6	19.6576	1	1	28.4	16.28	1.65145
4740936	---	---	0.947546	0.0842688	26	25	165.322	1	1	28.4	15.005	13.1872	1	1	28.4	13.175	26.9291
4777446	---	---	0.947546	0.0842688	24	0	1784.24	0.763806	0.054277	22	1	4768.3	1	0.846691	36	3	2494.18
4845982	---	---	0.947546	0.0842688	22	16	221.537	1	1	28.4	12.45	74.9035	1	1	28.4	13.285	37.3639
4887504	---	---	0.947546	0.0842688	21	9.5	405.172	1	1	28.4	11.225	54.6484	1	1	28.4	12.395	61.2309
5041754	---	---	0.947546	0.0842688	10	5	169.776	1	1	28.4	17.165	43.025	1	1	28.4	8.875	44.64
5084034	---	---	0.947546	0.0842688	25	5	75.3776	1	1	28.4	11.885	26.3931	1	1	28.4	12.085	59.0554
5121946	---	---	0.947546	0.0842688	34	11	346.624	1	1	28.4	13.855	111.585	1	1	28.4	12.49	36.3513
5156038	---	---	0.947546	0.0842688	14	6	1233.12	1	0.104334	22	3	318.552	1	1	28.4	10.67	146.687
5158260	---	---	0.947546	0.0842688	24	19	16089.4	0.15381	0.00259733	24	15	24020.2	1	0.285775	29.5	8.5	14663.6
5284869	---	---	0.947546	0.0842688	14	10.5	50.8763	1	1	28.4	11.56	18.4311	1	1	28.4	13.03	4.95222
5394206	---	---	0.947546	0.0842688	26	13	953.321	1	1	28.4	11.13	952.392	1	1	28.4	11.975	120.461
5467227	---	---	0.947546	0.0842688	36.6667	16.3333	5.86899	1	1	28.4	13.255	1.28658	1	1	28.4	15.6	0.911107
5473664	---	---	0.947546	0.0842688	28	7	83.2972	1	0.15798	24	17	10.4652	1	1	28.4	16.52	65.6358
5603773	---	---	0.947546	0.0842688	24	14	796.061	1	0.597883	20	10.5	914.289	1	1	28.4	12.135	166.648
6749935	Adam23	NM_011780	0.947546	0.0842688	24	19	990.727	1	1	28.4	16.745	307.891	1	1	28.4	14.94	76.4315
6750433	Smarcal1	NM_018817	0.947546	0.0842688	26	0	351.432	1	1	28.4	13.835	13.4806	1	1	28.4	9.385	70.4186
6755387	Exo1	NM_012012	0.947546	0.0842688	22	18	12.3037	1	0.924583	12	0	8.76812	1	1	28.4	12.54	1.68221
6755975	Bpnt1	NM_011794	0.947546	0.0842688	24	18.5	3342.32	1	0.597883	30	12.5	2195.64	1	1	28.4	13.705	398.373
6758958	D1Ertd53e	NM_172513	0.947546	0.0842688	26	13	2049.9	1	0.416347	20	12	3996	1	1	28.4	13.81	680.374
6758995	Als2	NM_028717	0.947546	0.0842688	24	22	1178.61	1	0.712712	26	21	96.3079	1	1	28.4	11.81	1501.73
6760339	Zfp617	NM_133358	0.947546	0.0842688	10	3	6.57609	1	1	28.4	10.1	44.4629	1	0.846691	29	6	77.3575
6765235	Dtl	NM_029766	0.947546	0.0842688	22	18	31.3955	1	1	28.4	13.175	6.37775	1	1	28.4	15.365	3.30148
6767828	Dcbld1	NM_025705	0.947546	0.0842688	32	14	6.36396	1	1	28.4	10.435	55.1352	1	1	28.4	14.145	13.9813
6768990	Ube2g2	NM_019803	0.947546	0.0842688	22	19	2045.59	0.0845496	0.00078998	24	13	2670.32	1	1	28.4	16.035	424.685
6769156	Ela2	NM_015779	0.947546	0.0842688	34	30	52.8209	1	0.846691	18	0	135.623	1	1	28.4	15.935	2.57422
6769264	Zbtb7a	NM_010731	0.947546	0.0842688	28	10.5	406.799	1	1	28.4	12.52	192.663	1	0.15798	28	27	241.194
6771264	BC048403	BC065058	0.947546	0.0842688	30	4.5	93.7624	1	1	28.4	11.82	35.2245	1	1	28.4	11.365	5.00844
6771927	Iyd	NM_027391	0.947546	0.0842688	20	0.5	2231.56	1	0.712712	40	13	5295.17	1	1	28.4	12.965	377.595
6780007	Pank3	NM_145962	0.947546	0.0842688	22	14	4936.88	1	1	28.4	11.49	633.831	1	0.15798	28	22	2528.76
6780986	Kif3a	NM_008443	0.947546	0.0842688	22	0	52.7502	0.279725	0.00776882	20	3	15.0614	1	1	28.4	10.885	3.06849
6782139	Rnf167	NM_027445	0.947546	0.0842688	22	6	5258.26	0.679025	0.0432758	24	3	1739.84	1	0.846691	32	11	2263.02
6782697	Unc119	NM_011676	0.947546	0.0842688	26	4	305.47	1	0.345572	26	5	271.953	1	1	28.4	11.94	28.0393
6784056	Rara	NM_009024	0.947546	0.0842688	26	7	416.062	1	0.499811	16	8	489.671	1	1	28.4	9.87	108.203
6784313	Nags	NM_145829	0.947546	0.0842688	24	21	3166.99	1	0.499811	27	12	2047.36	1	0.345572	30	28	4043.24
6784400	Hexim1	NM_138753	0.947546	0.0842688	26	19	2490.71	1	1	28.4	12.175	839.027	1	0.416347	30	27	2919.79
6785168	Llgl2	NM_145438	0.947546	0.0842688	22	4	557.059	1	1	28.4	9.74	189.543	1	1	28.4	10.07	212.278
6785644	4930562D19Rik	NM_177616	0.947546	0.0842688	18	13	122.895	1	1	28.4	12.59	18.3922	1	0.345572	20	6.5	73.5391
6787889	Trim41	NM_145377	0.947546	0.0842688	20	15	339.411	1	1	28.4	12.665	186.976	1	1	28.4	15.435	140.685
6788822	Slc47a1	NM_026183	0.947546	0.0842688	26	17	5592.58	1	1	28.4	13.56	1599.18	1	1	28.4	16.585	220.286
6790317	Dusp14	NM_019819	0.947546	0.0842688	22	19	184.767	1	1	28.4	12.23	44.0185	1	1	28.4	16.14	19.7021
6792544	St6galnac2	NM_009180	0.947546	0.0842688	14	2	60.2455	1	1	28.4	18.165	17.3665	1	1	28.4	11.325	18.9625
6792822	Fasn	NM_007988	0.947546	0.0842688	22	16	67692	1	1	28.4	15.015	17601.6	0.842323	0.00595676	12	2	45905.3
6792903	B3gntl1	NM_178664	0.947546	0.0842688	28	5	13.3643	1	1	28.4	10.07	10.3725	1	0.345572	12	2	14.2836
6794552	Tmem195	NM_178767	0.947546	0.0842688	26	14	10848	1	1	28.4	10.89	114.497	1	1	28.4	16.29	3486.86
6796422	Sfrs5	NM_001079695	0.947546	0.0842688	28	0.5	15051.2	1	1	28.4	17.02	13527.7	1	1	28.4	11.245	2631.75
6801506	Pygl	NM_133198	0.947546	0.0842688	26	24	13694.4	1	1	28.4	14.96	2502.1	1	1	28.4	11.865	0
6803863	Ppp1r13b	NM_011625	0.947546	0.0842688	22	9	230.305	1	1	28.4	10.07	187.893	1	1	28.4	11.675	48.4987
6807265	Txndc15	NM_175150	0.947546	0.0842688	26	23	3237.77	1	1	28.4	11.955	42.3419	1	1	28.4	11.97	1343.45
6808237	Tppp	NM_182839	0.947546	0.0842688	24	17	452.124	1	0.416347	26	15	392.02	1	1	28.4	14.425	4.44063
6811776	Aldh5a1	NM_172532	0.947546	0.0842688	14	6	3124.28	1	1	28.4	11.245	313.89	1	1	28.4	10.335	635.487
6819247	Pck2	NM_028994	0.947546	0.0842688	28	10	36.416	1	0.779701	26	9.5	54.9068	1	1	28.4	14.53	6.8402
6822127	Dnajc3	NM_008929	0.947546	0.0842688	12	3	8214.81	0.211129	0.00454255	28	15	14792.3	1	0.054277	26	5	13139.2
6823690	Itih3	NM_008407	0.947546	0.0842688	22	1	17502.8	1	0.193236	40	37	43993.8	1	1	28.4	11.22	8070.43
[truncated: 2,078 more rows]
